# Supplementary material for: Integrative analyses of maternal plasma cell-free DNA nucleosome footprint differences reveal chromosomal aneuploidy fetuses gene expression profile
Source: J Transl Med. 2022 Nov 18;20:536. doi: 10.1186/s12967-022-03735-7 (PMC9673457; doi:10.1186/s12967-022-03735-7)
Supplement: Supplementary file 2 — Additional file 2: Table S2. Differential promoter coverage genes and GO, KEGG enrichment analysis results of differential genes for pregnant women with trisomy 21. [file 12967_2022_3735_MOESM2_ESM.xlsx]

## Sheet: T21
REFSEQ	symbol	diff.log2	pval	padj
NM_001350218	SGIP1	0.102937	0.874398	1
NM_001308203	SGIP1	0.194751	0.19616	1
NM_001350398	AZIN2	-0.0445052	0.56844	1
NM_001323575	AGBL4	-0.0512205	0.474989	1
NM_001145278	NECAP2	0.14255	0.372821	1
NM_001350402	AZIN2	0.0216342	0.821864	1
NM_001350399	AZIN2	-0.042067	0.608108	1
NM_013943	CLIC4	-0.219558	0.48481	1
NM_001080397	SLC45A1	0.210753	0.719347	1
NM_003243	TGFBR3	-0.0895733	0.628389	1
NM_001195684	TGFBR3	0.174507	0.106841	1
NM_001918	DBT	-0.0463047	0.555495	1
NM_001303229	PRUNE1	-0.0870964	0.927485	1
NM_022457	COP1	0.188225	0.406689	1
NM_030806	C1orf21	-0.143564	0.601413	1
NM_173083	LIN9	0.103863	0.455255	1
NM_001270410	LIN9	0.0824504	0.675139	1
NM_001330306	C1orf159	-0.00212419	0.647172	1
NM_001350806	PRKCZ	-0.137531	0.235519	1
NM_012405	ICMT	-0.215363	0.621597	1
NM_001242874	PRKCZ	-0.0707461	0.492987	1
NM_001349610	CAMTA1	-0.443472	0.141246	1
NM_002744	PRKCZ	-0.0158162	0.705055	1
NM_022114	PRDM16	-0.505189	0.432316	0.46566
NM_001033582	PRKCZ	-0.0179748	0.697947	1
NM_001099850	PRAMEF18	0.0126411	0.784804	1
NM_001291381	PRAMEF33	-0.0399869	0.965614	1
NM_001039361	PRAMEF10	-0.0330192	0.859322	1
NM_001350166	USP48	-0.175219	0.505183	1
NM_032409	PINK1	-0.361907	0.0258022	1
NM_001309193	EPHB2	0.403052	0.195002	1
NM_006559	KHDRBS1	-0.111047	0.530039	1
NM_001166007	EPB41	-0.073234	0.388515	1
NM_001145454	STMN1	-0.229813	0.164725	1
NM_014676	PUM1	-0.155629	0.330008	1
NM_006600	NUDC	-0.303819	0.334812	1
NM_001282562	EYA3	-0.245495	0.216993	1
NM_001166006	EPB41	-0.107615	0.965614	1
NM_005119	THRAP3	-0.0566734	0.423198	1
NM_001281956	CSMD2	-0.229814	0.0753836	1
NM_001321473	THRAP3	-0.0841838	0.412149	1
NM_005066	SFPQ	-0.612391	0.0570576	0.108498
NM_012090	MACF1	0.0307633	0.302116	1
NM_052896	CSMD2	-0.268216	0.167688	1
NM_001355224	CCDC30	0.181167	0.206388	1
NM_001355226	CCDC30	0.0336317	0.56844	1
NM_001355227	CCDC30	0.0338793	0.950348	1
NM_021639	GPBP1L1	-0.177457	0.770109	1
NM_130440	PTPRF	0.424413	0.22798	1
NM_001319956	RNF220	-0.0225385	0.912274	1
NM_001194986	TRABD2B	0.0136143	0.345072	1
NM_001319957	RNF220	-0.172342	0.0634205	1
NM_001329138	PTPRF	0.0575868	0.536348	1
NM_007051	FAF1	0.481653	0.117437	1
NM_015306	USP24	-0.120617	0.209881	1
NM_153035	TCEANC2	-0.11233	0.536348	1
NM_001193617	SCP2	-0.239916	0.0373829	1
NM_001353983	DAB1	0.0471493	0.755495	1
NM_002867	RAB3B	-0.0243014	0.440088	1
NM_021080	DAB1	-0.0861592	0.957979	1
NM_001353985	DAB1	-0.0110695	0.705055	1
NM_001353986	DAB1	-0.0971566	0.147757	1
NM_001350798	FGGY	-0.309362	0.0102878	1
NM_020925	CACHD1	-0.170156	0.345072	1
NM_001293274	CACHD1	0.243921	0.122459	1
NM_001206739	ITGB3BP	-0.137258	0.189549	1
NM_018291	FGGY	-0.28424	0.0129024	1
NM_002303	LEPR	0.331142	0.163861	1
NM_001145512	NFIA	-0.0835038	0.642066	1
NM_001145511	NFIA	0.310955	0.0022291	1
NM_005595	NFIA	-0.217149	0.934731	1
NM_003368	USP1	-0.332737	0.0533875	1
NM_001198689	LEPR	-0.237667	0.247151	1
NM_001017416	USP1	0.0113733	0.628389	1
NM_020794	LRRC7	0.099737	0.302116	1
NM_001330635	LRRC7	-0.0804465	0.330008	1
NM_173808	NEGR1	-0.361631	0.829327	1
NM_001350216	LRRC7	-0.117729	0.26741	1
NM_001349107	ST6GALNAC3	0.274533	0.106841	1
NM_005482	PIGK	0.0573857	0.705055	1
NM_032270	LRRC8C	0.0633659	0.984626	1
NM_012128	CLCA4	0.395488	0.0271426	1
NM_001134445	DDAH1	0.0989	0.492987	1
NM_002061	GCLM	-0.0593896	0.858534	1
NM_001252269	DIPK1A	-0.179097	0.486948	1
NM_001252271	DIPK1A	-0.0429343	0.690865	1
NM_001312688	NTNG1	-0.0160889	0.851802	1
NM_001113226	NTNG1	0.153524	0.111135	1
NM_001330665	NTNG1	0.300727	0.173734	1
NM_001323041	PHTF1	0.11594	0.354471	1
NM_001204269	KCNA2	-0.0591807	0.683809	1
NM_001042679	RHOC	0.0650734	0.844296	1
NM_001042678	RHOC	0.125942	0.614837	1
NM_006496	GNAI3	0.0991579	0.24323	1
NM_001323042	PHTF1	0.010264	0.633418	1
NM_006608	PHTF1	-0.0526706	0.733737	1
NM_002884	RAP1A	-0.356657	0.15049	1
NM_001291896	RAP1A	-0.39895	0.108972	1
NM_024408	NOTCH2	-0.201055	0.1618	1
NM_006784	WDR3	-0.0279307	0.835897	1
NM_001037501	NBPF8	-0.175321	0.0373829	1
NM_001037675	NBPF9	-0.102485	0.385279	1
NM_001201326	PDZK1	-0.0663527	0.406689	1
NM_020205	OTUD7B	-0.0911339	0.703524	1
NM_001278267	NBPF20	-0.0762449	0.320533	1
NM_001302371	NBPF10	-0.106463	0.0707001	1
NM_001351365	NBPF19	0.117096	0.235519	1
NM_001349679	TPM3	0.121504	0.0648253	1
NM_001323615	SMG5	-0.170762	0.145063	1
NM_001323617	SMG5	-0.229216	0.369678	1
NM_001278191	TPM3	-0.0507883	0.784804	1
NM_015327	SMG5	-0.19189	0.0891043	1
NM_152263	TPM3	-0.104099	0.259175	1
NM_021642	FCGR2A	0.0108822	0.927485	1
NM_002585	PBX1	-0.282447	0.269956	1
NM_001353130	PBX1	0.115167	0.814418	1
NM_001350204	DNM3	0.0416963	0.451557	1
NM_022093	TNN	0.165146	0.247151	1
NM_001163629	MROH9	-0.072637	0.34949	1
NM_025063	MROH9	-0.0804336	0.320533	1
NM_005092	TNFSF18	-0.187974	0.192834	1
NM_003101	SOAT1	0.0674587	0.762792	1
NM_001174061	SMG7	-0.186695	0.137202	1
NM_170692	RASAL2	0.0163394	0.783634	1
NM_001137669	RGSL1	-0.062347	0.648951	1
NM_021165	BRINP2	-0.043933	0.56195	1
NM_032360	ACBD6	-0.0238408	0.874398	1
NM_000963	PTGS2	0.0373974	0.821864	1
NM_133494	NEK7	-0.168805	0.26741	1
NM_194314	ZBTB41	-0.123969	0.417652	1
NM_001331029	PPP1R12B	0.33006	0.0307558	1
NM_015326	SRGAP2	-0.184985	0.0238978	1
NM_001122834	HHAT	0.234974	0.149761	1
NM_001243511	ESRRG	0.10265	0.56844	1
NM_018664	BATF3	0.651428	0.045172	0.0923171
NM_001170588	HHAT	0.125373	0.542693	1
NM_206595	ESRRG	-0.0301287	0.690865	1
NM_001170580	HHAT	0.128693	0.633424	1
NM_001243513	ESRRG	-0.0554493	0.492987	1
NM_001243505	ESRRG	-0.048151	0.806988	1
NM_001243509	ESRRG	-0.0440862	0.457353	1
NM_001350125	ESRRG	0.160458	0.1618	1
NM_001350122	ESRRG	-0.053079	0.836804	1
NM_206933	USH2A	0.29019	0.0144152	1
NM_001373	DNAH14	0.590948	0.0160802	0.0566304
NM_004446	EPRS1	0.0876445	0.555495	1
NM_018230	NUP133	0.115308	0.581526	1
NM_145214	TRIM11	-0.31539	0.198366	1
NM_001301365	LYST	-0.573277	0.330008	0.384061
NM_001350113	RGS7	-0.167201	0.354471	1
NM_001291939	MTR	0.257486	0.092828	1
NM_001350116	RGS7	0.00157305	0.851802	1
NM_000081	LYST	-0.0656832	0.854753	1
NM_001167740	SMYD3	-0.250986	0.0855005	1
NM_018012	KIF26B	-0.168685	0.278412	1
NM_032752	ZNF496	-0.148291	0.334812	1
NM_022743	SMYD3	-0.131276	0.235519	1
NM_001001918	OR14C36	-0.0589158	0.642066	1
NM_001198993	NADK	0.0286227	0.799575	1
NM_001198994	NADK	0.003915	0.463191	1
NM_033489	CDK11B	-0.206945	0.234087	1
NM_017900	AURKAIP1	-0.119509	0.746877	1
NM_001353641	NADK	-0.0839982	0.814418	1
NM_023018	NADK	0.0695643	0.888894	1
NM_001353642	NADK	0.0744609	0.919419	1
NM_001014980	C1QTNF12	0.17071	0.509265	1
NM_003820	TNFRSF14	0.154623	0.295859	1
NM_001242672	TTC34	-0.222382	0.374835	1
NM_003036	SKI	0.0157266	0.688784	1
NM_001409	MEGF6	0.332825	0.0270259	1
NM_004402	DFFB	-0.0279625	0.647208	1
NM_152492	CCDC27	0.0917938	0.216993	1
NM_001042478	AJAP1	0.134189	0.911748	1
NM_172130	KCNAB2	0.205946	0.12967	1
NM_015102	NPHP4	0.327705	0.682134	1
NM_001199862	KCNAB2	-0.0746878	0.9351	1
NM_001199861	KCNAB2	0.252805	0.843421	1
NM_001199860	KCNAB2	-0.0393369	0.374835	1
NM_001199863	KCNAB2	-0.0987531	0.72653	1
NM_007274	ACOT7	0.0655335	0.572967	1
NM_181864	ACOT7	-0.057305	0.919876	1
NM_001265592	PLEKHG5	-0.186224	0.505183	1
NM_001042663	PLEKHG5	-0.20429	0.662808	1
NM_198681	PLEKHG5	0.0447104	0.821864	1
NM_001349621	CAMTA1	-0.0831119	0.996178	1
NM_016831	PER3	-0.185517	0.0926991	1
NM_001349617	CAMTA1	-0.0784119	0.912274	1
NM_001349625	CAMTA1	-0.0889997	0.980893	1
NM_001561	TNFRSF9	-0.102352	0.755495	1
NM_001042681	RERE	-0.0413595	0.385279	1
NM_024980	GPR157	-0.143089	0.574966	1
NM_004285	H6PD	-0.0541243	0.761516	1
NM_001282587	H6PD	0.0875403	0.390567	1
NM_015074	KIF1B	-0.536593	0.0753836	0.124751
NM_006048	UBE4B	-0.2994	0.0965187	1
NM_020248	CTNNBIP1	-0.419263	0.0722343	1
NM_014944	CLSTN1	-0.535926	0.202937	0.254457
NM_001170754	C1orf127	-0.212361	0.048422	1
NM_017766	CASZ1	-0.290615	0.0820142	1
NM_002685	EXOSC10	0.499153	0.0250879	0.0676007
NM_004958	MTOR	-0.000913652	0.457353	1
NM_004565	PEX14	-0.106951	0.385279	1
NM_001243	TNFRSF8	-0.138533	0.881953	1
NM_015378	VPS13D	-0.565052	0.662808	0.671094
NM_014874	MFN2	0.107259	0.490902	1
NM_020350	AGTRAP	-0.0574639	0.505183	1
NM_001306072	PRAMEF26	-0.0124569	0.719347	1
NM_001100631	PRAMEF22	-0.0450919	0.851802	1
NM_001013630	AADACL4	-0.0174634	0.777447	1
NM_052929	FHAD1	-0.0474057	0.777447	1
NM_015209	KAZN	0.127032	0.682194	1
NM_001018001	KAZN	0.0668007	0.306653	1
NM_001018000	KAZN	-0.226194	0.15326	1
NM_001017999	KAZN	0.0376097	0.996178	1
NM_015001	SPEN	-0.397566	0.378003	1
NM_015291	DNAJC16	-0.176864	0.46907	1
NM_018994	FBXO42	-0.0666291	0.26327	1
NM_017940	NBPF1	0.0889403	0.434416	1
NM_001135248	MFAP2	-0.170253	0.26327	1
NM_001135247	MFAP2	-0.0933951	0.588121	1
NM_007365	PADI2	-0.131414	0.46907	1
NM_013358	PADI1	0.00254769	0.792181	1
NM_001319837	ARHGEF10L	0.0844508	0.601413	1
NM_032880	IGSF21	-0.119738	0.275821	1
NM_001319838	ARHGEF10L	0.121877	0.354471	1
NM_030812	ACTL8	-0.174216	0.621597	1
NM_018125	ARHGEF10L	-0.25711	0.0264652	1
NM_001206541	CAPZB	-0.175612	0.352497	1
NM_001282162	CAPZB	-0.0595449	0.536348	1
NM_002584	PAX7	-0.0399486	0.311235	1
NM_020765	UBR4	0.375281	0.182052	1
NM_001136265	IFFO2	-0.309375	0.10553	1
NM_001349113	TMCO4	0.0314758	0.740967	1
NM_001198803	EIF4G3	0.112895	0.364565	1
NM_001198802	EIF4G3	-0.102397	0.451557	1
NM_001127501	ALPL	-0.0437376	0.690865	1
NM_003760	EIF4G3	0.0580638	0.523768	1
NM_016287	HP1BP3	0.0639902	0.401272	1
NM_001113348	ECE1	-0.391841	0.0908551	1
NM_044472	CDC42	0.379138	0.858519	1
NM_001330398	ZBTB40	-0.098575	0.536348	1
NM_005529	HSPG2	0.119837	0.490902	1
NM_001013693	LDLRAD2	-0.0631388	0.364565	1
NM_033631	LUZP1	0.0353729	0.897095	1
NM_004091	E2F2	-0.141109	0.676781	1
NM_003196	TCEA3	0.0870865	0.806988	1
NM_001330409	NIPAL3	0.0140852	0.874398	1
NM_001322857	NIPAL3	-0.106518	0.213416	1
NM_170743	IFNLR1	0.0171082	0.942395	1
NM_001322854	NIPAL3	0.0264316	0.859322	1
NM_020448	NIPAL3	0.00859641	0.889519	1
NM_001010980	NCMAP	0.0242164	0.9351	1
NM_001282564	MACO1	-0.165253	0.278412	1
NM_001289010	MAN1C1	-0.20466	0.172703	1
NM_020485	RHCE	-0.00650781	0.770109	1
NM_001330441	RPS6KA1	-0.0620889	0.733737	1
NM_031286	SH3BGRL3	0.375261	0.0111259	1
NM_024674	LIN28A	-0.172385	0.0986438	1
NM_002953	RPS6KA1	0.0782049	0.654146	1
NM_001201404	WASF2	-0.386617	0.0204481	1
NM_032125	TMEM222	-0.00816213	0.973252	1
NM_001029882	AHDC1	-0.0375235	0.832128	1
NM_001048183	PHACTR4	0.108144	0.370243	1
NM_001135218	TAF12	0.16754	0.173734	1
NM_001048199	RCC1	-0.0389296	0.82088	1
NM_133177	PTPRU	0.0750077	0.697947	1
NM_005626	SRSF4	0.192149	0.166798	1
NM_002379	MATN1	-0.0689463	0.821864	1
NM_001195101	PTP4A2	0.345579	0.00999616	1
NM_080391	PTP4A2	0.383585	0.65411	1
NM_001300826	RNF19B	-0.0312433	0.843426	1
NM_001256121	S100PBP	0.103416	0.51134	1
NM_001291496	ZBTB8A	0.190349	0.170691	1
NM_012316	KPNA6	-0.0781828	0.59475	1
NM_001161708	SYNC	-0.203928	0.249594	1
NM_022753	S100PBP	0.0323288	0.927485	1
NM_004964	HDAC1	0.149668	0.601413	1
NM_145238	ZSCAN20	-0.277546	0.0152279	1
NM_198040	PHC2	-0.0908153	0.380035	1
NM_001080418	DLGAP3	-0.204136	0.224275	1
NM_005202	COL8A2	-0.0144569	0.919876	1
NM_017629	AGO4	-0.101585	0.82088	1
NM_001350139	ZMYM4	-0.252499	0.26327	1
NM_024874	KIAA0319L	0.0924035	0.732329	1
NM_024852	AGO3	-0.13297	0.56844	1
NM_178548	TFAP2E	0.189668	0.492987	1
NM_032017	STK40	-0.170008	0.385279	1
NM_000831	GRIK3	-0.313559	0.186305	1
NM_005540	INPP5B	0.0442166	0.642066	1
NM_001350228	INPP5B	-0.0630444	0.74822	1
NM_024700	SNIP1	0.200353	0.15326	1
NM_024640	YRDC	-0.244142	0.0966741	1
NM_001271851	RRAGC	0.229402	0.160964	1
NM_012421	RLF	0.0599295	0.278412	1
NM_001720	BMP8B	0.141521	0.399204	1
NM_181809	BMP8A	-0.157843	0.237905	1
NM_012236	SCMH1	-0.367536	0.0648253	1
NM_001172222	SCMH1	-0.163359	0.0947356	1
NM_001172221	SCMH1	0.101587	0.102678	1
NM_172163	KCNQ4	-0.272193	0.224275	1
NM_173642	RIMKLA	0.150138	0.344553	1
NM_001127714	HIVEP3	0.258855	0.220613	1
NM_001198851	FOXJ3	-0.0613458	0.509273	1
NM_001198850	FOXJ3	-0.0615645	0.678663	1
NM_014947	FOXJ3	-0.0223381	0.521717	1
NM_001198852	FOXJ3	-0.000154271	0.612985	1
NM_001253357	TIE1	-0.0861214	0.311235	1
NM_001195831	CFAP57	-0.0181416	0.799575	1
NM_015284	SZT2	0.30898	0.164725	1
NM_001354602	TMEM269	-0.137166	0.51134	1
NM_001301700	ERI3	-0.0981658	0.401272	1
NM_001270463	ST3GAL3	-0.0576586	0.237905	1
NM_001270459	ST3GAL3	-0.054088	0.215698	1
NM_014652	IPO13	-0.273833	0.0769993	1
NM_001297655	KIF2C	-0.176786	0.434416	1
NM_001166588	EIF2B3	-0.254163	0.0986438	1
NM_001320800	TESK2	-0.216068	0.209881	1
NM_020883	ZSWIM5	-0.334333	0.0986438	1
NM_001297657	KIF2C	-0.0115519	0.74822	1
NM_001303427	P3R3URF-PIK3R3	-0.143781	0.0737954	1
NM_198973	MKNK1	-0.0697288	1	1
NM_001324320	MAST2	-0.150173	0.581526	1
NM_001324321	MAST2	-0.0618255	0.581526	1
NM_001328653	PIK3R3	0.158521	0.139785	1
NM_001328651	PIK3R3	-0.00479382	0.881288	1
NM_001328650	PIK3R3	0.102267	0.608108	1
NM_017739	POMGNT1	0.0656345	0.614837	1
NM_001114172	PIK3R3	0.0185685	0.829327	1
NM_015112	MAST2	-0.148858	0.628389	1
NM_001243766	POMGNT1	0.140576	0.231728	1
NM_001303428	PIK3R3	0.13823	0.275821	1
NM_001328648	PIK3R3	-0.0540951	0.733737	1
NM_001290129	POMGNT1	0.00309815	0.919876	1
NM_001136140	CMPK1	-0.0251941	0.628389	1
NM_001320289	CYP4X1	-0.110393	0.712189	1
NM_178134	CYP4Z1	0.024068	0.669781	1
NM_001286239	SPATA6	0.0176359	0.449459	1
NM_001294348	ELAVL4	0.0587296	0.26741	1
NM_001144775	ELAVL4	0.206991	0.359496	1
NM_001144774	ELAVL4	-0.0187867	0.315862	1
NM_001144777	ELAVL4	0.167743	0.145063	1
NM_001144776	ELAVL4	0.0973543	0.334812	1
NM_001350208	OSBPL9	0.130996	0.302116	1
NM_002525	NRDC	0.159498	0.145063	1
NM_001297665	TTC39A	0.105622	0.306653	1
NM_001297664	TTC39A	-0.0918377	0.996178	1
NM_001297663	TTC39A	-0.0163725	0.792181	1
NM_001144832	TTC39A	-0.0624856	0.784804	1
NM_001242361	NRDC	0.268374	0.0238978	1
NM_001981	EPS15	-0.141004	0.566469	1
NM_001307931	ZYG11A	-0.0671378	0.259175	1
NM_001330585	CC2D1B	-0.559496	0.280093	0.332662
NM_004799	ZFYVE9	-0.253337	0.0955566	1
NM_015269	TUT4	-0.207571	0.116312	1
NM_024646	ZYG11B	0.0471233	0.965614	1
NM_004631	LRP8	0.15798	0.186305	1
NM_147193	GLIS1	0.0479465	0.486948	1
NM_016126	HSPB11	0.122634	0.843412	1
NM_018087	NDC1	0.106194	0.581526	1
NM_001316935	HSPB11	0.0614132	0.750411	1
NM_147161	ACOT11	-0.180921	0.058048	1
NM_018070	SSBP3	-0.331492	0.23904	1
NM_001353356	CYB5RL	-0.244971	0.866854	1
NM_003713	PLPP3	-0.00287999	0.821864	1
NM_001278544	C8B	0.0190508	0.697947	1
NM_006252	PRKAA2	-0.236883	0.176816	1
NM_001004303	FYB2	0.122805	0.164725	1
NM_145243	OMA1	-0.0590887	0.515475	1
NM_001350799	FGGY	-0.00599289	0.927485	1
NM_015888	HOOK1	-0.0105229	0.897095	1
NM_001278224	FGGY	-0.200315	0.15049	1
NM_176877	PATJ	0.162988	0.344553	1
NM_181712	KANK4	-0.0759597	0.492987	1
NM_001320269	KANK4	-0.0789497	0.451557	1
NM_032852	ATG4C	0.254187	0.0278348	1
NM_033407	DOCK7	0.156172	0.480948	1
NM_001083592	ROR1	0.133373	0.719347	1
NM_001172818	PGM1	-0.0261917	0.919876	1
NM_001172819	PGM1	0.0128754	0.90468	1
NM_002633	PGM1	0.0931363	0.451557	1
NM_001321857	JAK1	0.0169407	0.683809	1
NM_014787	DNAJC6	0.0937781	0.463191	1
NM_203464	AK4	0.035705	0.655865	1
NM_001330616	AK4	-0.0318505	1	1
NM_001321854	JAK1	0.0833991	0.689272	1
NM_018211	RAVER2	0.300991	0.369678	1
NM_001256864	DNAJC6	-0.125723	0.806988	1
NM_001321856	JAK1	0.11694	0.306653	1
NM_013410	AK4	-0.195816	0.523768	1
NM_001005353	AK4	-0.172296	0.621597	1
NM_002600	PDE4B	-0.0791031	0.574966	1
NM_001297441	PDE4B	0.21817	0.0567649	1
NM_001297440	PDE4B	-0.111333	0.145063	1
NM_001037340	PDE4B	-0.115723	0.712189	1
NM_015139	SLC35D1	-0.072121	0.642066	1
NM_144701	IL23R	0.12552	0.505183	1
NM_207014	DNAI4	-0.0197342	0.866854	1
NM_152665	DYNLT5	-0.0345124	0.836804	1
NM_001018067	SERBP1	0.105964	0.90414	1
NM_017779	DEPDC1	-0.0179123	0.740967	1
NM_024911	WLS	0.0822703	0.457353	1
NM_018841	GNG12	0.0303055	0.792181	1
NM_001193334	WLS	0.0502937	0.581526	1
NM_017768	LRRC40	0.0164024	0.690865	1
NM_030816	ANKRD13C	0.184946	0.239353	1
NM_001126044	PTGER3	-0.157811	0.137202	1
NM_001199327	FPGT-TNNI3K	-0.00595466	0.859322	1
NM_001105659	LRRIQ3	-0.0449549	0.836804	1
NM_015978	TNNI3K	-0.157566	0.372821	1
NM_001002912	ERICH3	0.153856	0.113332	1
NM_001130058	SLC44A5	-0.0200462	0.836804	1
NM_002440	MSH4	0.00956174	0.942722	1
NM_001320287	SLC44A5	-0.00771002	0.9351	1
NM_001320283	SLC44A5	0.0478016	0.777447	1
NM_030965	ST6GALNAC5	0.103316	0.480948	1
NM_001270384	MIGA1	0.0876953	0.423198	1
NM_001304725	GIPC2	-0.207784	0.192834	1
NM_017655	GIPC2	-0.131135	0.655865	1
NM_144573	NEXN	0.11542	0.635212	1
NM_001308237	ZZZ3	0.0978504	0.683809	1
NM_015534	ZZZ3	0.0576526	0.474989	1
NM_174858	AK5	-0.188506	0.255123	1
NM_012093	AK5	-0.0668945	0.851802	1
NM_022159	ADGRL4	0.159038	0.957979	1
NM_001350699	ADGRL2	-0.308156	0.0555052	1
NM_001350698	ADGRL2	-0.0594663	0.359496	1
NM_012302	ADGRL2	-0.321493	0.0392157	1
NM_001297704	ADGRL2	0.0296763	0.676781	1
NM_001134664	SAMD13	-0.243117	0.0606856	1
NM_001134663	SAMD13	-0.0865986	0.957979	1
NM_001350215	TTLL7	0.0459829	0.919876	1
NM_001242859	PRKACB	0.0864045	0.428786	1
NM_001242862	PRKACB	0.0282976	0.912274	1
NM_001242861	PRKACB	-0.0461722	0.628389	1
NM_002731	PRKACB	-0.167943	0.574966	1
NM_182948	PRKACB	-0.235086	0.1618	1
NM_001010971	SAMD13	-0.0957063	0.474989	1
NM_153259	MCOLN2	-0.126289	0.164725	1
NM_001330655	DDAH1	0.0239926	0.770109	1
NM_198077	C1orf52	-0.238764	0.15049	1
NM_001288563	DNAI3	0.229458	0.486948	1
NM_012152	LPAR3	-0.223793	0.104743	1
NM_012137	DDAH1	-0.0663008	0.451557	1
NM_006536	CLCA2	-0.0917995	0.369678	1
NM_152890	COL24A1	-0.257766	0.179939	1
NM_001290053	LINC02801	-0.0880282	0.697947	1
NM_001134492	HS2ST1	-0.0498974	0.606237	1
NM_015350	LRRC8B	0.113807	0.26327	1
NM_001320709	PKN2	0.00636309	0.980783	1
NM_002053	GBP1	0.0150074	0.555495	1
NM_001134476	LRRC8B	-0.00851096	0.224275	1
NM_052941	GBP4	-0.097449	0.216993	1
NM_018103	LRRC8D	-0.341282	0.0499206	1
NM_001134479	LRRC8D	-0.157806	0.592843	1
NM_001017975	HFM1	-0.234746	0.0495475	1
NM_024813	RPAP2	0.134492	0.619766	1
NM_001350198	EVI5	-0.112842	0.889519	1
NM_001308248	EVI5	0.129586	0.417652	1
NM_007358	MTF2	-0.139288	0.284409	1
NM_001024948	FNBP1L	0.136255	0.90468	1
NM_001261408	BCAR3	-0.331853	0.19616	1
NM_001261409	BCAR3	-0.0219629	0.621597	1
NM_206886	CCDC18	0.178897	0.357518	1
NM_003567	BCAR3	0.0721445	0.874398	1
NM_152369	SLC44A3	0.142566	0.26327	1
NM_002858	ABCD3	-0.221161	0.0373829	1
NM_001114106	SLC44A3	0.133285	0.492987	1
NM_000350	ABCA4	-0.071045	0.440088	1
NM_001199691	TLCD4-RWDD3	-0.148959	0.443705	1
NM_001300989	PTBP2	0.249621	0.261679	1
NM_001160301	DPYD	0.345103	0.0786427	1
NM_152238	SNX7	0.0327751	0.705055	1
NM_014839	PLPPR4	-0.0687223	0.859322	1
NM_033055	MFSD14A	-0.210498	0.434416	1
NM_017734	PALMD	-0.0921907	0.417652	1
NM_001199834	VCAM1	-0.0739134	0.690865	1
NM_033313	CDC14A	0.147087	0.499065	1
NM_001319211	CDC14A	-0.0417184	0.799575	1
NM_001288823	OLFM3	-0.070316	0.957979	1
NM_080629	COL11A1	0.0908917	0.621597	1
NM_001346780	AMY1C	-0.0842367	0.874398	1
NM_017619	RNPC3	-0.0550484	0.72653	1
NM_004038	AMY1A	-0.0344964	0.74822	1
NM_001008219	AMY1C	-0.00949634	0.988535	1
NM_001008218	AMY1B	-0.0230012	0.859322	1
NM_001008221	AMY1A	-0.0606889	0.859322	1
NM_006113	VAV3	-0.109657	0.988469	1
NM_001079874	VAV3	0.11692	0.288769	1
NM_001142551	WDR47	0.256326	0.0593547	1
NM_020775	ELAPOR1	-0.0871281	0.417652	1
NM_007269	STXBP3	-0.00584255	0.897095	1
NM_001265613	MYBPHL	0.153927	0.0966741	1
NM_001321039	GPSM2	-0.25372	0.278412	1
NM_004978	KCNC4	-0.223964	0.206388	1
NM_001201545	RBM15	-0.175667	0.655865	1
NM_146421	GSTM1	0.0942152	0.896441	1
NM_001349887	DRAM2	0.348033	0.0946022	1
NM_001081976	TMIGD3	0.191113	0.0677109	1
NM_138728	ST7L	-0.0233873	0.606237	1
NM_018704	CTTNBP2NL	-0.159586	0.176816	1
NM_001308264	ST7L	0.0561142	0.805928	1
NM_004980	KCND3	-0.174334	0.719347	1
NM_014813	LRIG2	-0.0152432	0.973252	1
NM_001142782	MAGI3	-0.0724651	0.683809	1
NM_205848	SYT6	-0.0768967	0.705055	1
NM_015906	TRIM33	-0.0762774	0.980893	1
NM_198459	DENND2C	-0.206204	0.206388	1
NM_001270805	SYT6	0.0606902	0.988535	1
NM_001010922	BCL2L15	0.089463	0.608108	1
NM_001232	CASQ2	0.0258784	0.784804	1
NM_003176	SYCP1	0.0434302	0.395898	1
NM_002506	NGF	-0.177011	0.179939	1
NM_001308316	TSPAN2	-0.0319199	0.46907	1
NM_018420	SLC22A15	-0.422883	0.00943471	1
NM_001328609	CD2	0.0676585	0.517535	1
NM_001542	IGSF3	-0.176265	0.156068	1
NM_000701	ATP1A1	0.0615808	0.768868	1
NM_001007237	IGSF3	-0.108817	0.56195	1
NM_001253849	VTCN1	-0.0881666	0.280093	1
NM_001256111	CD101	-0.0560034	0.385279	1
NM_024626	VTCN1	-0.000614183	0.712189	1
NM_006699	MAN1A2	0.504011	0.0102878	0.0478913
NM_206996	SPAG17	-0.0929388	0.369678	1
NM_016527	HAO2	-0.102502	0.440088	1
NM_015836	WARS2	0.150948	0.1618	1
NM_001320149	FAM72B	-0.227226	0.192834	1
NM_001271872	SRGAP2C	0.0458326	0.705055	1
NM_001100910	FAM72B	-0.282471	0.288769	1
NM_203458	NOTCH2NLA	0.125617	0.740967	1
NM_001198834	PDE4DIP	0.0791242	0.1618	1
NM_001350522	PDE4DIP	0.00375004	0.517535	1
NM_004892	SEC22B	0.15142	0.517535	1
NM_001350521	PDE4DIP	-0.0321	0.173734	1
NM_014455	RNF115	0.0124219	0.896513	1
NM_153713	LIX1L	0.0258024	0.755495	1
NM_001195261	PDE4DIP	0.0660763	0.199528	1
NM_001195260	PDE4DIP	0.0233254	0.505183	1
NM_001278141	NBPF12	-0.0858389	0.492987	1
NM_001348451	CHD1L	0.171183	0.455255	1
NM_001461	FMO5	-0.124437	0.601413	1
NM_001350181	GPR89B	-0.0562012	0.515475	1
NM_004326	BCL9	0.102616	0.415574	1
NM_001101663	NBPF11	-0.119011	0.536348	1
NM_183372	NBPF11	0.0932887	0.608108	1
NM_001013644	LINC02591	0.056478	0.434416	1
NM_001135789	PPIAL4C	-0.108875	0.74822	1
NM_001348147	LOC644634	0.0430795	0.492987	1
NM_004436	ENSA	0.0800311	0.669781	1
NM_001279354	VPS45	0.132441	0.555495	1
NM_007259	VPS45	0.213469	0.26741	1
NM_001199739	CTSS	-0.148424	0.806988	1
NM_015203	RPRD2	-0.119553	0.866107	1
NM_025150	TARS2	0.00191915	0.912274	1
NM_001301317	TUFT1	0.107688	0.334812	1
NM_207171	POGZ	0.255208	0.0258022	1
NM_030918	SNX27	0.0988024	0.866104	1
NM_015100	POGZ	0.0248594	0.980893	1
NM_020832	ZNF687	-0.525848	0.113332	0.166303
NM_020127	TUFT1	0.0908821	0.390567	1
NM_005060	RORC	0.0168978	0.784804	1
NM_001304764	ZNF687	-0.14055	0.426689	1
NM_001001523	RORC	-0.115557	0.792181	1
NM_001206612	CHTOP	-0.294228	0.134655	1
NM_024330	SLC27A3	0.103426	0.927485	1
NM_001159484	NUP210L	-0.188438	0.288769	1
NM_020699	GATAD2B	-0.18933	0.337738	1
NM_020524	PBXIP1	-0.234682	0.239353	1
NM_002249	KCNN3	-0.0683852	0.965614	1
NM_170782	KCNN3	0.173025	0.0691924	1
NM_001206866	IL6R	0.212103	0.297622	1
NM_004952	EFNA3	0.0388073	0.859322	1
NM_001350779	MSTO1	-0.029082	0.51134	1
NM_152280	SYT11	0.171593	0.202937	1
NM_170708	LMNA	-0.337439	0.0287384	1
NM_001282625	LMNA	-0.0417115	0.74822	1
NM_001282624	LMNA	0.075189	0.259175	1
NM_018489	ASH1L	0.222657	0.247151	1
NM_144702	LRRC71	-0.0724139	0.534315	1
NM_005973	PRCC	-0.18639	0.455255	1
NM_178229	IQGAP3	-0.0880065	0.705055	1
NM_001347698	CD5L	0.103095	0.306653	1
NM_031282	FCRL4	-0.0825832	0.897095	1
NM_003126	SPTA1	0.00726363	0.662808	1
NM_001206567	IFI16	0.0882645	0.499065	1
NM_001231	CASQ1	0.172342	0.048422	1
NM_001135050	IGSF9	-0.131696	0.799575	1
NM_002241	KCNJ10	-0.0828269	0.374835	1
NM_004371	COPA	0.00742959	0.755495	1
NM_001284217	FCRL6	0.0395876	0.648951	1
NM_001004310	FCRL6	-0.0925304	0.374835	1
NM_012394	PFDN2	0.178264	0.158915	1
NM_016382	CD244	0.135717	0.220613	1
NM_001164757	NOS1AP	-0.137734	0.302116	1
NM_007348	ATF6	0.309574	0.139785	1
NM_001354983	DDR2	0.0571205	0.705055	1
NM_001254748	RGS5	-0.0111473	0.980893	1
NM_031423	NUF2	-0.0190093	0.980893	1
NM_006182	DDR2	0.129131	0.120126	1
NM_001354982	DDR2	0.106944	0.147757	1
NM_001174069	LMX1A	0.0657289	0.927485	1
NM_177398	LMX1A	0.0487078	0.912274	1
NM_001256570	RXRG	0.0849289	0.293174	1
NM_001320302	FAM78B	0.228618	0.24323	1
NM_012474	UCK2	-0.19419	0.608108	1
NM_001322924	RCSD1	0.1763	0.669781	1
NM_032858	MAEL	0.0844289	0.755495	1
NM_001286378	MAEL	-0.255259	0.0620407	1
NM_002697	POU2F1	0.378309	0.304797	1
NM_001198783	POU2F1	0.15704	0.889519	1
NM_052862	RCSD1	0.19229	0.614837	1
NM_001937	DPT	-0.0321226	0.777447	1
NM_001143674	MPC2	-0.124808	0.973252	1
NM_152902	TIPRL	0.131753	0.255123	1
NM_001349778	DCAF6	-0.302938	0.542693	1
NM_001349777	DCAF6	-0.179529	0.740967	1
NM_001320972	BLZF1	0.0978674	0.385279	1
NM_013330	NME7	0.0789251	0.530039	1
NM_001677	ATP1B1	-0.049588	0.996156	1
NM_001204517	KIFAP3	-0.0191449	0.626573	1
NM_001136107	NTMT2	0.190617	0.0769993	1
NM_022716	PRRX1	-0.0767311	0.417652	1
NM_001204514	KIFAP3	-0.041958	0.957979	1
NM_001460	FMO2	0.14511	0.874398	1
NM_001185127	VAMP4	-0.01174	0.866854	1
NM_002022	FMO4	0.215397	0.0518637	1
NM_001300851	RC3H1	-0.0380885	0.897095	1
NM_018122	DARS2	0.110279	0.26741	1
NM_178527	SLC9C2	0.204515	0.0722343	1
NM_014857	RABGAP1L	0.341832	0.0425479	1
NM_001330989	RABGAP1L	-0.183742	0.302116	1
NM_014412	CACYBP	-0.0560747	0.661109	1
NM_001243763	RABGAP1L	-0.26287	0.176816	1
NM_001035230	RABGAP1L	-0.0516619	0.9351	1
NM_001007214	CACYBP	-0.0267764	0.699938	1
NM_001328635	TNR	0.15563	0.167688	1
NM_001286164	ASTN1	-0.0396713	0.669781	1
NM_021936	PAPPA2	0.0578975	0.406689	1
NM_001356506	CRYZL2P-SEC16B	0.052028	0.965614	1
NM_152663	RALGPS2	-0.147124	0.297622	1
NM_001324310	FAM20B	0.0659459	0.814418	1
NM_001324311	FAM20B	0.0179889	0.80966	1
NM_001168238	ABL2	0.174988	0.805928	1
NM_014864	FAM20B	0.00934713	0.784804	1
NM_004841	RASAL2	0.16164	0.829327	1
NM_022347	TOR1AIP2	0.0419611	0.692829	1
NM_173533	TDRD5	-0.0415587	0.662808	1
NM_014810	CEP350	-0.345432	0.045172	1
NM_001329716	FAM163A	0.328248	0.164725	1
NM_001329714	FAM163A	-0.0745215	0.390567	1
NM_144696	AXDND1	-0.0289823	0.492987	1
NM_033343	LHX4	-0.280762	0.0506947	1
NM_001349933	TOR1AIP2	-0.0945669	0.889519	1
NM_001194999	MR1	0.0543655	0.536348	1
NM_004736	XPR1	0.326441	0.231728	1
NM_001205294	CACNA1E	-0.0494742	0.889519	1
NM_001357	DHX9	0.412941	0.117827	1
NM_170706	NMNAT2	0.165508	0.0722343	1
NM_002293	LAMC1	0.235357	0.942395	1
NM_015039	NMNAT2	-0.113403	0.56195	1
NM_052965	TSEN15	0.161962	0.480948	1
NM_015149	RGL1	0.0755227	0.588121	1
NM_001297671	RGL1	-0.0321866	0.919421	1
NM_052966	NIBAN1	-0.18266	0.912274	1
NM_025191	EDEM3	0.339616	0.0180156	1
NM_001105518	SWT1	0.288484	0.0183945	1
NM_017673	SWT1	0.234591	0.0382901	1
NM_001164246	ODR4	0.258024	0.174311	1
NM_031935	HMCN1	0.052638	0.517535	1
NM_001311193	PLA2G4A	0.0643451	0.792181	1
NM_001317188	BRINP3	0.0353198	0.927485	1
NM_199051	BRINP3	0.100983	0.26741	1
NM_130782	RGS18	-0.0656677	0.973252	1
NM_001319291		-0.153778	0.284409	1
NM_024529	CDC73	0.00961965	0.881953	1
NM_016066	GLRX2	0.262283	0.100645	1
NM_197962	GLRX2	-0.0654513	0.574966	1
NM_001243399	GLRX2	0.13323	0.46907	1
NM_006684	CFHR4	0.0265106	0.601413	1
NM_198503	KCNT2	-0.148567	0.330008	1
NM_001195215	DENND1B	-0.0563077	0.927485	1
NM_001193640	CRB1	-0.145917	0.170691	1
NM_001257965	CRB1	-0.249008	0.1618	1
NM_080921	PTPRC	-0.162172	0.703524	1
NM_205860	NR5A2	-0.198779	0.106841	1
NM_001276464	NR5A2	-0.0494692	0.777447	1
NM_203459	CAMSAP2	0.109028	0.950348	1
NM_001164586	IGFN1	-0.0913471	0.480948	1
NM_014875	KIF14	-0.0627854	0.717877	1
NM_001305792	KIF14	0.0526992	0.770109	1
NM_000069	CACNA1S	0.160807	0.090951	1
NM_004433	ELF3	-0.0519056	0.621597	1
NM_001167738	NAV1	-0.0990524	0.325248	1
NM_021636	LGR6	-0.0432022	0.919876	1
NM_001256129	ARL8A	0.334247	0.574966	1
NM_018085	IPO9	-0.159243	0.401272	1
NM_020443	NAV1	-0.484708	0.015649	1
NM_001193571	CSRP1	0.117196	0.445801	1
NM_001193570	CSRP1	0.101723	0.588121	1
NM_001193572	CSRP1	-0.00759479	0.912274	1
NM_001017404	LGR6	-0.0126313	0.829327	1
NM_001017403	LGR6	-0.153753	0.897095	1
NM_177402	SYT2	-0.130348	0.275821	1
NM_006618	KDM5B	0.123648	0.0323113	1
NM_032104	PPP1R12B	0.0113728	0.996178	1
NM_001304331	PPFIA4	-0.115759	0.733737	1
NM_001319239	ZC3H11A	-0.0579064	0.683809	1
NM_001684	ATP2B4	-0.152228	0.199528	1
NM_005686	SOX13	-0.0421054	0.555495	1
NM_014935	PLEKHA6	0.120078	0.0648253	1
NM_015090	NFASC	-0.145331	0.220613	1
NM_001199052	LEMD1	0.0114686	0.480948	1
NM_199462	DSTYK	0.0673639	0.457353	1
NM_201630	LRRN2	-0.210222	0.132144	1
NM_006338	LRRN2	-0.172478	0.275821	1
NM_001276320	YOD1	-0.0832506	0.549076	1
NM_005449	FCMR	0.204813	0.0506947	1
NM_001193338	FCMR	0.206955	0.0567649	1
NM_182664	RASSF5	-0.345073	0.0264652	1
NM_025179	PLXNA2	-0.0487324	0.574966	1
NM_175710	CR1L	-0.0704682	0.601413	1
NM_000651	CR1	-0.240381	0.344553	1
NM_153262	SYT14	-0.219351	0.385279	1
NM_001206696	IRF6	-0.220279	0.202937	1
NM_172362	KCNH1	0.026444	0.799575	1
NM_001199809	INTS7	0.02764	0.474989	1
NM_014873	LPGAT1	0.304964	0.374835	1
NM_006243	PPP2R5A	-0.248055	0.582867	1
NM_001320808	LPGAT1	0.33773	0.117827	1
NM_001349671	RPS6KC1	-0.181347	0.642066	1
NM_002763	PROX1	-0.156513	0.164725	1
NM_016343	CENPF	-0.116577	0.275821	1
NM_005401	PTPN14	0.0498846	0.829327	1
NM_001270616	PROX1	-0.0620845	0.912274	1
NM_016121	KCTD3	-0.0301156	0.683809	1
NM_001017424	KCNK2	-0.10358	0.164725	1
NM_014217	KCNK2	-0.186423	0.0786427	1
NM_001438	ESRRG	0.110873	0.428786	1
NM_001243514	ESRRG	-0.0123284	0.621597	1
NM_018040	GPATCH2	0.00135581	0.90468	1
NM_138796	SPATA17	0.0519085	0.697947	1
NM_016052	RRP15	0.114329	0.26741	1
NM_001286128	MARK1	-0.2151	0.412149	1
NM_012414	RAB3GAP2	-0.185825	0.406689	1
NM_022746	MTARC1	0.294537	0.134086	1
NM_007207	DUSP10	-0.0856308	0.0837352	1
NM_032890	DISP1	-0.0474997	0.980893	1
NM_001324064	MIA3	0.172351	0.505183	1
NM_001300867	MIA3	0.0561389	0.792181	1
NM_001143962	CAPN8	0.213454	0.216993	1
NM_005426	TP53BP2	0.0050813	0.654146	1
NM_001037175	SUSD4	0.0358714	0.648951	1
NM_001322304	CNIH3	-0.226663	0.195025	1
NM_001322305	CNIH3	-0.234866	0.549076	1
NM_018212	ENAH	0.05403	0.480948	1
NM_001130440	SRP9	0.0736017	0.72653	1
NM_022735	ACBD3	0.453031	0.194976	1
NM_003607	CDC42BPA	0.604706	0.362574	0.411324
NM_020247	COQ8A	0.0385056	0.599523	1
NM_002221	ITPKB	0.0465129	0.843429	1
NM_001003665	STUM	0.363096	0.0872876	1
NM_001098623	OBSCN	0.204063	0.0691924	1
NM_001323935	SNAP47	-0.338482	0.209881	1
NM_001323933	SNAP47	-0.127312	0.792181	1
NM_033131	WNT3A	-0.394752	0.0803142	1
NM_001323934	SNAP47	-0.558392	0.0820142	0.132334
NM_001323932	SNAP47	-0.238235	0.344553	1
NM_178549	ZNF678	0.0326901	0.72653	1
NM_004481	GALNT2	-0.37233	0.206877	1
NM_014777	URB2	0.298006	0.224275	1
NM_001258311	PGBD5	-0.309103	0.318668	1
NM_001291866	GALNT2	0.156437	0.0620407	1
NM_175876	EXOC8	0.129016	0.434416	1
NM_024525	TTC13	-0.223912	0.739592	1
NM_001300889	TRIM67	0.231066	0.219292	1
NM_001145036	COG2	0.0340997	0.621597	1
NM_001164537	DISC1	0.0327747	0.957979	1
NM_014801	PCNX2	0.128855	0.762792	1
NM_173508	SLC35F3	0.00187604	0.792181	1
NM_001300845	SLC35F3	-0.0643342	0.762792	1
NM_001206794	ARID4B	-0.299998	0.461004	1
NM_001098722	GNG4	-0.00288548	0.814418	1
NM_001098721	GNG4	-0.165817	0.395898	1
NM_031371	ARID4B	-0.366595	0.280554	1
NM_152490	B3GALNT2	-0.392735	0.080346	1
NM_014765	TOMM20	-0.10416	0.957979	1
NM_003193	TBCE	0.278716	0.0307558	1
NM_201545	LGALS8	0.0913104	0.26741	1
NM_201544	LGALS8	0.116573	0.401272	1
NM_201543	LGALS8	0.105392	0.601413	1
NM_080738	EDARADD	-0.0215813	0.859322	1
NM_002508	NID1	0.173797	0.844296	1
NM_145861	EDARADD	-0.0349332	0.912274	1
NM_018072	HEATR1	-0.0401106	0.799575	1
NM_003272	GPR137B	-0.0564927	0.334812	1
NM_001035	RYR2	-0.0964131	0.145717	1
NM_001347716	CHRM3	0.173161	0.380035	1
NM_000740	CHRM3	0.128746	0.216993	1
NM_001305424	FMN2	0.221326	0.581526	1
NM_144625	WDR64	0.0977186	0.288769	1
NM_003679	KMO	0.232225	0.844296	1
NM_152666	PLD5	-0.296	0.0264652	1
NM_001195811	PLD5	-0.0810797	0.474989	1
NM_001206729	AKT3	-0.056824	0.762792	1
NM_014812	CEP170	-0.395927	0.153891	1
NM_001350246	SDCCAG8	-0.161894	0.220613	1
NM_181690	AKT3	0.00968983	0.851802	1
NM_032328	EFCAB2	0.0342805	0.768864	1
NM_001290327	EFCAB2	-0.0457873	0.52483	1
NM_001130957	CATSPERE	0.195579	0.496986	1
NM_001297746	DESI2	-0.261815	0.733737	1
NM_001126	ADSS2	-0.0520197	0.859322	1
NM_033213	ZNF670	0.212657	0.139785	1
NM_001297569	ZNF124	0.508017	0.0148167	0.0555953
NM_001323342	AHCTF1	0.0840588	0.669781	1
NM_015446	AHCTF1	-0.051799	0.792181	1
NM_001139459	CNST	-0.054759	0.897095	1
NM_001127462	NLRP3	0.0397537	0.770109	1
NM_001304535	OR2L13	-0.0862874	0.912274	1
NM_001281853	GCSAML	0.0185336	0.74822	1
NM_001281837	GCSAML	0.433966	0.0593547	1
NM_145278	GCSAML	-0.257095	0.0102878	1
NM_001127461	NLRP3	-0.0211465	0.621597	1
NM_001005484	OR4F5	0.0905266	0.9351	1
NM_001005277	OR4F16	0.0219519	0.836804	1
NM_001005277	OR4F16	0.151585	0.712189	1
NM_152486	SAMD11	0.254426	0.251115	1
NM_001160184	PLEKHN1	0.278526	0.0837428	1
NM_001291367	PERM1	-0.0448724	0.642066	1
NM_015658	NOC2L	0.0976145	0.866107	1
NM_198317	KLHL17	-0.0701375	0.911759	1
NM_001205252	RNF223	0.140842	0.374835	1
NM_198576	AGRN	0.440822	0.328092	1
NM_021170	HES4	-0.0424813	0.636841	1
NM_005101	ISG15	-0.275941	0.51134	1
NM_001130045	TTLL10	0.382636	0.000959637	1
NM_153254	TTLL10	0.30285	0.0677109	1
NM_016176	SDF4	0.035266	0.996156	1
NM_004195	TNFRSF18	-0.0737286	0.474989	1
NM_080605	B3GALT6	0.145177	1	1
NM_003327	TNFRSF4	-0.0336571	0.492987	1
NM_017871	INTS11	-0.271207	0.0100984	1
NM_030649	ACAP3	0.336812	0.619747	1
NM_001346116	PUSL1	0.173299	0.661079	1
NM_152228	TAS1R3	0.0591935	0.517535	1
NM_032348	MXRA8	-0.112815	0.115563	1
NM_001127230	AURKAIP1	-0.262309	0.32102	1
NM_058167	UBE2J2	-0.139055	0.435129	1
NM_001127229	AURKAIP1	-0.247612	0.34753	1
NM_004421	DVL1	-0.398657	0.0872041	1
NM_001282582	MXRA8	-0.196475	0.224275	1
NM_001282583	MXRA8	-0.0464939	0.821864	1
NM_001282585	MXRA8	-0.1572	0.090951	1
NM_001130413	SCNN1D	0.145807	0.0947356	1
NM_001029885	CPTP	-0.208826	0.0770639	1
NM_022834	VWA1	-0.00825549	0.777447	1
NM_001320153	CCNL2	-0.227862	0.728707	1
NM_001145210	ANKRD65	-0.00523367	0.973252	1
NM_001318485	MRPL20	-0.145317	0.874398	1
NM_031921	ATAD3B	0.0411414	0.988469	1
NM_001350497	CCNL2	-0.23184	0.401272	1
NM_001146685	TMEM88B	0.0946052	0.145063	1
NM_001317238	ATAD3B	0.206934	0.019917	1
NM_001039211	ATAD3C	0.0625571	0.829327	1
NM_014188	SSU72	0.0190244	0.505183	1
NM_018188	ATAD3A	-0.43962	0.0406232	1
NM_001170536	ATAD3A	-0.509506	0.0105868	0.0487233
NM_001242659	FNDC10	0.260418	0.306653	1
NM_001170689	MIB2	-0.0342875	0.762792	1
NM_006983	MMP23B	-0.0426131	0.269948	1
NM_080875	MIB2	0.0441211	0.518569	1
NM_001114748	TMEM240	-0.296585	0.768864	1
NM_001198995	NADK	-0.297898	0.00123522	1
NM_001290264	SLC35E2B	-0.119326	0.772552	1
NM_033529	CDK11A	-0.20014	0.195018	1
NM_182838	SLC35E2A	-0.305641	0.478848	1
NM_001282538	GNB1	-0.592471	0.0638906	0.115516
NM_001304360	CFAP74	-0.0932137	0.635212	1
NM_138705	CALML6	0.0981276	0.170691	1
NM_178545	TMEM52	0.275798	0.0753836	1
NM_000815	GABRD	0.112884	0.251115	1
NM_001146310	FAAP20	0.0552583	0.626579	1
NM_001256947	FAAP20	0.0660192	0.282698	1
NM_001282670	FAAP20	-0.155822	0.255123	1
NM_002617	PEX10	-0.249151	0.380035	1
NM_024848	MORN1	-0.105757	0.388524	1
NM_007033	RER1	-0.142618	0.295859	1
NM_001303013	PLCH2	0.0487259	0.784804	1
NM_018216	PANK4	0.0428626	0.59475	1
NM_001303012	PLCH2	0.102714	0.206388	1
NM_001010926	HES5	0.0173301	0.950065	1
NM_152371	PRXL2B	0.223396	0.352506	1
NM_033467	MMEL1	0.129609	0.293174	1
NM_080431	ACTRT2	0.0311441	0.980893	1
NM_014448	ARHGEF16	0.0488091	0.669781	1
NM_182752	TPRG1L	0.380119	0.332905	1
NM_001126241	TP73	0.164277	0.216993	1
NM_017818	WRAP73	-0.123418	0.980784	1
NM_001204192	TP73	0.00620583	0.950348	1
NM_001204188	TP73	0.0137018	0.792181	1
NM_001163724	SMIM1	-0.273098	0.614837	1
NM_020710	LRRC47	0.306322	0.261679	1
NM_014704	CEP104	-0.0308523	0.754186	1
NM_001288583	SMIM1	-0.245371	0.74822	1
NM_207356	C1orf174	-0.00399321	0.601413	1
NM_207396	RNF207	-0.153513	0.344553	1
NM_015557	CHD5	0.0805243	0.843426	1
NM_000983	RPL22	0.22102	0.183102	1
NM_207370	GPR153	-0.14718	0.334812	1
NM_181866	ACOT7	-0.10805	0.517535	1
NM_181865	ACOT7	-0.0733735	0.523768	1
NM_001024598	HES3	0.28719	0.202937	1
NM_001042665	PLEKHG5	-0.00247374	0.579586	1
NM_001042664	PLEKHG5	-0.076538	0.973252	1
NM_148967	TNFRSF25	-0.044466	0.988535	1
NM_001265593	PLEKHG5	0.021365	0.927485	1
NM_019089	HES2	0.441626	0.253578	1
NM_020631	PLEKHG5	0.148749	0.395898	1
NM_001265594	PLEKHG5	-0.0689033	0.90468	1
NM_031475	ESPN	-0.199119	0.297622	1
NM_024654	NOL9	0.108582	0.566469	1
NM_138697	TAS1R1	0.101932	0.719347	1
NM_001278648	ZBTB48	0.125891	0.690865	1
NM_014851	KLHL21	-0.214399	0.295833	1
NM_153812	PHF13	-0.55242	0.126252	0.181965
NM_138350	THAP3	-0.107615	0.51134	1
NM_001195753	THAP3	-0.0258931	0.761516	1
NM_018198	DNAJC11	-0.0399589	0.683809	1
NM_001349619	CAMTA1	-0.532443	0.018408	0.0613022
NM_001349618	CAMTA1	-0.492043	0.0453113	0.0923171
NM_001349616	CAMTA1	-0.495325	0.0237954	0.0676007
NM_001349615	CAMTA1	-0.517455	0.0231751	0.066898
NM_001349613	CAMTA1	-0.116065	0.942722	1
NM_001349622	CAMTA1	-0.500928	0.0256724	0.0676007
NM_001349626	CAMTA1	-0.481505	0.041865	1
NM_004781	VAMP3	-0.20266	0.259175	1
NM_021995	UTS2	-0.233594	0.058048	1
NM_006786	UTS2	-0.300267	0.0473178	1
NM_007262	PARK7	-0.0712126	0.642066	1
NM_018948	ERRFI1	-0.712337	0.019917	0.0625697
NM_001042682	RERE	-0.417472	0.0542687	1
NM_001270501	CA6	-0.100053	0.315862	1
NM_001201483	ENO1	-0.308623	0.21569	1
NM_001328619	SLC2A5	0.0197497	0.988535	1
NM_001328621	SLC2A5	-0.0837173	0.59475	1
NM_207420	SLC2A7	-0.0323118	0.628389	1
NM_025106	SPSB1	-0.546685	0.0677109	0.119751
NM_001130924	TMEM201	-0.305936	0.251115	1
NM_032315	SLC25A33	0.00646742	0.874398	1
NM_005026	PIK3CD	0.0608728	0.486948	1
NM_001350235	PIK3CD	0.160096	0.284409	1
NM_001350234	PIK3CD	0.00407474	0.132144	1
NM_052960	RBP7	0.0523367	0.858534	1
NM_001297778	NMNAT1	0.122801	0.601413	1
NM_022787	NMNAT1	-0.0507304	0.280093	1
NM_001304452	PGD	-0.136927	0.777447	1
NM_001304451	PGD	-0.188107	0.423198	1
NM_001270517	CENPS-CORT	0.155857	0.9351	1
NM_001243768	CENPS-CORT	0.085932	0.784804	1
NM_004401	DFFA	-0.0715228	0.829327	1
NM_001302	CORT	-0.0192467	0.927485	1
NM_139208	MASP2	0.0117247	0.980893	1
NM_007375	TARDBP	0.129189	0.633424	1
NM_003132	SRM	0.074253	0.957979	1
NM_021146	ANGPTL7	-0.0426914	0.919876	1
NM_001330350	UBIAD1	0.0812166	0.362574	1
NM_020780	DISP3	0.106048	0.440088	1
NM_006341	MAD2L2	0.0939343	0.705055	1
NM_001330355	FBXO44	-0.591587	0.0183945	0.0613022
NM_012168	FBXO2	-0.559647	0.0264652	0.068639
NM_018438	FBXO6	-0.0812296	0.896513	1
NM_001127325	MAD2L2	0.135506	0.440088	1
NM_001304791	FBXO44	-0.462641	0.043108	1
NM_198545	DRAXIN	0.204276	0.22798	1
NM_006172	NPPA	0.0973638	0.499065	1
NM_001330358	MTHFR	0.0987373	0.549076	1
NM_001286	CLCN6	0.215648	0.0872876	1
NM_002521	NPPB	-0.0595348	0.542693	1
NM_005957	MTHFR	0.20853	0.0947356	1
NM_001010881	C1orf167	-0.147535	0.0891043	1
NM_001316320	PLOD1	-0.00138214	0.896513	1
NM_138346	KIAA2013	-0.280674	0.33773	1
NM_021933	MIIP	0.159729	0.328117	1
NM_001066	TNFRSF1B	0.186283	0.314023	1
NM_001324370	DHRS3	-0.0333028	0.635212	1
NM_004753	DHRS3	-0.270616	0.0620407	1
NM_001319225	DHRS3	-0.127517	0.542693	1
NM_001103170	AADACL3	0.0927291	0.536348	1
NM_001080830	PRAMEF12	0.0599583	0.235519	1
NM_152290	CFAP107	-0.0840295	0.499065	1
NM_001146344	PRAMEF11	0.0763707	0.517535	1
NM_023014	PRAMEF2	0.0237484	0.897095	1
NM_023013	PRAMEF1	0.12933	0.0737954	1
NM_001302551	HNRNPCL4	0.172989	0.0567649	1
NM_001146181	HNRNPCL3	0.156292	0.0677109	1
NM_001294139	PRAMEF1	-0.0237475	0.655865	1
NM_001013631	HNRNPCL1	0.169198	0.0462346	1
NM_001009611	PRAMEF4	0.0788809	0.137202	1
NM_001099850	PRAMEF18	-0.00454922	0.980893	1
NM_001300891	PRAMEF27	0.132298	0.33966	1
NM_001012277	PRAMEF7	0.109324	0.179939	1
NM_001010889	PRAMEF6	0.0698689	0.697947	1
NM_001136561	HNRNPCL2	0.304107	0.0031085	1
NM_001013407	PRAMEF5	-0.0537743	0.499065	1
NM_001300891	PRAMEF27	-0.00816916	0.973252	1
NM_001013407	PRAMEF5	-0.135103	0.19616	1
NM_001010889	PRAMEF6	-0.134912	0.235519	1
NM_001024661	PRAMEF14	0.144787	0.344553	1
NM_001099790	PRAMEF19	-0.0357046	0.836804	1
NM_001099851	PRAMEF17	-0.0630896	0.733737	1
NM_001300891	PRAMEF27	-0.0870073	0.417652	1
NM_001098376	PRAMEF15	0.209527	0.0315254	1
NM_001291381	PRAMEF33	0.00385975	0.988535	1
NM_001039361	PRAMEF10	0.0235133	0.777447	1
NM_001012277	PRAMEF7	0.120173	0.19616	1
NM_001099852	PRAMEF20	0.102747	0.199528	1
NM_001012277	PRAMEF7	-0.123833	0.633424	1
NM_001024661	PRAMEF14	-0.00683303	0.851802	1
NM_001099852	PRAMEF20	0.0261184	0.889519	1
NM_001099851	PRAMEF17	-0.099988	0.474989	1
NM_001300891	PRAMEF27	0.180289	0.0473178	1
NM_001098376	PRAMEF15	0.0761678	0.445801	1
NM_001010847	LRRC38	0.042061	0.799575	1
NM_006474	PDPN	-0.0355748	0.457353	1
NM_001006625	PDPN	0.227644	0.0209913	1
NM_015866	PRDM2	0.184289	0.147757	1
NM_001135610	PRDM2	0.187836	0.090951	1
NM_001007257	PRDM2	0.295345	0.0778622	1
NM_001278501	TMEM51-AS2	-0.0822492	0.72653	1
NM_001136218	TMEM51	-0.0433798	0.814418	1
NM_001136217	TMEM51	0.15372	0.080346	1
NM_001319665	TMEM51	-0.0411053	0.881953	1
NM_024329	EFHD2	-0.3433	0.0555052	1
NM_007272	CTRC	0.183504	0.192834	1
NM_001229	CASP9	-0.227179	0.410052	1
NM_015849	CELA2B	-0.192712	0.115563	1
NM_033440	CELA2A	-0.129689	0.15326	1
NM_032996	CASP9	-0.258773	0.257581	1
NM_032341	DDI2	0.0911021	0.189549	1
NM_024758	AGMAT	0.165071	0.380035	1
NM_006511	RSC1A1	-0.0277421	0.428786	1
NM_015164	PLEKHM2	-0.0537188	0.158915	1
NM_207348	SLC25A34	0.290022	0.013267	1
NM_001350151	FBLIM1	-0.108475	0.186305	1
NM_017556	FBLIM1	0.266679	0.705055	1
NM_001024215	FBLIM1	-0.0311403	0.46907	1
NM_001013641	TMEM82	-0.256508	0.173734	1
NM_001089591	UQCRHL	-0.0332063	0.740967	1
NM_001349685	HSPB7	-0.361199	0.00585583	1
NM_001349682	HSPB7	-0.187928	0.122459	1
NM_001257139	CLCNKA	-0.00224903	0.912274	1
NM_001242884	ZBTB17	-0.175833	0.209881	1
NM_001165945	CLCNKB	0.00460436	0.942722	1
NM_178840	SRARP	0.084059	0.34949	1
NM_000085	CLCNKB	0.128252	0.445801	1
NM_004431	EPHA2	-0.128927	0.517535	1
NM_182623	FAM131C	0.200621	0.463191	1
NM_030907	CPLANE2	-0.160324	0.417652	1
NM_153213	ARHGEF19	0.141415	0.186305	1
NM_001353349	SPATA21	0.0529653	0.255123	1
NM_001114600	SZRD1	-0.150825	0.222928	1
NM_001310155		-0.00797051	0.973252	1
NM_001310138		0.00023046	0.836804	1
NM_001271733	MST1L	0.0244792	0.676781	1
NM_001310138		-0.0560396	0.912274	1
NM_014675	CROCC	0.00380331	0.733737	1
NM_001141973	ATP13A2	-0.363445	0.115563	1
NM_003000	SDHB	0.199212	0.15049	1
NM_012387	PADI4	0.0637344	0.669781	1
NM_016233	PADI3	-0.0651758	0.412149	1
NM_018715	RCC2	0.0872677	0.440088	1
NM_001136204	RCC2	0.196276	0.965414	1
NM_207421	PADI6	0.282917	0.00585583	1
NM_152375	KLHDC7A	0.0381455	0.648951	1
NM_003748	ALDH4A1	-0.20764	0.505183	1
NM_152232	TAS1R2	0.00261618	0.733737	1
NM_001161504	ALDH4A1	-0.149834	0.0392157	1
NM_001348421	AKR7L	-0.0785415	0.669781	1
NM_012067	AKR7A3	0.108126	0.474989	1
NM_016183	MRTO4	-0.0204661	0.486948	1
NM_015047	EMC1	-0.00236057	0.530039	1
NM_001040125	SLC66A1	0.0028662	0.690865	1
NM_001320979	AKR7A2	-0.0187681	0.601413	1
NM_001204088	MICOS10-NBL1	0.050712	0.588121	1
NM_001204084	NBL1	-0.0440356	0.965614	1
NM_001278165	NBL1	-0.0304215	0.836804	1
NM_001278164	NBL1	0.0243327	0.980893	1
NM_001204085	NBL1	-0.14959	0.278412	1
NM_001204086	NBL1	-0.254227	0.0691924	1
NM_005380	NBL1	-0.077924	0.980893	1
NM_001278166	NBL1	-0.0872953	0.784804	1
NM_000871	HTR6	-0.0634018	0.198366	1
NM_019062	RNF186	-0.074749	0.542693	1
NM_001349115	TMCO4	0.0960653	0.445801	1
NM_001161729	PLA2G2A	-0.0788843	0.380035	1
NM_001161728	PLA2G2A	-0.0175863	0.889519	1
NM_015207	OTUD3	0.0939649	0.588121	1
NM_014589	PLA2G2E	-0.0214339	0.480948	1
NM_012400	PLA2G2D	-0.0179758	0.770109	1
NM_000929	PLA2G5	-0.0078051	0.770109	1
NM_001316722	PLA2G2C	-0.0966811	0.34949	1
NM_022819	PLA2G2F	0.0956151	0.117827	1
NM_152376	UBXN10	0.435199	0.0473178	1
NM_001039500	VWA5B1	0.0639749	0.480948	1
NM_018584	CAMK2N1	0.0697064	0.755495	1
NM_024544	MUL1	0.195888	0.199528	1
NM_207334	FAM43B	0.167293	0.106841	1
NM_001785	CDA	0.0765276	0.202937	1
NM_001103161	SH2D5	-0.256122	0.186305	1
NM_020816	KIF17	-0.1564	0.854753	1
NM_005216	DDOST	-0.128681	0.549076	1
NM_001113349	ECE1	-0.198528	0.770109	1
NM_001113347	ECE1	0.171668	0.19616	1
NM_001397	ECE1	-0.195694	1	1
NM_032264	NBPF3	-0.116542	0.712189	1
NM_001350524	RAP1GAP	-0.116353	0.829327	1
NM_001145658	RAP1GAP	0.18706	0.186305	1
NM_007352	CELA3B	-0.199896	0.173734	1
NM_005747	CELA3A	0.0301494	0.90468	1
NM_030761	WNT4	-0.223178	0.213416	1
NM_020526	EPHA8	-0.473201	0.0152279	1
NM_001347620	C1QC	-0.0707092	0.549076	1
NM_001347466	C1QA	0.0727543	0.536348	1
NM_001347465	C1QA	0.110139	0.328117	1
NM_000491	C1QB	0.111168	0.26741	1
NM_001289974	LACTBL1	-0.135764	0.117827	1
NM_001242521	TEX46	-0.18898	0.486948	1
NM_015013	KDM1A	-0.367391	0.124828	1
NM_000864	HTR1D	0.0660445	0.33966	1
NM_001297620	HNRNPR	-0.0649036	0.22292	1
NM_030634	ZNF436	-0.161486	0.642066	1
NM_001077195	ZNF436	0.107467	0.523768	1
NM_017707	ASAP3	0.303358	0.0305435	1
NM_001348075	MDS2	0.0127639	0.690865	1
NM_002167	ID3	-0.0582477	0.635212	1
NM_003198	ELOA	-0.12842	0.509273	1
NM_001199802	RPL11	0.0302695	0.306653	1
NM_020362	PITHD1	0.116156	0.445801	1
NM_007260	LYPLA2	0.0736976	0.662808	1
NM_001841	CNR2	-0.0773834	0.851802	1
NM_001166059	HMGCL	0.146641	0.177387	1
NM_001127621	GALE	0.257341	0.191726	1
NM_001008216	GALE	0.0148222	0.669781	1
NM_000403	GALE	0.132696	0.496986	1
NM_000147	FUCA1	0.305634	0.0356227	1
NM_001191009	SRSF10	-0.357676	0.0555052	1
NM_017761	PNRC2	-0.224938	0.390567	1
NM_152372	MYOM3	-0.181635	0.451557	1
NM_021258	IL22RA1	-0.1099	0.259175	1
NM_198174	GRHL3	-0.155041	0.213416	1
NM_001195010	GRHL3	-0.16481	0.156068	1
NM_001199013	STPG1	0.0960276	0.33966	1
NM_001199012	STPG1	0.0286526	0.836804	1
NM_021180	GRHL3	0.0112605	0.897095	1
NM_013441	RCAN3	-0.241916	0.136607	1
NM_001251980	RCAN3	0.263858	0.0285419	1
NM_001251979	RCAN3	-0.15079	0.32102	1
NM_001251978	RCAN3	-0.0901402	0.364565	1
NM_005839	SRRM1	-0.0598155	0.95774	1
NM_001303449	SRRM1	-0.112108	0.612985	1
NM_004350	RUNX3	0.187154	0.927072	1
NM_001320672	RUNX3	0.0100947	0.480948	1
NM_207170	SYF2	0.0712516	0.466973	1
NM_001282867	RHD	-0.0701838	0.311235	1
NM_020317	RSRP1	0.163232	0.626573	1
NM_001321772	RSRP1	0.269348	0.0226893	1
NM_014313	TMEM50A	0.246009	0.0445528	1
NM_015627	LDLRAP1	0.0196308	0.599523	1
NM_178422	PAQR7	0.1132	0.293174	1
NM_019557	MTFR1L	-0.545297	0.14175	0.193949
NM_024037	AUNIP	-0.281898	0.359496	1
NM_020451	SELENON	-0.192412	0.457353	1
NM_001099627	MTFR1L	-0.450752	0.235519	1
NM_001099626	MTFR1L	-0.360245	0.505183	1
NM_203401	STMN1	-0.230449	0.145063	1
NM_203399	STMN1	-0.112998	0.401272	1
NM_000437	PAFAH2	-0.179697	0.0947356	1
NM_152835	PDIK1L	-0.22278	0.395898	1
NM_004455	EXTL1	-0.162759	0.156068	1
NM_032513	SLC30A2	0.104608	0.176816	1
NM_001243532	PDIK1L	-0.166321	0.635212	1
NM_032588	TRIM63	-0.021579	0.369678	1
NM_015871	ZNF593	-0.0431084	0.608108	1
NM_024869	FAM110D	-0.198591	0.045172	1
NM_001297648	CNKSR1	-0.0196892	0.536348	1
NM_198137	CATSPER4	0.050181	0.792181	1
NM_001319944	CEP85	-0.132781	0.492987	1
NM_001281518	CEP85	-0.082599	0.492987	1
NM_001307925	ZNF683	-0.110854	0.480948	1
NM_145345	UBXN11	-0.172713	0.26327	1
NM_001803	CD52	-0.207894	0.19616	1
NM_183008	UBXN11	-0.071969	0.821864	1
NM_001039775	CRYBG2	0.167032	0.147757	1
NM_205861	DHDDS	-0.184063	0.106841	1
NM_005517	HMGN2	0.0473143	0.814418	1
NM_001006665	RPS6KA1	-0.393638	0.127231	1
NM_001202554	PIGV	0.18062	0.59475	1
NM_017837	PIGV	0.220175	0.380035	1
NM_006015	ARID1A	-0.306142	0.0569412	1
NM_021969	NR0B2	-0.316302	0.275821	1
NM_022078	GPATCH3	-0.0414983	0.59475	1
NM_032283	ZDHHC18	-0.272397	0.231728	1
NM_018066	GPN2	0.278131	0.0753836	1
NM_006142	SFN	0.0846975	0.480948	1
NM_152365	KDF1	0.129416	0.222928	1
NM_052943	TENT5B	0.0346264	0.896513	1
NM_001013642	TRNP1	0.303109	0.106841	1
NM_003047	SLC9A1	0.00467733	0.9351	1
NM_015023	WDTC1	0.00441316	0.293174	1
NM_004672	MAP3K6	-0.170252	0.354471	1
NM_207397	CD164L2	-0.060955	0.777447	1
NM_032872	SYTL1	-0.00599088	0.621597	1
NM_005281	GPR3	0.19407	0.115563	1
NM_003665	FCN3	-0.034409	0.927485	1
NM_005248	FGR	-0.101898	0.719347	1
NM_002038	IFI6	0.138942	0.364565	1
NM_001042747	FGR	-0.0636236	0.302116	1
NM_001042729	FGR	-0.126219	0.115563	1
NM_002713	PPP1R8	-0.126713	0.374835	1
NM_152660	FAM76A	-0.0336109	0.33966	1
NM_177424	STX12	-0.1517	0.192834	1
NM_014110	PPP1R8	-0.149664	0.255123	1
NM_018053	XKR8	-0.234337	0.0542687	1
NM_001286113	THEMIS2	-0.190373	0.517535	1
NM_001286076	RPA2	-0.0425617	0.725086	1
NM_014474	SMPDL3B	0.134145	0.202937	1
NM_016311	ATP5IF1	0.0397789	0.829327	1
NM_014280	DNAJC8	0.0969174	0.354471	1
NM_001164723	PTAFR	-0.156952	0.423198	1
NM_001164722	PTAFR	0.0557051	0.705055	1
NM_031459	SESN2	0.220921	0.115563	1
NM_001127350	MED18	-0.240523	0.247151	1
NM_023923	PHACTR4	-0.177836	0.19616	1
NM_017846	TRNAU1AP	0.443192	0.00194557	1
NM_152304	RAB42	0.0931796	0.302116	1
NM_001193532	RAB42	0.153849	0.111135	1
NM_001269	RCC1	-0.0144051	0.897095	1
NM_001319674	GMEB1	0.0690311	0.515468	1
NM_001172828	YTHDF2	-0.0441842	0.401912	1
NM_016258	YTHDF2	0.0185202	0.315862	1
NM_001173128	YTHDF2	0.0226706	0.293174	1
NM_000911	OPRD1	-0.0608588	0.859322	1
NM_001171868	TMEM200B	0.602596	0.0488025	0.0964148
NM_001003682	TMEM200B	0.3565	0.421106	1
NM_001349717	MECR	0.071318	0.655865	1
NM_006762	LAPTM5	0.168201	0.164725	1
NM_014654	SDC3	0.0362015	0.255123	1
NM_024522	NKAIN1	-0.072038	0.635212	1
NM_016505	ZCCHC17	0.10649	0.374835	1
NM_004814	SNRNP40	0.059092	0.401272	1
NM_004102	FABP3	0.00779572	0.844296	1
NM_018565	SERINC2	-0.0572377	0.581526	1
NM_001199038	SERINC2	0.0696554	0.505183	1
NM_001199037	SERINC2	0.108974	0.0855005	1
NM_178865	SERINC2	-0.0395391	0.950348	1
NM_001204414	TINAGL1	0.109546	0.434416	1
NM_001525	HCRTR1	0.0404832	0.950348	1
NM_012392	PEF1	-0.0605006	0.676781	1
NM_001204415	TINAGL1	0.0597379	0.676781	1
NM_001294335	ADGRB2	0.459042	0.043108	1
NM_001856	COL16A1	0.221619	0.0364939	1
NM_144569	SPOCD1	-0.0624852	0.770109	1
NM_001319679	TMEM39B	0.0855649	0.896513	1
NM_001319677	TMEM39B	0.182117	0.104743	1
NM_005356	LCK	-0.0642594	0.51134	1
NM_032648	FAM167B	0.216681	0.0947356	1
NM_001301011	CCDC28B	0.0185935	0.90468	1
NM_175852	TXLNA	0.0728909	0.56844	1
NM_019118	TMEM234	-0.0972663	0.46907	1
NM_018134	IQCC	-0.0414449	0.784804	1
NM_003757	EIF3I	-0.194319	0.179939	1
NM_001099434	DCDC2B	-0.0146589	0.59475	1
NM_001042771	LCK	-0.204345	0.0315254	1
NM_001143888	BSDC1	-0.00249353	0.635212	1
NM_023009	MARCKSL1	-0.190093	0.137202	1
NM_052841	TSSK3	0.0576458	0.896508	1
NM_001167676	FAM229A	0.0616041	0.896508	1
NM_001145720	ZBTB8B	0.0864865	0.0769993	1
NM_001308135	ZBTB8OS	-0.0697276	0.859322	1
NM_005610	RBBP4	-0.0509159	0.421106	1
NM_001135256	RBBP4	0.178128	0.761512	1
NM_020888	KIAA1522	0.190894	0.23033	1
NM_003680	YARS1	0.0177456	0.965614	1
NM_001198972	KIAA1522	-0.199367	0.1618	1
NM_153756	FNDC5	0.0721455	0.601413	1
NM_033504	TMEM54	-0.22376	0.156068	1
NM_002143	HPCA	-0.032134	0.574966	1
NM_001171941	FNDC5	0.0536133	0.648951	1
NM_001319143	AK2	-0.114561	0.364565	1
NM_018207	TRIM62	0.2215	0.23033	1
NM_001330483	TRIM62	-0.016307	0.792181	1
NM_001080438	A3GALT2	0.0116357	0.843429	1
NM_004427	PHC2	-0.098968	0.553497	1
NM_152493	ZNF362	-0.145062	0.599517	1
NM_145205	HMGB4	0.329732	0.00013958	1
NM_001352984	HMGB4	0.00455851	0.957979	1
NM_032884	C1orf94	-0.352664	0.0634205	1
NM_001134734	C1orf94	-0.20806	0.474989	1
NM_005268	GJB5	0.0105343	0.996178	1
NM_024009	GJB3	0.183425	0.690865	1
NM_153212	GJB4	0.0310986	0.762792	1
NM_001005752	GJB3	0.113814	0.628389	1
NM_002060	GJA4	0.0810828	0.614837	1
NM_001320261	SMIM12	0.100588	0.22798	1
NM_001164825	SMIM12	0.122422	0.189549	1
NM_001164824	SMIM12	0.0636774	0.829327	1
NM_001195156	TMEM35B	-0.0027906	0.806988	1
NM_007167	ZMYM6	-0.217264	0.499065	1
NM_001289089	ZMYM1	0.16864	0.0606856	1
NM_001289088	ZMYM1	0.0439161	0.821864	1
NM_014284	NCDN	0.146554	0.633424	1
NM_001199780	PSMB2	0.0339083	0.505183	1
NM_001199779	PSMB2	-0.0292056	0.897095	1
NM_002794	PSMB2	0.0823608	0.33966	1
NM_001190481	CLSPN	0.0872658	0.601413	1
NM_001348691	C1orf216	0.0188804	0.844296	1
NM_152374	C1orf216	0.0955119	0.505183	1
NM_012199	AGO1	0.104259	0.601413	1
NM_001317123	AGO1	0.179688	0.22798	1
NM_017825	ADPRS	0.00937428	0.655865	1
NM_014466	TEKT2	-0.263374	0.0664474	1
NM_001286366	MAP7D1	-0.350748	0.102678	1
NM_001270896	TRAPPC3	-0.235277	0.0946022	1
NM_001270895	TRAPPC3	-0.224652	0.428786	1
NM_018166	EVA1B	0.540613	0.00342744	0.0333611
NM_024676	SH3D21	0.128818	0.574966	1
NM_001304762	EVA1B	0.636491	0.00441226	0.0351524
NM_001162530	SH3D21	0.0646381	0.655865	1
NM_032881	LSM10	-0.108656	0.56195	1
NM_145047	OSCP1	-0.0257965	0.690865	1
NM_031280	MRPS15	-0.0810709	0.777447	1
NM_156039	CSF3R	0.0884941	0.889519	1
NM_001323550	ZC3H12A	-0.2129	0.259175	1
NM_001270876	MEAF6	0.0262691	0.51134	1
NM_001323623	GNL2	-0.153115	0.297622	1
NM_003462	DNALI1	-0.000417083	0.635212	1
NM_001242908	RSPO1	0.283848	0.111135	1
NM_173641	EPHA10	-0.169837	0.330008	1
NM_001350765	C1orf109	-0.0010714	0.746877	1
NM_017850	C1orf109	-0.00316935	0.851802	1
NM_001256875	CDCA8	-0.0199201	0.696387	1
NM_001113482	MANEAL	-0.0636859	0.581526	1
NM_152496	MANEAL	-0.125742	0.216993	1
NM_198446	C1orf122	-0.086725	0.614837	1
NM_005955	MTF1	0.0534855	0.844296	1
NM_001297434	INPP5B	0.0220203	0.799575	1
NM_001320830	SF3A3	-0.0383238	0.873689	1
NM_002699	POU3F1	0.268819	0.34753	1
NM_004468	FHL3	-0.168945	0.127231	1
NM_016037	UTP11	-0.241571	0.117827	1
NM_017821	RHBDL2	-0.139904	0.395898	1
NM_012333	MYCBP	-0.381013	0.00585583	1
NM_001304746	RHBDL2	-0.134612	0.46907	1
NM_030772	GJA9	0.562393	0.0890296	0.140966
NM_024595	AKIRIN1	-0.195257	0.437985	1
NM_004552	NDUFS5	0.30955	0.0251535	1
NM_015038	KIAA0754	0.255506	0.269956	1
NM_003819	PABPC4	-0.035492	0.293174	1
NM_014571	HEYL	0.270887	0.19616	1
NM_001195007	PPIE	0.183128	0.176816	1
NM_001282397	HPCAL4	0.132866	0.614837	1
NM_016257	HPCAL4	0.020941	0.829327	1
NM_022120	OXCT2	0.101395	0.697947	1
NM_032526	NT5C1A	-0.0863345	0.56844	1
NM_005376	MYCL	0.279996	0.0339329	1
NM_001312691	TRIT1	-0.035149	0.881953	1
NM_001136493	MFSD2A	-0.16254	0.390567	1
NM_001350482	CAP1	0.146926	0.553497	1
NM_001350479	CAP1	-0.0596866	0.719347	1
NM_001350481	CAP1	0.165172	0.352506	1
NM_001142604	PPT1	-0.115792	0.628389	1
NM_005857	ZMPSTE24	0.160513	0.1618	1
NM_001008740	TMCO2	0.0759376	0.56195	1
NM_001852	COL9A2	0.256494	0.284409	1
NM_001198980	SMAP2	-0.036587	0.90468	1
NM_001198978	SMAP2	-0.240739	0.19616	1
NM_022733	SMAP2	-0.214665	0.142405	1
NM_001198979	SMAP2	-0.00285328	0.889519	1
NM_001320179	ZFP69	0.399447	0.00791353	1
NM_022774	EXO5	-0.0357264	0.851802	1
NM_023070	ZFP69B	-0.0505575	0.621597	1
NM_152373	ZNF684	-0.115003	0.669781	1
NM_014747	RIMS3	-0.342621	0.0555052	1
NM_001308115	NFYC	0.318231	0.0136405	1
NM_014223	NFYC	0.221304	0.378003	1
NM_001308114	NFYC	0.068743	0.334812	1
NM_001142590	NFYC	0.103835	0.527997	1
NM_133467	CITED4	-0.399482	0.139785	1
NM_144990	SLFNL1	0.00605859	0.919876	1
NM_001301237	CTPS1	0.022169	0.46907	1
NM_001905	CTPS1	0.0720185	0.662808	1
NM_001291281	FOXO6	-0.555999	0.0232904	0.066898
NM_001302269	EDN2	0.103185	0.199528	1
NM_033553	GUCA2A	0.138656	0.179939	1
NM_007102	GUCA2B	-0.153187	0.115563	1
NM_001287508	PPCS	0.233014	0.0593547	1
NM_001287507	PPCS	0.119814	0.288769	1
NM_001146192	ZMYND12	0.068775	0.417652	1
NM_001080850	CCDC30	0.0556894	0.655865	1
NM_006347	PPIH	0.00768233	0.927485	1
NM_022356	P3H1	0.221786	0.56844	1
NM_024097	C1orf50	0.236589	0.383245	1
NM_001185117	CLDN19	0.0688695	0.784804	1
NM_004559	YBX1	-0.253469	0.466973	1
NM_018538	ERMAP	0.0393694	0.549076	1
NM_015911	ZNF691	-0.0405317	0.710688	1
NM_199342	SVBP	-0.227404	0.117437	1
NM_001017922	ERMAP	-0.167455	0.293174	1
NM_006516	SLC2A1	-0.0994144	0.957979	1
NM_001159936	EBNA1BP2	0.0588044	0.965614	1
NM_001101376	FAM183A	0.0700304	0.719347	1
NM_006824	EBNA1BP2	-0.00928169	0.851802	1
NM_144626	TMEM125	-0.0437409	1	1
NM_182517	C1orf210	-0.155688	0.132144	1
NM_001164829	C1orf210	-0.149415	0.147757	1
NM_052877	MED8	0.259815	0.216993	1
NM_022821	ELOVL1	0.229517	0.362574	1
NM_005373	MPL	0.236535	0.00943471	1
NM_001255	CDC20	0.120719	0.275821	1
NM_001256399	ELOVL1	0.179414	0.586197	1
NM_031207	HYI	-0.211035	0.1618	1
NM_014663	KDM4A	0.0465657	0.714279	1
NM_001136215	ARTN	0.176927	0.434416	1
NM_201649	SLC6A9	0.0492509	0.965614	1
NM_001319171	DPH2	-0.0236422	0.889519	1
NM_001349127	CCDC24	0.0847105	0.835897	1
NM_030587	B4GALT2	-0.42739	0.00641636	1
NM_004047	ATP6V0B	0.0347324	0.51134	1
NM_003780	B4GALT2	-0.246852	0.275821	1
NM_001328630	SLC6A9	0.23387	0.167688	1
NM_001328629	SLC6A9	0.349921	0.166798	1
NM_001349128	CCDC24	0.114547	0.717877	1
NM_001005417	B4GALT2	-0.307379	0.0803142	1
NM_173484	KLF17	-0.0280225	0.90468	1
NM_001034024	DMAP1	0.108674	0.669781	1
NM_001358438	KLF18	-0.0805045	0.669781	1
NM_001300747	TMEM53	-0.0754669	0.581526	1
NM_001145636	ARMH1	-0.0550518	0.712189	1
NM_001166292	PTCH2	0.00827078	0.59475	1
NM_004073	PLK3	0.243009	0.134086	1
NM_001136537	BTBD19	0.135813	0.380035	1
NM_153274	BEST4	0.107118	0.209881	1
NM_001013632	DYNLT4	-0.0640788	0.542693	1
NM_001012	RPS8	0.0959652	0.829327	1
NM_024602	HECTD3	-0.362958	0.115563	1
NM_000374	UROD	-0.391221	0.0112079	1
NM_001128425	MUTYH	0.0605448	0.814418	1
NM_001293195	MUTYH	0.202717	0.186305	1
NM_001293196	MUTYH	0.151784	0.505183	1
NM_001048172	MUTYH	0.155009	0.486948	1
NM_032756	HPDL	0.108647	0.220613	1
NM_025077	TOE1	0.106213	0.626579	1
NM_001202431	PRDX1	0.132859	0.302116	1
NM_001330540	MMACHC	-0.364335	0.0188904	1
NM_002574	PRDX1	0.105978	0.621597	1
NM_001102601	CCDC163	-0.333743	0.043108	1
NM_001195193	NASP	-0.284151	0.0662553	1
NM_153326	AKR1A1	-0.0370791	0.980893	1
NM_001114938	CCDC17	-0.00583502	0.844296	1
NM_016486	TMEM69	0.130009	0.320533	1
NM_001145349	IPP	-0.0747024	0.897095	1
NM_005727	TSPAN1	-0.0264712	0.90468	1
NM_001142548	RAD54L	-0.0482748	0.648951	1
NM_006369	LRRC41	-0.304229	0.24323	1
NM_001297565	UQCRH	-0.352729	0.401272	1
NM_001013615	LURAP1	-0.128677	0.690865	1
NM_001256128	NSUN4	-0.00663983	0.696387	1
NM_199044	NSUN4	0.0809433	0.29809	1
NM_001441	FAAH	0.111625	0.608108	1
NM_001357063	TMEM275	0.0491763	0.705055	1
NM_147192	DMBX1	0.14887	0.173734	1
NM_001322255	KNCN	0.05383	0.56195	1
NM_001097611	KNCN	-0.00875517	0.601413	1
NM_014774	EFCAB14	0.0595223	0.606237	1
NM_001145474	TEX38	0.029857	0.912274	1
NM_145279	MOB3C	-0.0413742	0.973252	1
NM_001243728	ATPAF1	0.0546922	0.662808	1
NM_022745	ATPAF1	-0.126501	0.445801	1
NM_201403	MOB3C	0.0603181	0.739592	1
NM_001319163	CYP4B1	0.00778889	0.814418	1
NM_000778	CYP4A11	-0.0158404	0.9351	1
NM_001320290	CYP4X1	0.221342	0.0722343	1
NM_178033	CYP4X1	0.423663	4.86915e-05	1
NM_001308102	CYP4A22	-0.101423	0.965614	1
NM_001290406	TAL1	-0.10748	0.912274	1
NM_001290405	TAL1	-0.187538	0.428786	1
NM_005764	PDZK1IP1	-0.0310106	0.996178	1
NM_001287347	TAL1	-0.186166	0.474989	1
NM_001282937	STIL	-0.311155	0.0872876	1
NM_012186	FOXE3	-0.278912	0.354471	1
NM_004474	FOXD2	-0.0719753	0.957979	1
NM_001135181	SLC5A9	-0.0203932	0.549076	1
NM_001349795	BEND5	0.0898851	0.478856	1
NM_032110	DMRTA2	-0.0365989	0.648951	1
NM_078626	CDKN2C	0.0881003	0.697947	1
NM_001262	CDKN2C	0.334889	0.137202	1
NM_001136508	C1orf185	-0.0528867	0.117827	1
NM_001297666	TTC39A	-0.0316627	0.284409	1
NM_014372	RNF11	-0.256904	0.156068	1
NM_001159969	EPS15	0.109669	0.359496	1
NM_001350210	OSBPL9	-0.121489	0.957979	1
NM_138417	KTI12	0.0852048	0.359496	1
NM_015913	TXNDC12	0.0155479	0.843429	1
NM_001243767	BTF3L4	0.023295	0.813395	1
NM_004153	ORC1	0.131662	0.142405	1
NM_032864	PRPF38A	0.131891	0.167688	1
NM_015696	GPX7	0.218708	0.461093	1
NM_023077	COA7	-0.134224	0.195025	1
NM_001042693	SHISAL2A	0.0478049	0.499065	1
NM_001198961	ECHDC2	-0.28962	0.115563	1
NM_001319958	ECHDC2	-0.315132	0.0677109	1
NM_006671	SLC1A7	0.0654933	0.401272	1
NM_001199081	PODN	0.0135015	0.897095	1
NM_001007250	SCP2	-0.0116807	0.980893	1
NM_017887	CZIB	-0.143402	0.390567	1
NM_001330589	CPT2	0.0462832	0.608108	1
NM_002370	MAGOH	0.0009235	0.740967	1
NM_033067	DMRTB1	-0.00958296	0.889519	1
NM_001039716	DIO1	0.034542	0.784804	1
NM_018982	YIPF1	-0.0186199	0.762792	1
NM_004872	TMEM59	-0.140517	0.581526	1
NM_052940	LRRC42	0.045918	0.765079	1
NM_001305049	TMEM59	-0.108218	0.542693	1
NM_001276395	LDLRAD1	0.105189	0.224275	1
NM_201546	CDCP2	-0.0890268	0.406689	1
NM_016491	MRPL37	-0.25021	0.792181	1
NM_001291332	MROH7	-0.0302899	0.851802	1
NM_176782	FAM151A	0.00541195	0.406689	1
NM_017904	TTC22	0.166394	0.911777	1
NM_001291333	TTC4	-0.113685	0.705055	1
NM_152607	LEXM	-0.0183212	0.719347	1
NM_152268	PARS2	-0.0693043	0.799575	1
NM_014762	DHCR24	-0.0865448	0.344553	1
NM_174936	PCSK9	0.0587578	0.9351	1
NM_057176	BSND	0.161811	0.117827	1
NM_182532	TMEM61	-0.0455505	0.90468	1
NM_000562	C8A	-0.00715727	0.697947	1
NM_002353	TACSTD2	0.215676	0.127231	1
NM_001085487	MYSM1	0.125747	0.202937	1
NM_002228	JUN	-0.148499	0.517535	1
NM_000775	CYP2J2	-0.0249477	0.499065	1
NM_152377	C1orf87	0.0815761	0.325248	1
NM_032027	TM2D1	0.0986442	0.805928	1
NM_019079	L1TD1	0.24951	0.0837428	1
NM_014495	ANGPTL3	0.0686805	0.919876	1
NM_012183	FOXD3	0.677901	0.0738968	0.12317
NM_013339	ALG6	-0.0069042	0.888896	1
NM_032437	EFCAB7	-0.10247	0.369678	1
NM_152489	UBE2U	-0.285824	0.15326	1
NM_001198681	LEPROT	0.254102	0.318676	1
NM_001198683	LEPROT	0.351968	0.102455	1
NM_001037339	PDE4B	0.00691457	0.957979	1
NM_001297442	PDE4B	0.0266587	0.965614	1
NM_005478	INSL5	-0.0578869	0.390567	1
NM_001146111	MIER1	-0.0428229	0.712189	1
NM_001077704	MIER1	0.129062	0.897095	1
NM_001276352	C1orf141	-0.129202	0.996178	1
NM_001319233	IL12RB2	-0.425339	0.00254953	1
NM_001199742	GADD45A	0.312701	0.521717	1
NM_004675	DIRAS3	-0.0049746	0.505183	1
NM_000329	RPE65	-0.112455	0.354471	1
NM_001350615	SRSF11	0.0566493	0.792181	1
NM_004768	SRSF11	0.0126821	0.740967	1
NM_001190463	CTH	-0.123158	0.380035	1
NM_001036646	HHLA3	0.148578	0.235519	1
NM_005455	ZRANB2	-0.0179758	0.980893	1
NM_001134759	CRYZ	0.105412	0.374835	1
NM_138467	TYW3	0.0715966	0.530039	1
NM_001162916	TYW3	0.0812257	0.46907	1
NM_001256114	LHX8	0.0313787	0.874398	1
NM_001001933	LHX8	-0.0338511	0.59475	1
NM_004582	RABGGTB	-0.0628699	0.505183	1
NM_001127328	ACADM	-0.0795975	0.662808	1
NM_080868	ASB17	0.0680249	0.517535	1
NM_201626	USP33	-0.132273	0.440088	1
NM_003902	FUBP1	-0.142679	0.499065	1
NM_001317103	DNAJB4	-0.276071	0.108678	1
NM_001317102	DNAJB4	-0.161033	0.486948	1
NM_001317099	DNAJB4	0.251085	0.770109	1
NM_001039585	PTGFR	0.0219292	0.51134	1
NM_006820	IFI44L	-0.0452989	0.588121	1
NM_006417	IFI44	0.357532	0.0648253	1
NM_058248	DNASE2B	0.00816704	0.334812	1
NM_021233	DNASE2B	0.0431189	0.799575	1
NM_004388	CTBS	-0.125554	0.719347	1
NM_025065	RPF1	-0.0589293	0.492987	1
NM_005274	GNG5	-0.102295	0.792181	1
NM_001310156	SPATA1	-0.0323022	0.770109	1
NM_001166294	SSX2IP	-0.0359925	0.330008	1
NM_001166295	SSX2IP	0.00523075	0.536348	1
NM_018298	MCOLN3	0.0239443	0.836804	1
NM_032184	SYDE2	-0.222282	0.412149	1
NM_001320715	BCL10	0.21984	0.175844	1
NM_001554	CCN1	0.22423	0.0786427	1
NM_001170670	ZNHIT6	0.200743	0.209881	1
NM_020729	ODF2L	0.0277913	0.950348	1
NM_001285	CLCA1	-0.068825	0.536348	1
NM_001206652	SH3GLB1	0.124583	0.581526	1
NM_004261	SELENOF	-0.149925	0.304851	1
NM_006769	LMO4	0.176679	0.210388	1
NM_001514	GTF2B	-0.13287	0.247151	1
NM_019610	RBMXL1	-0.187694	0.206388	1
NM_001319181	GBP3	0.18334	0.640295	1
NM_001349450	KYAT3	-0.258626	0.0947356	1
NM_207398	GBP7	0.262197	0.0347692	1
NM_004120	GBP2	0.0225486	0.965614	1
NM_052942	GBP5	-0.0540773	0.655865	1
NM_001320257	GBP6	0.0661509	0.676781	1
NM_001320185	ZNF326	0.116519	0.315862	1
NM_020063	BARHL2	-0.236557	0.499065	1
NM_201269	ZNF644	-0.265822	0.0620407	1
NM_016620	ZNF644	-0.2716	0.0174363	1
NM_003503	CDC7	-0.135082	0.829327	1
NM_001134420	CDC7	-0.0959078	0.705055	1
NM_001242810	BRDT	0.111737	0.359496	1
NM_173567	EPHX4	0.115295	0.980893	1
NM_001726	BRDT	-0.147527	0.635212	1
NM_015237	BTBD8	0.136156	0.374835	1
NM_183242	BTBD8	-0.0366364	0.755495	1
NM_001287737	SETSIP	0.0425188	0.517535	1
NM_001319683	GLMN	0.160788	0.881288	1
NM_001012425	C1orf146	-0.0129843	0.770109	1
NM_005263	GFI1	0.252357	0.0545925	1
NM_001127216	GFI1	0.2519	0.0965187	1
NM_001127215	GFI1	-0.109296	0.33966	1
NM_000969	RPL5	0.264626	0.0648253	1
NM_016040	TMED5	0.17986	0.437993	1
NM_001938	DR1	-0.00812901	0.586197	1
NM_001308251	BCAR3	-0.135912	0.374835	1
NM_001261410	BCAR3	-0.0792258	0.434416	1
NM_014597	DNTTIP2	0.0236398	0.942395	1
NM_001328664	ARHGAP29	0.106515	0.957979	1
NM_001328666	ARHGAP29	0.387679	0.942722	1
NM_001178096	F3	0.212868	0.530039	1
NM_001350223	SLC44A3	0.0239903	0.965614	1
NM_001839	CNN3	0.0944757	0.821864	1
NM_001286056	CNN3	-0.131809	0.814418	1
NM_144988	ALG14	0.0823552	0.304851	1
NM_152487	TLCD4	-0.263414	0.334812	1
NM_001199679	TLCD4	-0.0953868	0.919876	1
NM_001278248	RWDD3	-0.109678	0.792181	1
NM_001037317	PLPPR5	-0.219111	0.0966741	1
NM_001013660	FRRS1	0.165469	0.213416	1
NM_000646	AGL	0.0103034	0.676781	1
NM_000644	AGL	-0.144568	0.499065	1
NM_000642	AGL	-0.160772	0.628389	1
NM_012243	SLC35A3	0.0495211	0.897095	1
NM_001271685	SLC35A3	0.0226745	0.874398	1
NM_001256387	LRRC39	0.0195229	0.683809	1
NM_019083	TRMT13	-0.122625	0.34949	1
NM_194292	SASS6	-0.0599675	0.555495	1
NM_003729	RTCA	0.21952	0.136607	1
NM_022049	GPR88	-0.192611	0.0855005	1
NM_001439	EXTL2	0.369663	0.00890124	1
NM_001144884	SLC30A7	0.186133	0.158106	1
NM_133496	SLC30A7	0.186133	0.158106	1
NM_015958	DPH5	0.106166	0.302116	1
NM_001400	S1PR1	-0.135897	0.311235	1
NM_001288821	OLFM3	0.226217	0.59475	1
NM_001286997	RNPC3-DT	-0.0241864	0.980783	1
NM_020978	AMY2B	-0.0704932	0.271593	1
NM_000699	AMY2A	-0.0858215	0.284409	1
NM_001346780	AMY1C	0.132861	0.224275	1
NM_001346780	AMY1C	0.105856	0.183102	1
NM_004038	AMY1A	0.0936923	0.445801	1
NM_004038	AMY1A	0.0776873	0.235519	1
NM_001008219	AMY1C	0.107855	0.34949	1
NM_001008219	AMY1C	0.0886664	0.186305	1
NM_001008218	AMY1B	0.0939559	0.440088	1
NM_001008218	AMY1B	0.0697182	0.306653	1
NM_001008221	AMY1A	0.133067	0.22798	1
NM_001008221	AMY1A	0.107448	0.170691	1
NM_018137	PRMT6	-0.260297	0.0473178	1
NM_213651	SLC25A24	0.292806	0.11508	1
NM_001143989	NBPF4	0.0753343	0.434416	1
NM_013386	SLC25A24	0.09271	0.814418	1
NM_001143988	NBPF6	0.187352	0.74822	1
NM_001010883	FAM102B	0.219314	0.205173	1
NM_001349757	PRPF38B	0.125448	0.642066	1
NM_144584	HENMT1	-0.0280904	0.536348	1
NM_001144937	FNDC7	0.0382523	0.881953	1
NM_001102592	HENMT1	0.0547861	0.792181	1
NM_152763	AKNAD1	-0.0239105	0.690865	1
NM_001048210	CLCC1	0.10165	0.364565	1
NM_001278203	CLCC1	-0.049755	0.889519	1
NM_001122961	CFAP276	-0.00632374	0.912274	1
NM_020141	TMEM167B	-0.00330369	0.942722	1
NM_005645	TAF13	0.140499	0.115563	1
NM_001322248	TMEM167B	0.0274073	0.90468	1
NM_001330669	SARS1	-0.0274232	0.851802	1
NM_032636	PSRC1	-0.0896058	0.628389	1
NM_001284353	ELAPOR1	-0.0267231	0.755495	1
NM_001408	CELSR2	-0.152212	0.492987	1
NM_001350237	PSRC1	-0.096009	0.614837	1
NM_001205228	SORT1	0.297447	0.46907	1
NM_001199773	PSMA5	0.00326048	0.881953	1
NM_002790	PSMA5	0.0521191	0.621597	1
NM_002959	SORT1	0.109018	0.100645	1
NM_001199774	PSMA5	0.0327385	0.791047	1
NM_031936	GPR61	0.0702319	0.46907	1
NM_001350177	ATXN7L2	-0.270578	0.235519	1
NM_182580	CYB561D1	0.179203	0.334812	1
NM_020703	AMIGO1	-0.265239	0.192834	1
NM_001134402	CYB561D1	0.130983	0.517535	1
NM_001040709	SYPL2	-0.104809	0.814418	1
NM_001308170	AMPD2	-0.0685726	0.957979	1
NM_004037	AMPD2	-0.155643	0.288769	1
NM_001142368	GSTM2	-0.195227	0.170691	1
NM_203404	AMPD2	0.0345938	0.9351	1
NM_001257360	AMPD2	-0.263507	0.231728	1
NM_001257361	AMPD2	0.1161	0.1618	1
NM_005272	GNAT2	-0.117564	0.117827	1
NM_147148	GSTM4	-0.107207	0.784804	1
NM_001319952	EPS8L3	0.00967728	0.642066	1
NM_000851	GSTM5	-0.1961	0.255123	1
NM_000849	GSTM3	-0.186313	0.359496	1
NM_172212	CSF1	-0.11275	0.480948	1
NM_001242674	AHCYL1	0.0555038	0.523768	1
NM_006492	ALX3	0.164843	0.608108	1
NM_001270768	STRIP1	-0.0430548	0.784804	1
NM_033088	STRIP1	0.0214195	0.549076	1
NM_001242673	AHCYL1	-0.0361366	0.851802	1
NM_001242676	AHCYL1	-0.102951	0.183102	1
NM_203412	UBL4B	0.0187248	0.51134	1
NM_001010898	SLC6A17	0.00311678	0.942722	1
NM_032414	PROK1	0.115909	0.536348	1
NM_004696	SLC16A4	-0.00221561	0.792181	1
NM_006402	LAMTOR5	-0.126127	0.412149	1
NM_004974	KCNA2	-0.349908	0.0855005	1
NM_005549	KCNA10	-0.0324153	0.581526	1
NM_002232	KCNA3	0.236463	0.56195	1
NM_001040033	CD53	-0.0616736	0.889519	1
NM_018372	LRIF1	-0.0447877	0.814418	1
NM_001320638	CD53	0.131086	0.311235	1
NM_024901	DENND2D	0.0483685	0.733737	1
NM_001271833	DENND2D	-0.119392	0.813395	1
NM_004000	CHI3L2	-0.138813	0.434416	1
NM_006090	CEPT1	0.295803	0.23033	1
NM_001330743	CEPT1	0.158141	0.492987	1
NM_001007794	CEPT1	0.207671	0.100645	1
NM_001025199	CHI3L2	0.221905	0.04413	1
NM_201653	CHIA	-0.1406	0.463191	1
NM_001300831	PIFO	0.0110578	0.302116	1
NM_174896	C1orf162	0.0162296	0.777447	1
NM_024102	WDR77	-0.116447	0.588121	1
NM_002557	OVGP1	0.218168	0.486948	1
NM_001302679	ADORA3	0.112291	0.374835	1
NM_001688	ATP5PB	-0.114219	0.574966	1
NM_019099	INKA2	-0.0463201	0.41282	1
NM_198926	INKA2	0.043408	0.74822	1
NM_007204	DDX20	0.0967987	0.406689	1
NM_004185	WNT2B	-0.00956792	0.740967	1
NM_024494	WNT2B	0.192806	1	1
NM_020963	MOV10	-0.378925	0.0707001	1
NM_001321324	MOV10	-0.479122	0.043108	1
NM_001130079	MOV10	-0.483829	0.0677109	1
NM_006135	CAPZA1	-0.0591178	0.527997	1
NM_005167	PPM1J	-0.102757	0.874398	1
NM_182759	TAFA3	0.00954161	0.912274	1
NM_003051	SLC16A1	-0.273116	0.127231	1
NM_001166496	SLC16A1	-0.215579	0.22798	1
NM_001193431	PTPN22	-0.0542509	0.434416	1
NM_018364	RSBN1	0.0229132	0.996178	1
NM_181358	HIPK1	-0.218772	0.0837428	1
NM_001253853	AP4B1	0.0478235	0.762792	1
NM_001253852	AP4B1	0.00523928	0.90468	1
NM_001319947	DCLRE1B	-0.0163931	0.851802	1
NM_001319946	DCLRE1B	-0.00588928	0.957979	1
NM_001286352	OLFML3	-0.149511	0.19616	1
NM_198269	HIPK1	0.192129	0.380035	1
NM_198268	HIPK1	-0.193177	0.628389	1
NM_005872	BCAS2	-0.444078	0.0518637	1
NM_002524	NRAS	0.114302	0.474989	1
NM_001242893	CSDE1	0.0511734	0.733737	1
NM_001172626	AMPD1	0.0736331	0.51134	1
NM_001102396	SIKE1	0.215271	0.0677109	1
NM_001277991	TSHB	0.15834	0.104743	1
NM_000549	TSHB	-0.109747	0.530039	1
NM_001172411	VANGL1	-0.339064	0.46907	1
NM_001172412	VANGL1	-0.100023	0.836804	1
NM_005599	NHLH2	0.0900523	0.412149	1
NM_001111061	NHLH2	0.00608758	0.792181	1
NM_152367	MAB21L3	0.195657	0.0620407	1
NM_001160234	ATP1A1	-0.137639	0.297622	1
NM_001160233	ATP1A1	0.00394698	0.904135	1
NM_001144822	CD58	-0.150222	0.417652	1
NM_020440	PTGFRN	-0.142186	0.401272	1
NM_025188	TRIM45	0.0741938	0.851802	1
NM_003594	TTF2	-0.0937807	0.719347	1
NM_017709	TENT5C	0.268848	0.235519	1
NM_017686	GDAP2	-0.0507063	0.90414	1
NM_152380	TBX15	-0.205622	0.235519	1
NM_001330677	TBX15	0.0577984	0.34949	1
NM_001166120	HSD3B2	-0.12154	0.297622	1
NM_001328615	HSD3B1	0.184836	0.173734	1
NM_000198	HSD3B2	-0.0387467	0.792181	1
NM_001080470	ZNF697	-0.132395	0.56844	1
NM_006623	PHGDH	-0.0379478	0.851802	1
NM_001166107	HMGCS2	0.00846377	0.608108	1
NM_001047980	NBPF7P	-0.0789135	0.881953	1
NM_001159352	REG4	-0.122997	0.354471	1
NM_021794	ADAM30	0.0242393	0.821864	1
NM_001244910	FCGR1B	-0.0100061	0.662808	1
NM_001123068	PPIAL4G	0.0132804	0.792181	1
NM_001287385	FAM72C	-0.142338	0.34949	1
NM_001346067	FAM72C	-0.0608322	0.881953	1
NM_001345942	FAM72D	-0.0662274	0.836804	1
NM_207418	FAM72D	-0.154501	0.26327	1
NM_001135789	PPIAL4C	-0.0155781	0.683809	1
NM_001350520	PDE4DIP	-0.103261	0.423198	1
NM_001002811	PDE4DIP	-0.0371295	0.770109	1
NM_001330685	POLR3GL	-0.115313	0.183102	1
NM_213652	HJV	-0.0700207	0.90468	1
NM_006472	TXNIP	-0.00156608	0.988535	1
NM_001313972	TXNIP	-0.0768123	0.428786	1
NM_001039888	ANKRD34A	-0.101326	0.24323	1
NM_001303456	POLR3C	0.171789	0.466973	1
NM_144698	ANKRD35	-0.238388	0.0292643	1
NM_005105	RBM8A	-0.0129562	0.799575	1
NM_006468	POLR3C	0.140232	0.332905	1
NM_001303041	ITGA10	-0.402394	0.344553	1
NM_003846	PEX11B	0.0533318	0.173734	1
NM_001184795	PEX11B	0.00406258	0.621597	1
NM_006099	PIAS3	-0.16856	0.19616	1
NM_001012758	NUDT17	-0.145243	0.683809	1
NM_007053	CD160	-0.00540505	0.912274	1
NM_001097613	GPR89A	0.273545	0.0300022	1
NM_001101663	NBPF11	-0.103576	0.919876	1
NM_183372	NBPF11	-0.292469	0.0693513	1
NM_005399	PRKAB2	0.271117	0.347538	1
NM_001256336	CHD1L	0.0403501	0.549076	1
NM_001348452	CHD1L	0.0338096	0.428786	1
NM_001323625	ACP6	-0.200729	0.288769	1
NM_016361	ACP6	-0.154093	0.428786	1
NM_005266	GJA5	0.184327	0.275821	1
NM_181703	GJA5	-0.0848435	0.555495	1
NM_005267	GJA8	0.133192	0.176816	1
NM_001135789	PPIAL4C	-0.127172	0.251115	1
NM_001164262	PPIAL4F	-0.0201962	0.719347	1
NM_015383	NBPF14	0.118132	0.22798	1
NM_001277444	NBPF9	0.11992	0.206388	1
NM_173638	NBPF15	-0.0427059	0.965614	1
NM_001170755	NBPF15	0.047859	0.712189	1
NM_001164262	PPIAL4F	0.057939	0.635212	1
NM_001355409	H3-2	0.170344	0.145063	1
NM_003516	H2AC18	0.20623	0.383192	1
NM_021059	H3C14	0.20794	0.530039	1
NM_001161334	H2BC18	-0.341163	0.0373829	1
NM_003548	H4C14	-0.0697847	0.740967	1
NM_001123375	H3C13	-0.0966138	0.642066	1
NM_000566	FCGR1A	-0.0749855	0.705055	1
NM_003517	H2AC20	0.333912	0.0466293	1
NM_003516	H2AC18	-0.0643349	0.911777	1
NM_001328674	SV2A	-0.0945112	0.480948	1
NM_001278719	SV2A	0.15195	0.102678	1
NM_001034077	H4C15	0.240412	0.132144	1
NM_181873	MTMR11	0.0262718	0.777447	1
NM_175065	H2AC21	-0.0321344	0.950065	1
NM_016074	BOLA1	0.0888194	0.608108	1
NM_005850	SF3B4	-0.204555	0.142405	1
NM_003528	H2BC21	0.349297	0.0269954	1
NM_021059	H3C14	-0.165954	0.814418	1
NM_001145862	MTMR11	-0.0460773	0.59475	1
NM_001280559	ANP32E	-0.0455355	0.574966	1
NM_001136479	ANP32E	0.111516	0.26741	1
NM_001304724	PLEKHO1	-0.303473	0.889519	1
NM_001304723	PLEKHO1	-0.0374921	0.692829	1
NM_016274	PLEKHO1	-0.271296	0.428786	1
NM_001350529	PRPF3	-0.0492426	0.957739	1
NM_012113	CA14	0.0528071	0.799575	1
NM_024579	C1orf54	-0.186177	0.220613	1
NM_144697	CIART	0.315874	0.0179099	1
NM_031901	MRPS21	-0.260367	0.048422	1
NM_001243772	APH1A	-0.0346098	0.608108	1
NM_001301042	C1orf54	-0.175059	0.26741	1
NM_001301040	C1orf54	-0.236385	0.176816	1
NM_001300841	CIART	0.274319	0.0232904	1
NM_182763	MCL1	-0.709128	0.00702406	0.0418345
NM_207047	ENSA	0.135785	0.410076	1
NM_019032	ADAMTSL4	0.270627	0.46907	1
NM_004425	ECM1	-0.0120175	0.683809	1
NM_032132	HORMAD1	0.0959662	0.330008	1
NM_018178	GOLPH3L	-0.0779693	0.792181	1
NM_001197325	ARNT	-0.130807	0.278412	1
NM_000396	CTSK	-0.103759	0.46907	1
NM_003568	ANXA9	-0.117191	0.683809	1
NM_001243491	SETDB1	-0.0646652	0.82088	1
NM_022075	CERS2	0.0780246	0.897095	1
NM_001319998	MINDY1	-0.119066	0.897095	1
NM_018379	MINDY1	-0.0959491	0.859322	1
NM_001163259	MINDY1	0.0333879	0.499065	1
NM_001040217	MINDY1	0.0528662	0.423198	1
NM_001323913	GABPB2	0.0952263	0.335316	1
NM_017860	C1orf56	-0.0990676	0.51134	1
NM_144618	GABPB2	0.107089	0.289232	1
NM_001178062	SEMA6C	-0.388147	0.00486387	1
NM_006818	MLLT11	-0.111858	0.474989	1
NM_001159642	BNIPL	2.26561e-05	1	1
NM_020239	CDC42SE1	-0.112725	0.486948	1
NM_013353	TMOD4	0.119862	0.251115	1
NM_001330689	PIP5K1A	-0.0410866	0.696387	1
NM_001204848	TNFAIP8L2-SCNM1	-0.031642	0.614837	1
NM_001271088	VPS72	0.0256868	0.733737	1
NM_212551	LYSMD1	0.0124183	0.777447	1
NM_001204856	SCNM1	0.0087997	0.683809	1
NM_001330692	PSMD4	0.0763274	0.996156	1
NM_002810	PSMD4	0.0267428	0.739592	1
NM_001136543	LYSMD1	0.014937	0.705055	1
NM_001258289	SELENBP1	0.0726585	0.633424	1
NM_001330721	PI4KB	-0.0752136	0.601413	1
NM_002796	PSMB4	0.0185955	0.988469	1
NM_001025603	RFX5	0.0496499	0.74822	1
NM_020770	CGN	-0.00148312	0.770109	1
NM_001004432	LINGO4	-0.0363804	0.996178	1
NM_001144956	RIIAD1	0.0415222	0.542693	1
NM_001291106	CELF3	0.10076	0.284409	1
NM_001134939	OAZ3	-0.0312939	0.280093	1
NM_016178	OAZ3	-0.00982933	0.777447	1
NM_001172648	CELF3	0.0283655	0.829327	1
NM_001301371	OAZ3	-0.101468	0.302116	1
NM_031420	MRPL9	-0.127613	0.705055	1
NM_001083965	TDRKH	-0.145629	0.690865	1
NM_053055	THEM4	-0.0961301	0.434416	1
NM_182578	THEM5	-0.0802742	0.601413	1
NM_001136003	C2CD4D	0.301171	0.0055068	1
NM_005620	S100A11	-0.0397681	0.988469	1
NM_002966	S100A10	0.0897078	0.705055	1
NM_001310142	LOC100131107	0.162362	0.0677109	1
NM_001122965	RPTN	0.0209287	0.46907	1
NM_007113	TCHH	0.147422	0.0803142	1
NM_001008536	TCHHL1	-0.142605	0.235519	1
NM_002016	FLG	0.0346147	0.942722	1
NM_001009931	HRNR	-0.0998106	0.302116	1
NM_016190	CRNN	-0.0968106	0.56195	1
NM_001014342	FLG2	-0.110704	0.423198	1
NM_019060	CRCT1	-0.124268	0.499065	1
NM_032563	LCE3D	0.0855911	0.189549	1
NM_178435	LCE3E	-0.0297829	0.592843	1
NM_178438	LCE5A	0.0617237	0.239353	1
NM_001024679	C1orf68	0.0683558	0.851802	1
NM_014357	LCE2B	0.0151435	0.874398	1
NM_178356	LCE4A	0.141404	0.957979	1
NM_178429	LCE2C	0.00306913	0.874398	1
NM_178428	LCE2A	-0.00810646	0.542693	1
NM_178430	LCE2D	0.0257535	0.866854	1
NM_178431	LCE3A	-0.0906784	0.457353	1
NM_178434	LCE3C	-0.0831249	0.988445	1
NM_178433	LCE3B	-0.418269	0.221409	1
NM_001276331	LCE1C	-0.082265	0.401272	1
NM_001025231	KPRP	0.292003	0.311235	1
NM_001128600	LCE6A	0.0696585	0.486948	1
NM_178349	LCE1B	0.0633097	0.517535	1
NM_178348	LCE1A	0.230676	0.0323113	1
NM_178354	LCE1F	0.0930516	0.26327	1
NM_178353	LCE1E	-0.101885	0.499065	1
NM_178352	LCE1D	0.0855043	0.492987	1
NM_173080	SPRR4	0.104724	0.26741	1
NM_030663	SMCP	-0.159168	0.134655	1
NM_001199828	SPRR1A	0.123537	0.132144	1
NM_005547	IVL	0.0544552	0.406689	1
NM_005416	SPRR3	0.0108881	0.34949	1
NM_001017418	SPRR2B	0.111213	0.486948	1
NM_003125	SPRR1B	0.0678589	0.542693	1
NM_005988	SPRR2A	-0.00787831	0.942722	1
NM_006945	SPRR2D	-0.279483	0.202937	1
NM_001024209	SPRR2E	-0.0346639	0.996178	1
NM_001014450	SPRR2F	0.0112993	0.957979	1
NM_001195571	PRR9	-0.140743	0.216993	1
NM_001014291	SPRR2G	0.0835195	0.320533	1
NM_001010857	LELP1	-0.0850923	0.406689	1
NM_005621	S100A12	-0.145331	0.173734	1
NM_020393	PGLYRP4	0.242169	0.0331137	1
NM_052891	PGLYRP3	0.00762163	0.988535	1
NM_002965	S100A9	0.191953	0.0542687	1
NM_000427	LORICRIN	0.22661	0.104743	1
NM_001319201	S100A8	0.0307531	0.806988	1
NM_001319198	S100A8	0.0356837	0.601413	1
NM_001319197	S100A8	0.077162	0.549076	1
NM_002963	S100A7	0.186803	0.0648253	1
NM_176823	S100A7A	0.100031	0.122459	1
NM_001045479	S100A7L2	0.0507274	0.315862	1
NM_019554	S100A4	0.0816738	0.247151	1
NM_005978	S100A2	0.121874	0.412149	1
NM_006271	S100A1	-0.0224361	0.662808	1
NM_080388	S100A16	-0.0852964	0.344553	1
NM_020672	S100A14	-0.049864	0.555495	1
NM_014624	S100A6	0.114609	0.395898	1
NM_005979	S100A13	-0.0357776	0.74822	1
NM_002962	S100A5	-0.0392379	0.770109	1
NM_002960	S100A3	-0.0899592	0.280093	1
NM_001317008	S100A16	-0.00294795	0.777447	1
NM_001024213	S100A13	-0.0139899	0.662808	1
NM_001024212	S100A13	0.134379	0.183102	1
NM_001024211	S100A13	-0.00950672	0.821864	1
NM_001024210	S100A13	-0.275463	0.1618	1
NM_004515	ILF2	0.121112	0.385279	1
NM_001324475	INTS3	-0.00594499	0.325248	1
NM_012437	SNAPIN	-0.0860885	0.799575	1
NM_000906	NPR1	-0.107917	0.178932	1
NM_001255979	CREB3L4	0.0361832	0.542693	1
[truncated: 24,598 more rows]

## Sheet: GO of All Diff in T21
ONTOLOGY	ID	Description	GeneRatio	BgRatio	pvalue	p.adjust	qvalue	geneID	Count	definition
CC	GO:0005801	cis-Golgi network	6/181	73/19550	5.90095e-05	0.0173488	0.0163363	MAN2A1/CCN2/SCYL1/GOLGA8M/KDELR1/GPR108	6	The network of interconnected tubular and cisternal structures located at the convex side of the Golgi apparatus, which abuts the endoplasmic reticulum.
CC	GO:0005912	adherens junction	8/181	170/19550	0.000189297	0.0278267	0.0262027	PDLIM7/ACTB/FERMT2/TJP1/ANXA2/CDH1/SMAD7/ARVCF	8	A cell-cell junction composed of the epithelial cadherin-catenin complex. The epithelial cadherins, or E-cadherins, of each interacting cell extend through the plasma membrane into the extracellular space and bind to each other. The E-cadherins bind to catenins on the cytoplasmic side of the membrane, where the E-cadherin-catenin complex binds to cytoskeletal components and regulatory and signali…
CC	GO:0016605	PML body	6/181	103/19550	0.000394311	0.0386425	0.0363873	SATB1/PPARGC1A/TP53INP1/ZBED1/TP53INP2/SUMO3	6	A class of nuclear body; they react against SP100 auto-antibodies (PML, promyelocytic leukemia); cells typically contain 10-30 PML bodies per nucleus; alterations in the localization of PML bodies occurs after viral infection.
CC	GO:0097440	apical dendrite	3/181	18/19550	0.000574922	0.0422567	0.0397906	PPARGC1A/MYO1D/ITSN1	3	A dendrite that emerges near the apical pole of a neuron. In bipolar neurons, apical dendrites are located on the opposite side of the soma from the axon.
MF	GO:0001227	DNA-binding transcription repressor activity, RNA polymerase II-specific	11/176	310/18368	0.000205538	0.0340067	0.0322926	BATF3/ZNF124/SATB1/IRX2/ZNF705D/ZNF750/ZBTB14/ZNF77/CEBPB/BACH1/ETS2	11	A DNA-binding transcription factor activity that represses or decreases the transcription of specific gene sets transcribed by RNA polymerase II.
MF	GO:0001217	DNA-binding transcription repressor activity	11/176	313/18368	0.000223329	0.0340067	0.0322926	BATF3/ZNF124/SATB1/IRX2/ZNF705D/ZNF750/ZBTB14/ZNF77/CEBPB/BACH1/ETS2	11	A DNA-binding transcription factor activity that represses or decreases the transcription of specific gene sets.
MF	GO:0003712	transcription coregulator activity	14/176	489/18368	0.000269894	0.0340067	0.0322926	CAMTA1/PPARGC1A/PPARGC1B/ZBED1/ARID5B/LCOR/SF1/ATN1/PA2G4/NAB2/TDRD3/SIN3A/TCF25/TLE5	14	A transcription regulator activity that modulates the transcription of specific gene sets via binding to a DNA-bound DNA-binding transcription factor, either on its own or as part of a complex. Coregulators often act by altering chromatin structure and modifications. For example, one class of transcription coregulators modifies chromatin structure through covalent modification of histones. A seco…
MF	GO:0048185	activin binding	3/176	15/18368	0.000361522	0.0340966	0.032378	FST/TGFBR1/SMAD7	3	Binding to activin, a dimer of inhibin-beta subunits.
MF	GO:0003714	transcription corepressor activity	8/176	187/18368	0.000451013	0.0340966	0.032378	LCOR/SF1/ATN1/PA2G4/NAB2/SIN3A/TCF25/TLE5	8	A transcription coregulator activity that represses or decreases the transcription of specific gene sets via binding to a DNA-bound DNA-binding transcription factor, either on its own or as part of a complex. Corepressors often act by altering chromatin structure and modifications. For example, one class of transcription corepressors modifies chromatin structure through covalent modification of h…

## Sheet: KEGG of All Diff in T21
ID	Description	GeneRatio	BgRatio	pvalue	p.adjust	qvalue	geneID	Count
hsa04390	Hippo signaling pathway	14/93	235/11118	8.14085e-09	1.14786e-06	1.01118e-06	P62140/V9HW04/P29279/Q5M8T4/P60709/Q1KLZ0/B4DXN7/P36897/Q5T7S2/B3GN61/P12830/A0A0U2ZQU7/Q9BYG4/O15105	14
hsa04520	Adherens junction	10/93	119/11118	5.15824e-08	3.63656e-06	3.20354e-06	P60709/Q1KLZ0/B4DXN7/P36897/Q5T7S2/Q6MZU1/Q07157/B3GN61/P12830/A0A0U2ZQU7	10
hsa04350	TGF-beta signaling pathway	9/93	143/11118	2.87813e-06	0.000135272	0.000119165	P19883/A0A024QZU6/B4DXN7/P36897/Q5T7S2/P08047/Q96B86/Q13253/O15105	9
hsa04371	Apelin signaling pathway	10/93	222/11118	1.5638e-05	0.000551239	0.000485601	Q9UBK2/A0A024R9Q9/P29279/Q5M8T4/B4DXN7/P36897/Q5T7S2/B3GN61/P12830/A0A0U2ZQU7	10
hsa00513	Various types of N-glycan biosynthesis	5/93	52/11118	7.00207e-05	0.00197458	0.00173946	O60476/P04843/Q16706/A0A0S2Z3W3/P06865	5
hsa05110	Vibrio cholerae infection	5/93	84/11118	0.000674048	0.0158401	0.013954	P60709/Q1KLZ0/Q6MZU1/Q07157/P24390	5
hsa05100	Bacterial invasion of epithelial cells	5/93	125/11118	0.00391698	0.0788991	0.0695043	P60709/Q1KLZ0/B3GN61/P12830/A0A0U2ZQU7	5
hsa04931	Insulin resistance	5/93	155/11118	0.00959952	0.169192	0.149045	P62140/V9HW04/Q9UBK2/A0A024R9Q9/Q86YN6	5

## Sheet: GO of Upgrade in T21
ONTOLOGY	ID	Description	GeneRatio	BgRatio	pvalue	p.adjust	qvalue	Count

## Sheet: GO of Downgrade in T21
ONTOLOGY	ID	Description	GeneRatio	BgRatio	pvalue	p.adjust	qvalue	geneID	Count	definition
BP	GO:0043393	regulation of protein binding	8/112	196/18723	2.3462e-05	0.0267696	0.0255686	TGFBR1/SPPL3/ANXA2/RGMA/AKTIP/ARRB2/NOG/TLE5	8	Any process that modulates the frequency, rate or extent of protein binding.
BP	GO:0030038	contractile actin filament bundle assembly	6/112	106/18723	4.20245e-05	0.0267696	0.0255686	CCN2/ARHGEF10/TGFBR1/FAM171A1/FERMT2/TJP1	6	Assembly of actin filament bundles in which the filaments are loosely packed (approximately 30-60 nm apart) and arranged with opposing polarities; the loose packing allows myosin (usually myosin-II) to enter the bundle.
BP	GO:0043149	stress fiber assembly	6/112	106/18723	4.20245e-05	0.0267696	0.0255686	CCN2/ARHGEF10/TGFBR1/FAM171A1/FERMT2/TJP1	6	The aggregation, arrangement and bonding together of a set of components to form a stress fiber. A stress fiber is a contractile actin filament bundle that consists of short actin filaments with alternating polarity.
BP	GO:0051492	regulation of stress fiber assembly	5/112	91/18723	0.000216279	0.0669316	0.0639287	CCN2/ARHGEF10/TGFBR1/FERMT2/TJP1	5	Any process that modulates the frequency, rate or extent of the assembly of a stress fiber, a bundle of microfilaments and other proteins found in fibroblasts.
BP	GO:1904263	positive regulation of TORC1 signaling	3/112	20/18723	0.000220564	0.0669316	0.0639287	WAC/SIK3/KLHL22	3
BP	GO:0051496	positive regulation of stress fiber assembly	4/112	52/18723	0.000263288	0.0669316	0.0639287	CCN2/ARHGEF10/TGFBR1/FERMT2	4	Any process that activates or increases the frequency, rate or extent of the assembly of a stress fiber, a bundle of microfilaments and other proteins found in fibroblasts.
BP	GO:1900120	regulation of receptor binding	3/112	22/18723	0.00029537	0.0669316	0.0639287	ANXA2/RGMA/NOG	3
BP	GO:0051098	regulation of binding	9/112	363/18723	0.00033322	0.0669316	0.0639287	TGFBR1/SPPL3/ANXA2/RGMA/AKTIP/ARRB2/NOG/TLE5/SUMO3	9	Any process that modulates the frequency, rate or extent of binding, the selective interaction of a molecule with one or more specific sites on another molecule.
BP	GO:0110020	regulation of actomyosin structure organization	5/112	100/18723	0.00033554	0.0669316	0.0639287	CCN2/ARHGEF10/TGFBR1/FERMT2/TJP1	5	Any process that modulates the frequency, rate or extent of the assembly, arrangement of constituent parts, or disassembly of cytoskeletal structures containing both actin and myosin or paramyosin.
BP	GO:0051017	actin filament bundle assembly	6/112	157/18723	0.000363655	0.0669316	0.0639287	CCN2/ARHGEF10/TGFBR1/FAM171A1/FERMT2/TJP1	6	The assembly of actin filament bundles; actin filaments are on the same axis but may be oriented with the same or opposite polarities and may be packed with different levels of tightness.
BP	GO:0061572	actin filament bundle organization	6/112	161/18723	0.000415845	0.0669316	0.0639287	CCN2/ARHGEF10/TGFBR1/FAM171A1/FERMT2/TJP1	6	A process that results in the assembly, arrangement of constituent parts, or disassembly of an actin filament bundle.
BP	GO:0032231	regulation of actin filament bundle assembly	5/112	105/18723	0.000420293	0.0669316	0.0639287	CCN2/ARHGEF10/TGFBR1/FERMT2/TJP1	5	Any process that modulates the frequency, rate or extent of the assembly of actin filament bundles.
BP	GO:0032233	positive regulation of actin filament bundle assembly	4/112	63/18723	0.00055079	0.0809661	0.0773335	CCN2/ARHGEF10/TGFBR1/FERMT2	4	Any process that activates or increases the frequency, rate or extent of the assembly of actin filament bundles.
CC	GO:0016605	PML body	6/115	103/19550	3.26634e-05	0.00725127	0.00667021	SATB1/PPARGC1A/TP53INP1/ZBED1/TP53INP2/SUMO3	6	A class of nuclear body; they react against SP100 auto-antibodies (PML, promyelocytic leukemia); cells typically contain 10-30 PML bodies per nucleus; alterations in the localization of PML bodies occurs after viral infection.
CC	GO:0097440	apical dendrite	3/115	18/19550	0.000151702	0.0168389	0.0154896	PPARGC1A/MYO1D/ITSN1	3	A dendrite that emerges near the apical pole of a neuron. In bipolar neurons, apical dendrites are located on the opposite side of the soma from the axon.

## Sheet: KEGG of Upgrade in T21
ID	Description	GeneRatio	BgRatio	pvalue	p.adjust	qvalue	geneID	Count
hsa00513	Various types of N-glycan biosynthesis	4/37	52/11118	2.50704e-05	0.00215605	0.00147783	O60476/P04843/A0A0S2Z3W3/P06865	4
hsa04217	Necroptosis	5/37	229/11118	0.000903424	0.0290842	0.0199353	A0A024R525/P02794/P07900/K9JA46/Q8IUW3	5
hsa04390	Hippo signaling pathway	5/37	235/11118	0.00101457	0.0290842	0.0199353	P62140/V9HW04/P60709/Q1KLZ0/O15105	5
hsa00310	Lysine degradation	3/37	76/11118	0.00201822	0.0378502	0.0259438	O60568/Q9UG85/Q9H9B1	3
hsa04611	Platelet activation	4/37	183/11118	0.0030693	0.0378502	0.0259438	P62140/V9HW04/P60709/Q1KLZ0	4
hsa00511	Other glycan degradation	2/37	25/11118	0.00308083	0.0378502	0.0259438	A0A0S2Z3W3/P06865	2
hsa00604	Glycosphingolipid biosynthesis - ganglio series	2/37	25/11118	0.00308083	0.0378502	0.0259438	A0A0S2Z3W3/P06865	2
hsa00603	Glycosphingolipid biosynthesis - globo and isoglobo series	2/37	28/11118	0.00385757	0.0405405	0.0277879	A0A0S2Z3W3/P06865	2
hsa00531	Glycosaminoglycan degradation	2/37	30/11118	0.00442074	0.0405405	0.0277879	A0A0S2Z3W3/P06865	2
hsa03018	RNA degradation	3/37	104/11118	0.0049047	0.0405405	0.0277879	Q01780/Q9Y4Y9/A0A090N8Y5	3
hsa05418	Fluid shear stress and atherosclerosis	4/37	212/11118	0.00518542	0.0405405	0.0277879	P60709/Q1KLZ0/P07900/K9JA46	4
hsa05412	Arrhythmogenic right ventricular cardiomyopathy	3/37	112/11118	0.00602794	0.0432002	0.0296109	P60709/Q1KLZ0/Q14126	3
hsa04921	Oxytocin signaling pathway	4/37	231/11118	0.0070053	0.0463428	0.0317649	P62140/V9HW04/P60709/Q1KLZ0	4
hsa04141	Protein processing in endoplasmic reticulum	4/37	260/11118	0.0105302	0.0646856	0.0443377	O60476/P04843/P07900/K9JA46	4
hsa04931	Insulin resistance	3/37	155/11118	0.0146011	0.0837131	0.0573798	P62140/V9HW04/Q86YN6	3
hsa00514	Other types of O-glycan biosynthesis	2/37	60/11118	0.016898	0.0908265	0.0622557	O60568/Q9UG85	2
hsa00510	N-Glycan biosynthesis	2/37	67/11118	0.0208037	0.094525	0.0647907	O60476/P04843	2
hsa05205	Proteoglycans in cancer	4/37	319/11118	0.0208577	0.094525	0.0647907	P62140/V9HW04/P60709/Q1KLZ0	4
hsa04510	Focal adhesion	4/37	320/11118	0.0210721	0.094525	0.0647907	P62140/V9HW04/P60709/Q1KLZ0	4
hsa04216	Ferroptosis	2/37	69/11118	0.0219826	0.094525	0.0647907	A0A024R525/P02794	2
hsa04919	Thyroid hormone signaling pathway	3/37	186/11118	0.0235992	0.0954667	0.0654362	P60709/Q1KLZ0/Q96ST3	3
hsa00520	Amino sugar and nucleotide sugar metabolism	2/37	73/11118	0.0244217	0.0954667	0.0654362	A0A0S2Z3W3/P06865	2
hsa04810	Regulation of actin cytoskeleton	4/37	352/11118	0.0286676	0.107192	0.0734731	P62140/V9HW04/P60709/Q1KLZ0	4
hsa05110	Vibrio cholerae infection	2/37	84/11118	0.0316661	0.108135	0.0741193	P60709/Q1KLZ0	2
hsa04923	Regulation of lipolysis in adipocytes	2/37	85/11118	0.0323622	0.108135	0.0741193	A0A0S2Z5D6/Q8WTS1	2
hsa05132	Salmonella infection	4/37	369/11118	0.0332934	0.108135	0.0741193	P60709/Q1KLZ0/P07900/K9JA46	4
hsa00561	Glycerolipid metabolism	2/37	88/11118	0.0344866	0.108135	0.0741193	A0A140VK38/Q8NEB5	2
hsa04978	Mineral absorption	2/37	89/11118	0.0352067	0.108135	0.0741193	A0A024R525/P02794	2
hsa04370	VEGF signaling pathway	2/37	93/11118	0.0381451	0.11312	0.0775363	A0A024R2W7/Q16644	2
hsa04720	Long-term potentiation	2/37	108/11118	0.049953	0.143198	0.0981532	P62140/V9HW04	2
hsa05031	Amphetamine addiction	2/37	112/11118	0.0532997	0.14782	0.101321	P62140/V9HW04	2
hsa04971	Gastric acid secretion	2/37	114/11118	0.0550027	0.14782	0.101321	P60709/Q1KLZ0	2
hsa04520	Adherens junction	2/37	119/11118	0.0593436	0.154653	0.106004	P60709/Q1KLZ0	2
hsa04657	IL-17 signaling pathway	2/37	122/11118	0.0620039	0.156833	0.107499	P07900/K9JA46	2
hsa05100	Bacterial invasion of epithelial cells	2/37	125/11118	0.0647048	0.158989	0.108976	P60709/Q1KLZ0	2
hsa03015	mRNA surveillance pathway	2/37	129/11118	0.0683672	0.161044	0.110385	P62140/V9HW04	2
hsa00564	Glycerophospholipid metabolism	2/37	132/11118	0.0711588	0.161044	0.110385	A0A140VK38/Q8NEB5	2
hsa05410	Hypertrophic cardiomyopathy	2/37	132/11118	0.0711588	0.161044	0.110385	P60709/Q1KLZ0	2
hsa05416	Viral myocarditis	2/37	138/11118	0.0768526	0.16933	0.116065	P60709/Q1KLZ0	2
hsa05414	Dilated cardiomyopathy	2/37	141/11118	0.0797529	0.16933	0.116065	P60709/Q1KLZ0	2
hsa04750	Inflammatory mediator regulation of TRP channels	2/37	142/11118	0.0807273	0.16933	0.116065	P62140/V9HW04	2
hsa04914	Progesterone-mediated oocyte maturation	2/37	147/11118	0.0856556	0.173304	0.118789	P07900/K9JA46	2
hsa05215	Prostate cancer	2/37	148/11118	0.0866522	0.173304	0.118789	P07900/K9JA46	2

## Sheet: KEGG of Downgrade in T21
ID	Description	GeneRatio	BgRatio	pvalue	p.adjust	qvalue	geneID	Count
hsa04520	Adherens junction	8/56	119/11118	1.25743e-07	6.16942e-06	5.18148e-06	B4DXN7/P36897/Q5T7S2/Q6MZU1/Q07157/B3GN61/P12830/A0A0U2ZQU7	8
hsa04371	Apelin signaling pathway	10/56	222/11118	1.31264e-07	6.16942e-06	5.18148e-06	Q9UBK2/A0A024R9Q9/P29279/Q5M8T4/B4DXN7/P36897/Q5T7S2/B3GN61/P12830/A0A0U2ZQU7	10
hsa04350	TGF-beta signaling pathway	8/56	143/11118	5.19255e-07	1.627e-05	1.36646e-05	P19883/A0A024QZU6/B4DXN7/P36897/Q5T7S2/P08047/Q96B86/Q13253	8
hsa04390	Hippo signaling pathway	9/56	235/11118	2.3051e-06	5.41698e-05	4.54954e-05	P29279/Q5M8T4/B4DXN7/P36897/Q5T7S2/B3GN61/P12830/A0A0U2ZQU7/Q9BYG4	9
hsa05226	Gastric cancer	6/56	234/11118	0.00109862	0.020654	0.0173466	B4DXN7/P36897/Q5T7S2/B3GN61/P12830/A0A0U2ZQU7	6
hsa05216	Thyroid cancer	3/56	65/11118	0.00423941	0.0664175	0.0557818	B3GN61/P12830/A0A0U2ZQU7	3
hsa05219	Bladder cancer	3/56	73/11118	0.00586789	0.0787974	0.0661792	B3GN61/P12830/A0A0U2ZQU7	3
hsa05110	Vibrio cholerae infection	3/56	84/11118	0.00864674	0.101599	0.0853297	Q6MZU1/Q07157/P24390	3
hsa04928	Parathyroid hormone synthesis, secretion and action	4/56	169/11118	0.0102436	0.10168	0.0853979	P08047/P32121/Q86VV6/Q9Y5R2	4
hsa04144	Endocytosis	6/56	373/11118	0.0108171	0.10168	0.0853979	B4DXN7/P36897/Q5T7S2/P32121/Q9BYG4/Q9UL26	6
hsa05213	Endometrial cancer	3/56	98/11118	0.0131374	0.112265	0.0942875	B3GN61/P12830/A0A0U2ZQU7	3
hsa04926	Relaxin signaling pathway	4/56	199/11118	0.0177287	0.130328	0.109458	B4DXN7/P36897/Q5T7S2/P32121	4
hsa04068	FoxO signaling pathway	4/56	200/11118	0.0180241	0.130328	0.109458	A0A1X9RU27/B4DXN7/P36897/Q5T7S2	4
hsa05218	Melanoma	3/56	122/11118	0.0234395	0.140902	0.118339	B3GN61/P12830/A0A0U2ZQU7	3
hsa05220	Chronic myeloid leukemia	3/56	123/11118	0.0239414	0.140902	0.118339	B4DXN7/P36897/Q5T7S2	3
hsa05100	Bacterial invasion of epithelial cells	3/56	125/11118	0.0249628	0.140902	0.118339	B3GN61/P12830/A0A0U2ZQU7	3
hsa05212	Pancreatic cancer	3/56	126/11118	0.0254823	0.140902	0.118339	B4DXN7/P36897/Q5T7S2	3
hsa05210	Colorectal cancer	3/56	143/11118	0.0352023	0.183834	0.154396	B4DXN7/P36897/Q5T7S2	3
