# Supplementary material for: Integrative analyses of maternal plasma cell-free DNA nucleosome footprint differences reveal chromosomal aneuploidy fetuses gene expression profile
Source: J Transl Med. 2022 Nov 18;20:536. doi: 10.1186/s12967-022-03735-7 (PMC9673457; doi:10.1186/s12967-022-03735-7)
Supplement: Supplementary file 4 — Additional file 4: Table S4. Differential promoter coverage genes and GO, KEGG enrichment analysis results of differential genes for pregnant women with trisomy 13. [file 12967_2022_3735_MOESM4_ESM.xlsx]

## Sheet: T13
REFSEQ	symbol	diff.log2	pval	padj
NM_001350218	SGIP1	0.0677668	0.824539	1
NM_001308203	SGIP1	0.129355	0.438971	1
NM_001350398	AZIN2	-0.138379	0.39079	1
NM_001323575	AGBL4	0.0994376	0.63581	1
NM_001145278	NECAP2	-0.00821465	0.843251	1
NM_001350402	AZIN2	-0.0966373	0.424873	1
NM_001350399	AZIN2	-0.138122	0.411039	1
NM_013943	CLIC4	-0.248696	0.450868	1
NM_001080397	SLC45A1	-0.0139983	0.446119	1
NM_003243	TGFBR3	0.0572549	0.732648	1
NM_001195684	TGFBR3	0.125949	0.160876	1
NM_001918	DBT	-0.130293	0.183739	1
NM_001303229	PRUNE1	-0.0475017	0.759886	1
NM_022457	COP1	-0.140486	0.182527	1
NM_030806	C1orf21	-0.431651	0.107622	1
NM_173083	LIN9	-0.252891	0.0730906	1
NM_001270410	LIN9	-0.223979	0.0326213	1
NM_001330306	C1orf159	-0.220731	0.0253677	1
NM_001350806	PRKCZ	-0.125512	0.20889	1
NM_012405	ICMT	-0.324994	0.384176	1
NM_001242874	PRKCZ	-0.0915646	0.28227	1
NM_001349610	CAMTA1	-0.238656	0.980671	1
NM_002744	PRKCZ	-0.250775	0.467949	1
NM_022114	PRDM16	-0.228911	0.327732	1
NM_001033582	PRKCZ	0.0599135	0.653024	1
NM_001099850	PRAMEF18	0.117071	0.438971	1
NM_001291381	PRAMEF33	-0.0294193	0.577121	1
NM_001039361	PRAMEF10	-0.0328753	0.544757	1
NM_001350166	USP48	0.099575	0.63581	1
NM_032409	PINK1	-0.190084	0.384176	1
NM_001309193	EPHB2	0.218757	0.703938	1
NM_006559	KHDRBS1	-0.218264	0.22697	1
NM_001166007	EPB41	-0.0524563	0.321806	1
NM_001145454	STMN1	-0.167191	0.102391	1
NM_014676	PUM1	0.200454	0.460608	1
NM_006600	NUDC	-0.229547	0.157281	1
NM_001282562	EYA3	-0.122497	0.2769	1
NM_001166006	EPB41	-0.414342	0.0812795	1
NM_005119	THRAP3	0.127617	0.521083	1
NM_001281956	CSMD2	-0.240644	0.0949223	1
NM_001321473	THRAP3	0.110915	0.577121	1
NM_005066	SFPQ	-0.226763	0.476622	1
NM_012090	MACF1	-0.0164927	1	1
NM_052896	CSMD2	-0.383283	0.0215724	1
NM_001355224	CCDC30	0.195068	0.200247	1
NM_001355226	CCDC30	0.146426	0.261202	1
NM_001355227	CCDC30	0.106262	0.497943	1
NM_021639	GPBP1L1	-0.00137811	0.644394	1
NM_130440	PTPRF	0.239567	0.750772	1
NM_001319956	RNF220	0.0937981	0.28771	1
NM_001194986	TRABD2B	0.0840634	0.490351	1
NM_001319957	RNF220	-0.0379433	0.679188	1
NM_001329138	PTPRF	0.290609	0.0125156	1
NM_007051	FAF1	0.431919	0.0513783	1
NM_015306	USP24	-0.126212	0.28227	1
NM_153035	TCEANC2	0.064839	0.778211	1
NM_001193617	SCP2	-0.0427365	0.310163	1
NM_001353983	DAB1	-0.165613	0.0925306	1
NM_002867	RAB3B	0.00294091	0.759886	1
NM_021080	DAB1	-0.198658	0.0856409	1
NM_001353985	DAB1	-0.229354	0.0440809	1
NM_001353986	DAB1	-0.228783	0.0750726	1
NM_001350798	FGGY	0.106906	0.482821	1
NM_020925	CACHD1	0.00333051	0.81522	1
NM_001293274	CACHD1	-0.122025	0.251081	1
NM_001206739	ITGB3BP	-0.187737	0.118706	1
NM_018291	FGGY	0.174087	0.200247	1
NM_002303	LEPR	0.15125	0.310163	1
NM_001145512	NFIA	-0.0338035	0.653024	1
NM_001145511	NFIA	-0.00516969	0.661701	1
NM_005595	NFIA	-0.0505944	0.750772	1
NM_003368	USP1	-0.188478	0.244373	1
NM_001198689	LEPR	0.218321	0.327732	1
NM_001017416	USP1	-0.131961	0.384176	1
NM_020794	LRRC7	0.123728	0.168248	1
NM_001330635	LRRC7	0.0348363	0.89039	1
NM_173808	NEGR1	-0.0977607	0.490351	1
NM_001350216	LRRC7	0.0768315	0.759886	1
NM_001349107	ST6GALNAC3	0.237348	0.172027	1
NM_005482	PIGK	0.19554	0.113059	1
NM_032270	LRRC8C	0.126002	0.476622	1
NM_012128	CLCA4	0.330337	0.293219	1
NM_001134445	DDAH1	-0.109097	0.231657	1
NM_002061	GCLM	0.148778	0.608162	1
NM_001252269	DIPK1A	-0.0350177	0.644394	1
NM_001252271	DIPK1A	-0.0581706	0.293219	1
NM_001312688	NTNG1	0.11173	0.266366	1
NM_001113226	NTNG1	0.114208	0.236411	1
NM_001330665	NTNG1	0.288299	0.12457	1
NM_001323041	PHTF1	-0.164719	0.918869	1
NM_001204269	KCNA2	0.0327757	0.89039	1
NM_001042679	RHOC	0.0863942	0.78742	1
NM_001042678	RHOC	0.195719	0.438971	1
NM_006496	GNAI3	-0.066731	0.618788	1
NM_001323042	PHTF1	-0.242659	0.670422	1
NM_006608	PHTF1	-0.231523	0.870631	1
NM_002884	RAP1A	-0.207917	0.384176	1
NM_001291896	RAP1A	-0.274067	0.460608	1
NM_024408	NOTCH2	-0.31342	0.164531	1
NM_006784	WDR3	-0.0884836	0.750772	1
NM_001037501	NBPF8	-0.0189593	0.843251	1
NM_001037675	NBPF9	0.030422	0.947452	1
NM_001201326	PDZK1	-0.0353929	0.490351	1
NM_020205	OTUD7B	-0.242707	0.143501	1
NM_001278267	NBPF20	0.0491691	1	1
NM_001302371	NBPF10	0.042359	0.601966	1
NM_001351365	NBPF19	-0.010106	0.696847	1
NM_001349679	TPM3	0.172845	0.251081	1
NM_001323615	SMG5	-0.0526719	0.271598	1
NM_001323617	SMG5	-0.134458	0.411039	1
NM_001278191	TPM3	0.0037228	0.976101	1
NM_015327	SMG5	-0.109018	0.104981	1
NM_152263	TPM3	-0.0284542	0.985659	1
NM_021642	FCGR2A	-0.174119	0.153746	1
NM_002585	PBX1	-0.235707	0.172027	1
NM_001353130	PBX1	-0.0869475	0.371151	1
NM_001350204	DNM3	0.0480208	0.552764	1
NM_022093	TNN	-0.0839384	0.246123	1
NM_001163629	MROH9	-0.041234	0.217797	1
NM_025063	MROH9	-0.0315768	0.266366	1
NM_005092	TNFSF18	-0.0783186	0.928387	1
NM_003101	SOAT1	-0.181981	0.136963	1
NM_001174061	SMG7	-0.0197037	0.58535	1
NM_170692	RASAL2	-0.241197	0.0555034	1
NM_001137669	RGSL1	-0.0855275	0.404222	1
NM_021165	BRINP2	-0.119854	0.246123	1
NM_032360	ACBD6	-0.0912422	0.31595	1
NM_000963	PTGS2	-0.24691	0.0620682	1
NM_133494	NEK7	-0.272006	0.172027	1
NM_194314	ZBTB41	-0.10898	0.236411	1
NM_001331029	PPP1R12B	0.204206	0.18777	1
NM_015326	SRGAP2	-0.0703084	0.39079	1
NM_001122834	HHAT	0.157567	0.475354	1
NM_001243511	ESRRG	-0.156039	0.164531	1
NM_018664	BATF3	0.271509	0.909363	1
NM_001170588	HHAT	0.184425	0.304446	1
NM_206595	ESRRG	-0.0689489	0.521083	1
NM_001170580	HHAT	0.209113	0.364742	1
NM_001243513	ESRRG	-0.31518	0.0100991	1
NM_001243505	ESRRG	0.0113204	0.679188	1
NM_001243509	ESRRG	-0.130161	0.251081	1
NM_001350125	ESRRG	-0.0517571	0.544757	1
NM_001350122	ESRRG	0.0833797	0.610352	1
NM_206933	USH2A	0.042595	0.364742	1
NM_001373	DNAH14	0.297018	0.528916	1
NM_004446	EPRS1	0.124832	0.304446	1
NM_018230	NUP133	0.108401	0.86205	1
NM_145214	TRIM11	-0.123181	0.446119	1
NM_001301365	LYST	0.0599414	0.63581	1
NM_001350113	RGS7	-0.151416	0.115856	1
NM_001291939	MTR	0.371682	0.0336405	1
NM_001350116	RGS7	-0.00688807	0.679188	1
NM_000081	LYST	-0.352177	0.160876	1
NM_001167740	SMYD3	0.0448624	0.928387	1
NM_018012	KIF26B	-0.064775	0.769033	1
NM_032752	ZNF496	-0.202406	0.446119	1
NM_022743	SMYD3	-0.0623785	0.732648	1
NM_001001918	OR14C36	-0.337876	0.0901869	1
NM_001198993	NADK	0.130274	0.63581	1
NM_001198994	NADK	-0.0129854	0.769033	1
NM_033489	CDK11B	-0.0151136	0.89039	1
NM_017900	AURKAIP1	-0.175768	0.937915	1
NM_001353641	NADK	-0.042758	0.956996	1
NM_023018	NADK	0.169305	0.781427	1
NM_001353642	NADK	0.198862	0.753786	1
NM_001014980	C1QTNF12	0.205744	0.732648	1
NM_003820	TNFRSF14	0.0637987	0.482821	1
NM_001242672	TTC34	-0.340992	0.0403359	1
NM_003036	SKI	0.054208	0.487571	1
NM_001409	MEGF6	0.130246	0.513309	1
NM_004402	DFFB	-0.346322	0.200247	1
NM_152492	CCDC27	-0.0916648	0.453331	1
NM_001042478	AJAP1	0.027734	0.753786	1
NM_172130	KCNAB2	0.0735058	0.723641	1
NM_015102	NPHP4	0.190214	0.534422	1
NM_001199862	KCNAB2	-0.0408929	0.670422	1
NM_001199861	KCNAB2	0.229265	0.415469	1
NM_001199860	KCNAB2	0.00228596	0.995219	1
NM_001199863	KCNAB2	-0.0841975	0.358401	1
NM_007274	ACOT7	0.11726	0.0673967	1
NM_181864	ACOT7	-0.133411	0.191864	1
NM_001265592	PLEKHG5	0.068348	0.750772	1
NM_001042663	PLEKHG5	-0.0529828	0.544757	1
NM_198681	PLEKHG5	-0.0659461	0.644394	1
NM_001349621	CAMTA1	0.232551	0.0176706	1
NM_016831	PER3	0.299274	0.50315	1
NM_001349617	CAMTA1	0.227246	0.0134263	1
NM_001349625	CAMTA1	0.233392	0.0143942	1
NM_001561	TNFRSF9	-0.106805	0.653024	1
NM_001042681	RERE	0.417344	0.217797	1
NM_024980	GPR157	-0.0449649	0.843251	1
NM_004285	H6PD	0.0149932	0.438971	1
NM_001282587	H6PD	-0.0721113	0.22235	1
NM_015074	KIF1B	-0.20696	0.310163	1
NM_006048	UBE4B	-0.0872907	0.191864	1
NM_020248	CTNNBIP1	-0.425264	0.0587107	1
NM_014944	CLSTN1	-0.245508	0.339792	1
NM_001170754	C1orf127	-0.324574	0.00106697	1
NM_017766	CASZ1	-0.331535	0.110314	1
NM_002685	EXOSC10	0.25465	0.358401	1
NM_004958	MTOR	-0.175804	0.384176	1
NM_004565	PEX14	-0.0736092	0.371151	1
NM_001243	TNFRSF8	-0.278	0.0878905	1
NM_015378	VPS13D	-0.42061	0.256107	1
NM_014874	MFN2	-0.132453	0.769033	1
NM_020350	AGTRAP	0.212745	0.251081	1
NM_001306072	PRAMEF26	-0.271238	0.0182751	1
NM_001100631	PRAMEF22	0.118134	0.431889	1
NM_001013630	AADACL4	-0.0953679	0.236411	1
NM_052929	FHAD1	-0.154105	0.880926	1
NM_015209	KAZN	0.118522	0.918869	1
NM_001018001	KAZN	0.067477	0.304446	1
NM_001018000	KAZN	-0.18291	0.601966	1
NM_001017999	KAZN	-0.108182	0.160876	1
NM_015001	SPEN	-0.638925	0.0139029	0.0412086
NM_015291	DNAJC16	-0.235036	0.618788	1
NM_018994	FBXO42	-0.135841	0.505596	1
NM_017940	NBPF1	0.0408599	0.769033	1
NM_001135248	MFAP2	-0.0581983	0.475354	1
NM_001135247	MFAP2	-0.0284976	0.536808	1
NM_007365	PADI2	-0.228725	0.0770977	1
NM_013358	PADI1	-0.0911382	0.339792	1
NM_001319837	ARHGEF10L	-0.102645	0.769033	1
NM_032880	IGSF21	-0.18392	0.150272	1
NM_001319838	ARHGEF10L	0.172916	0.160876	1
NM_030812	ACTL8	-0.124517	0.404222	1
NM_018125	ARHGEF10L	-0.0232853	0.833883	1
NM_001206541	CAPZB	-0.0365103	0.587228	1
NM_001282162	CAPZB	-0.080607	0.71467	1
NM_002584	PAX7	-0.119546	0.231657	1
NM_020765	UBR4	0.505051	0.0336405	0.0684425
NM_001136265	IFFO2	-0.106695	0.778211	1
NM_001349113	TMCO4	-0.0881742	0.358401	1
NM_001198803	EIF4G3	0.178144	0.778211	1
NM_001198802	EIF4G3	0.101248	0.796659	1
NM_001127501	ALPL	-0.00916771	0.985659	1
NM_003760	EIF4G3	0.27382	0.0253677	1
NM_016287	HP1BP3	0.37324	0.705739	1
NM_001113348	ECE1	-0.292618	0.591388	1
NM_044472	CDC42	0.288447	0.971128	1
NM_001330398	ZBTB40	-0.0570693	0.63581	1
NM_005529	HSPG2	-0.139533	0.266366	1
NM_001013693	LDLRAD2	0.125882	0.217797	1
NM_033631	LUZP1	-0.0127589	0.482821	1
NM_004091	E2F2	-0.0283192	0.995219	1
NM_003196	TCEA3	-0.00258481	0.705739	1
NM_001330409	NIPAL3	-0.163654	0.18777	1
NM_001322857	NIPAL3	-0.241113	0.0428016	1
NM_170743	IFNLR1	-0.0631277	0.644394	1
NM_001322854	NIPAL3	0.0987152	0.467949	1
NM_020448	NIPAL3	-0.181085	0.130654	1
NM_001010980	NCMAP	-0.0157461	0.705739	1
NM_001282564	MACO1	-0.0459719	0.577121	1
NM_001289010	MAN1C1	-0.276286	0.0408618	1
NM_020485	RHCE	0.0960483	0.679188	1
NM_001330441	RPS6KA1	-0.0426813	0.85264	1
NM_031286	SH3BGRL3	0.126974	0.453331	1
NM_024674	LIN28A	-0.177648	0.196023	1
NM_002953	RPS6KA1	-0.307215	0.377629	1
NM_001201404	WASF2	-0.0543359	0.750772	1
NM_032125	TMEM222	-0.124247	0.497943	1
NM_001029882	AHDC1	0.0342764	0.923117	1
NM_001048183	PHACTR4	-0.0160606	0.937915	1
NM_001135218	TAF12	0.178929	0.113059	1
NM_001048199	RCC1	0.116881	0.58535	1
NM_133177	PTPRU	0.206194	0.236411	1
NM_005626	SRSF4	0.104211	0.246123	1
NM_002379	MATN1	0.00897779	0.759886	1
NM_001195101	PTP4A2	0.225497	0.0901869	1
NM_080391	PTP4A2	0.369208	0.349816	1
NM_001300826	RNF19B	0.19053	0.364742	1
NM_001256121	S100PBP	0.195996	0.339792	1
NM_001291496	ZBTB8A	0.164875	0.251081	1
NM_012316	KPNA6	0.0217767	0.732648	1
NM_001161708	SYNC	0.00567329	0.928387	1
NM_022753	S100PBP	0.161276	0.528916	1
NM_004964	HDAC1	0.0465929	0.966546	1
NM_145238	ZSCAN20	-0.295923	0.0973626	1
NM_198040	PHC2	-0.134576	0.22697	1
NM_001080418	DLGAP3	0.0611157	0.778211	1
NM_005202	COL8A2	0.10401	0.453331	1
NM_017629	AGO4	0.187459	0.497943	1
NM_001350139	ZMYM4	-0.385023	0.179772	1
NM_024874	KIAA0319L	0.322805	0.0750726	1
NM_024852	AGO3	0.0317849	0.58535	1
NM_178548	TFAP2E	-0.013338	0.966546	1
NM_032017	STK40	-0.0179845	0.538398	1
NM_000831	GRIK3	-0.0260429	0.805926	1
NM_005540	INPP5B	0.108946	0.304446	1
NM_001350228	INPP5B	0.105318	0.298798	1
NM_024700	SNIP1	-0.0288682	0.995219	1
NM_024640	YRDC	-0.101939	0.304446	1
NM_001271851	RRAGC	-0.334155	0.22697	1
NM_012421	RLF	0.14929	0.327732	1
NM_001720	BMP8B	0.156323	0.956996	1
NM_181809	BMP8A	-0.117957	0.339792	1
NM_012236	SCMH1	0.0306093	0.482821	1
NM_001172222	SCMH1	-0.206393	0.0834374	1
NM_001172221	SCMH1	-0.0756452	0.71467	1
NM_172163	KCNQ4	0.11952	0.627275	1
NM_173642	RIMKLA	0.0996048	0.528916	1
NM_001127714	HIVEP3	0.24815	0.18777	1
NM_001198851	FOXJ3	-0.19222	0.241233	1
NM_001198850	FOXJ3	-0.274834	0.22697	1
NM_014947	FOXJ3	-0.245893	0.175868	1
NM_001198852	FOXJ3	-0.248766	0.172027	1
NM_001253357	TIE1	0.0088075	0.86205	1
NM_001195831	CFAP57	0.010156	0.670422	1
NM_015284	SZT2	0.278801	0.298798	1
NM_001354602	TMEM269	-0.0253289	0.899869	1
NM_001301700	ERI3	-0.101039	0.85264	1
NM_001270463	ST3GAL3	0.262418	0.490351	1
NM_001270459	ST3GAL3	0.254313	0.475354	1
NM_014652	IPO13	0.00753172	0.966546	1
NM_001297655	KIF2C	-0.149773	0.723641	1
NM_001166588	EIF2B3	0.0785687	0.321806	1
NM_001320800	TESK2	-0.104207	0.384176	1
NM_020883	ZSWIM5	-0.397198	0.00671307	1
NM_001297657	KIF2C	0.123082	0.39079	1
NM_001303427	P3R3URF-PIK3R3	0.0616633	0.63581	1
NM_198973	MKNK1	-0.169122	0.150272	1
NM_001324320	MAST2	-0.146386	0.102391	1
NM_001324321	MAST2	-0.222192	0.0253677	1
NM_001328653	PIK3R3	0.0693016	0.696847	1
NM_001328651	PIK3R3	-0.0523214	0.732648	1
NM_001328650	PIK3R3	-0.0555428	0.661701	1
NM_017739	POMGNT1	0.0958092	0.705739	1
NM_001114172	PIK3R3	0.0576706	0.653024	1
NM_015112	MAST2	-0.14436	0.110314	1
NM_001243766	POMGNT1	0.0211472	0.431889	1
NM_001303428	PIK3R3	0.0665823	0.824539	1
NM_001328648	PIK3R3	-0.03538	0.552764	1
NM_001290129	POMGNT1	0.0707522	0.610352	1
NM_001136140	CMPK1	0.0926	0.653024	1
NM_001320289	CYP4X1	0.0704114	0.505596	1
NM_178134	CYP4Z1	-0.125793	0.241233	1
NM_001286239	SPATA6	-0.294234	0.0182751	1
NM_001294348	ELAVL4	0.283299	0.0253677	1
NM_001144775	ELAVL4	-0.0992446	0.157281	1
NM_001144774	ELAVL4	0.220799	0.0428016	1
NM_001144777	ELAVL4	0.0686144	0.377629	1
NM_001144776	ELAVL4	0.0437855	0.601966	1
NM_001350208	OSBPL9	0.162713	0.179772	1
NM_002525	NRDC	-0.0188752	0.985659	1
NM_001297665	TTC39A	0.116906	0.339792	1
NM_001297664	TTC39A	-0.0842249	0.552764	1
NM_001297663	TTC39A	0.0671142	0.627275	1
NM_001144832	TTC39A	-0.278237	0.0230276	1
NM_001242361	NRDC	-0.00120069	0.824539	1
NM_001981	EPS15	-0.133349	0.321806	1
NM_001307931	ZYG11A	0.166814	0.824539	1
NM_001330585	CC2D1B	-0.249974	0.140203	1
NM_004799	ZFYVE9	-0.355346	0.0555034	1
NM_015269	TUT4	-0.320662	0.136963	1
NM_024646	ZYG11B	0.373367	0.160876	1
NM_004631	LRP8	0.226702	0.298798	1
NM_147193	GLIS1	-0.041973	0.741693	1
NM_016126	HSPB11	0.131017	0.937498	1
NM_018087	NDC1	0.0741119	0.601966	1
NM_001316935	HSPB11	0.242652	0.971128	1
NM_147161	ACOT11	-0.0347872	0.750772	1
NM_018070	SSBP3	-0.292244	0.20894	1
NM_001353356	CYB5RL	-0.394938	0.00198783	1
NM_003713	PLPP3	-0.410374	0.0201968	1
NM_001278544	C8B	0.0579246	0.778211	1
NM_006252	PRKAA2	-0.186458	0.39079	1
NM_001004303	FYB2	0.0676287	0.475354	1
NM_145243	OMA1	0.100771	0.723641	1
NM_001350799	FGGY	-0.0733143	0.937915	1
NM_015888	HOOK1	-0.0457701	0.593631	1
NM_001278224	FGGY	-0.0476812	0.397472	1
NM_176877	PATJ	-0.246604	0.204536	1
NM_181712	KANK4	0.0307188	0.536808	1
NM_001320269	KANK4	0.030814	0.544757	1
NM_032852	ATG4C	0.0560151	0.544757	1
NM_033407	DOCK7	-0.00449536	0.86205	1
NM_001083592	ROR1	0.0554781	0.732648	1
NM_001172818	PGM1	-0.327483	0.0440809	1
NM_001172819	PGM1	-0.235807	0.261202	1
NM_002633	PGM1	-0.21868	0.246123	1
NM_001321857	JAK1	0.271179	0.364742	1
NM_014787	DNAJC6	0.10885	0.627275	1
NM_203464	AK4	-0.151086	0.231657	1
NM_001330616	AK4	-0.0114648	0.601966	1
NM_001321854	JAK1	-0.337808	0.0453918	1
NM_018211	RAVER2	0.324673	0.28227	1
NM_001256864	DNAJC6	-0.209027	0.150272	1
NM_001321856	JAK1	0.251059	0.358401	1
NM_013410	AK4	-0.175231	0.127584	1
NM_001005353	AK4	-0.178128	0.213311	1
NM_002600	PDE4B	-0.207648	0.0391482	1
NM_001297441	PDE4B	0.197142	0.0812795	1
NM_001297440	PDE4B	-0.218904	0.0770977	1
NM_001037340	PDE4B	-0.232344	0.345926	1
NM_015139	SLC35D1	0.00935304	0.918869	1
NM_144701	IL23R	0.0536626	0.880926	1
NM_207014	DNAI4	-0.00390484	0.909363	1
NM_152665	DYNLT5	-0.12924	0.411039	1
NM_001018067	SERBP1	0.124333	0.679188	1
NM_017779	DEPDC1	0.0200192	0.909363	1
NM_024911	WLS	0.02372	0.732648	1
NM_018841	GNG12	-0.0176474	0.490351	1
NM_001193334	WLS	-0.00711506	0.995219	1
NM_017768	LRRC40	0.0511912	0.552764	1
NM_030816	ANKRD13C	0.129059	0.304446	1
NM_001126044	PTGER3	-0.255864	0.0638048	1
NM_001199327	FPGT-TNNI3K	0.16379	0.191864	1
NM_001105659	LRRIQ3	0.1276	0.304446	1
NM_015978	TNNI3K	-0.160479	0.333727	1
NM_001002912	ERICH3	-0.103658	0.732648	1
NM_001130058	SLC44A5	-0.206689	0.143501	1
NM_002440	MSH4	0.0493624	0.769033	1
NM_001320287	SLC44A5	-0.196419	0.157281	1
NM_001320283	SLC44A5	-0.0881088	0.475354	1
NM_030965	ST6GALNAC5	0.0137165	0.899869	1
NM_001270384	MIGA1	0.0295727	0.769033	1
NM_001304725	GIPC2	-0.137579	0.179772	1
NM_017655	GIPC2	-0.108525	0.236411	1
NM_144573	NEXN	0.134236	0.956996	1
NM_001308237	ZZZ3	-0.123875	0.475354	1
NM_015534	ZZZ3	-0.147417	0.2769	1
NM_174858	AK5	-0.0855201	0.560828	1
NM_012093	AK5	-0.0300464	0.89039	1
NM_022159	ADGRL4	-0.0411753	0.251081	1
NM_001350699	ADGRL2	-0.0462367	0.627275	1
NM_001350698	ADGRL2	0.0088141	0.627275	1
NM_012302	ADGRL2	-0.0559851	0.610352	1
NM_001297704	ADGRL2	-0.107696	0.333727	1
NM_001134664	SAMD13	-0.0646151	0.552764	1
NM_001134663	SAMD13	0.12236	0.417923	1
NM_001350215	TTLL7	-0.0440629	0.333727	1
NM_001242859	PRKACB	-0.0156293	0.928387	1
NM_001242862	PRKACB	-0.00676283	0.966546	1
NM_001242861	PRKACB	-0.148705	0.85264	1
NM_002731	PRKACB	-0.23411	0.153746	1
NM_182948	PRKACB	-0.165694	0.143501	1
NM_001010971	SAMD13	0.040474	0.85264	1
NM_153259	MCOLN2	-0.0238884	0.521083	1
NM_001330655	DDAH1	-0.089658	0.213311	1
NM_198077	C1orf52	-0.334295	0.0346865	1
NM_001288563	DNAI3	0.0912872	0.947452	1
NM_012152	LPAR3	0.0144316	0.966546	1
NM_012137	DDAH1	-0.0354221	0.384176	1
NM_006536	CLCA2	-0.037711	0.705739	1
NM_152890	COL24A1	-0.0527549	0.705739	1
NM_001290053	LINC02801	-0.0615067	0.610352	1
NM_001134492	HS2ST1	-0.0681436	0.364742	1
NM_015350	LRRC8B	0.0882711	0.453331	1
NM_001320709	PKN2	0.159751	0.544757	1
NM_002053	GBP1	-0.0241678	0.995219	1
NM_001134476	LRRC8B	-0.0485531	0.397472	1
NM_052941	GBP4	-0.112423	0.371151	1
NM_018103	LRRC8D	-0.411612	0.0357597	1
NM_001134479	LRRC8D	-0.186467	0.601966	1
NM_001017975	HFM1	-0.292678	0.0730906	1
NM_024813	RPAP2	0.0512375	0.467949	1
NM_001350198	EVI5	0.103561	0.505596	1
NM_001308248	EVI5	0.185679	0.2769	1
NM_007358	MTF2	0.0747654	0.833883	1
NM_001024948	FNBP1L	0.216169	0.947452	1
NM_001261408	BCAR3	-0.0646266	0.536808	1
NM_001261409	BCAR3	0.0956392	0.482821	1
NM_206886	CCDC18	0.380872	0.194691	1
NM_003567	BCAR3	0.128564	0.2769	1
NM_152369	SLC44A3	0.161048	0.168248	1
NM_002858	ABCD3	-0.214423	0.136963	1
NM_001114106	SLC44A3	0.0897704	0.627275	1
NM_000350	ABCA4	0.0039114	0.995219	1
NM_001199691	TLCD4-RWDD3	-0.122543	0.928387	1
NM_001300989	PTBP2	0.0363472	0.871479	1
NM_001160301	DPYD	0.343674	0.113059	1
NM_152238	SNX7	-0.0545445	0.271598	1
NM_014839	PLPPR4	-0.0182865	0.89039	1
NM_033055	MFSD14A	-0.41181	0.0182751	1
NM_017734	PALMD	-0.25882	0.0973626	1
NM_001199834	VCAM1	-0.204067	0.172027	1
NM_033313	CDC14A	-0.00946137	0.78742	1
NM_001319211	CDC14A	-0.122113	0.310163	1
NM_001288823	OLFM3	-0.127117	0.217797	1
NM_080629	COL11A1	-0.00454389	0.81522	1
NM_001346780	AMY1C	-0.0785438	0.86205	1
NM_017619	RNPC3	-0.0403246	0.627275	1
NM_004038	AMY1A	-0.000640288	0.687997	1
NM_001008219	AMY1C	0.00321333	0.696847	1
NM_001008218	AMY1B	0.00855124	0.63581	1
NM_001008221	AMY1A	-0.0751448	0.89039	1
NM_006113	VAV3	0.171116	0.345926	1
NM_001079874	VAV3	-0.128035	0.18777	1
NM_001142551	WDR47	0.130838	0.679188	1
NM_020775	ELAPOR1	-0.0435028	0.618788	1
NM_007269	STXBP3	0.24968	0.168248	1
NM_001265613	MYBPHL	0.0025068	0.705739	1
NM_001321039	GPSM2	-0.294461	0.0812795	1
NM_004978	KCNC4	-0.306922	0.150272	1
NM_001201545	RBM15	-0.0553235	0.521083	1
NM_146421	GSTM1	0.101176	0.352797	1
NM_001349887	DRAM2	0.108193	0.778211	1
NM_001081976	TMIGD3	-0.0797835	0.577121	1
NM_138728	ST7L	0.0913611	0.490351	1
NM_018704	CTTNBP2NL	0.193708	0.293219	1
NM_001308264	ST7L	0.0958092	0.679188	1
NM_004980	KCND3	-0.0859438	0.261202	1
NM_014813	LRIG2	0.226883	0.28771	1
NM_001142782	MAGI3	-0.269847	0.0201968	1
NM_205848	SYT6	0.0351257	0.769033	1
NM_015906	TRIM33	0.257791	0.778211	1
NM_198459	DENND2C	0.0273647	0.805926	1
NM_001270805	SYT6	-0.0632192	0.505596	1
NM_001010922	BCL2L15	-0.0440325	0.653024	1
NM_001232	CASQ2	-0.070209	0.521083	1
NM_003176	SYCP1	0.227307	0.0245661	1
NM_002506	NGF	-0.0342137	0.909363	1
NM_001308316	TSPAN2	-0.241855	0.0288012	1
NM_018420	SLC22A15	0.0384023	0.687997	1
NM_001328609	CD2	-0.0652894	0.593631	1
NM_001542	IGSF3	-0.359089	0.0143942	1
NM_000701	ATP1A1	0.0817597	0.833883	1
NM_001007237	IGSF3	-0.188111	0.261202	1
NM_001253849	VTCN1	-0.15639	0.157281	1
NM_001256111	CD101	-0.0956054	0.364742	1
NM_024626	VTCN1	-0.0287548	0.696847	1
NM_006699	MAN1A2	0.524253	0.00512334	0.0289153
NM_206996	SPAG17	-0.130939	0.130654	1
NM_016527	HAO2	0.0608201	0.2769	1
NM_015836	WARS2	0.0652385	0.644394	1
NM_001320149	FAM72B	-0.0328619	0.778211	1
NM_001271872	SRGAP2C	0.136211	0.431889	1
NM_001100910	FAM72B	-0.0148363	0.679188	1
NM_203458	NOTCH2NLA	0.112386	0.560828	1
NM_001198834	PDE4DIP	0.030723	0.58535	1
NM_001350522	PDE4DIP	0.025152	0.467949	1
NM_004892	SEC22B	0.0101201	0.358401	1
NM_001350521	PDE4DIP	-0.0185261	0.593631	1
NM_014455	RNF115	0.33766	0.256107	1
NM_153713	LIX1L	0.148598	0.39079	1
NM_001195261	PDE4DIP	0.0126424	0.909363	1
NM_001195260	PDE4DIP	-0.0482722	0.39079	1
NM_001278141	NBPF12	-0.0993801	0.78742	1
NM_001348451	CHD1L	0.464001	0.0368607	1
NM_001461	FMO5	0.0197788	0.644394	1
NM_001350181	GPR89B	-0.122879	0.246123	1
NM_004326	BCL9	0.109664	0.417923	1
NM_001101663	NBPF11	-0.0209875	0.696847	1
NM_183372	NBPF11	0.0364851	0.956708	1
NM_001013644	LINC02591	0.0654891	0.364742	1
NM_001135789	PPIAL4C	-0.0397169	1	1
NM_001348147	LOC644634	0.0773719	0.204536	1
NM_004436	ENSA	0.00609701	0.966546	1
NM_001279354	VPS45	0.0693432	0.871479	1
NM_007259	VPS45	0.261092	0.298798	1
NM_001199739	CTSS	0.124769	0.778211	1
NM_015203	RPRD2	-0.0475477	0.71467	1
NM_025150	TARS2	0.0997077	0.723641	1
NM_001301317	TUFT1	0.144619	0.377629	1
NM_207171	POGZ	0.0893973	0.321806	1
NM_030918	SNX27	0.02783	0.750772	1
NM_015100	POGZ	0.0784626	0.513309	1
NM_020832	ZNF687	-0.0790165	0.601966	1
NM_020127	TUFT1	0.154741	0.339792	1
NM_005060	RORC	0.108114	0.778211	1
NM_001304764	ZNF687	0.121288	0.670422	1
NM_001001523	RORC	0.0290595	0.58535	1
NM_001206612	CHTOP	0.0363198	0.536808	1
NM_024330	SLC27A3	-0.0852548	0.130654	1
NM_001159484	NUP210L	-0.162126	0.246123	1
NM_020699	GATAD2B	-0.052347	0.732648	1
NM_020524	PBXIP1	-0.176554	0.146857	1
NM_002249	KCNN3	-0.0353205	0.89039	1
NM_170782	KCNN3	-0.0526294	0.513309	1
NM_001206866	IL6R	0.381208	0.0570886	1
NM_004952	EFNA3	0.133931	0.705739	1
NM_001350779	MSTO1	0.1961	0.121611	1
NM_152280	SYT11	-0.0861951	0.696847	1
NM_170708	LMNA	-0.315888	0.071151	1
NM_001282625	LMNA	-0.211023	0.298798	1
NM_001282624	LMNA	0.260644	0.0692533	1
NM_018489	ASH1L	0.247259	0.490351	1
NM_144702	LRRC71	0.0401838	0.653024	1
NM_005973	PRCC	-0.138104	0.475354	1
NM_178229	IQGAP3	0.218104	0.0856409	1
NM_001347698	CD5L	0.185951	0.130654	1
NM_031282	FCRL4	0.00702295	0.168248	1
NM_003126	SPTA1	-0.271877	0.327732	1
NM_001206567	IFI16	-0.106562	0.467949	1
NM_001231	CASQ1	0.0391451	0.521083	1
NM_001135050	IGSF9	0.0116679	0.723641	1
NM_002241	KCNJ10	0.0125015	0.81522	1
NM_004371	COPA	0.067654	0.601966	1
NM_001284217	FCRL6	-0.155194	0.160876	1
NM_001004310	FCRL6	0.0378951	0.661701	1
NM_012394	PFDN2	0.0440647	0.78742	1
NM_016382	CD244	0.212854	0.0403359	1
NM_001164757	NOS1AP	0.0252607	0.39079	1
NM_007348	ATF6	0.204589	0.327732	1
NM_001354983	DDR2	0.0687428	0.627275	1
NM_001254748	RGS5	-0.116611	0.28771	1
NM_031423	NUF2	-0.0541469	0.521083	1
NM_006182	DDR2	0.221143	0.0154222	1
NM_001354982	DDR2	0.156823	0.246123	1
NM_001174069	LMX1A	-0.287874	0.0222898	1
NM_177398	LMX1A	-0.237933	0.0316282	1
NM_001256570	RXRG	0.133813	0.179772	1
NM_001320302	FAM78B	0.296155	0.411039	1
NM_012474	UCK2	-0.160193	0.310163	1
NM_001322924	RCSD1	0.183405	0.593631	1
NM_032858	MAEL	-0.231451	0.03799	1
NM_001286378	MAEL	0.0571042	0.310163	1
NM_002697	POU2F1	0.493714	0.422344	0.459118
NM_001198783	POU2F1	0.114572	0.81522	1
NM_052862	RCSD1	0.199169	0.467949	1
NM_001937	DPT	-0.0456854	0.871479	1
NM_001143674	MPC2	0.0334664	0.769033	1
NM_152902	TIPRL	0.0752567	0.769033	1
NM_001349778	DCAF6	-0.234355	0.560828	1
NM_001349777	DCAF6	-0.11217	0.843251	1
NM_001320972	BLZF1	0.146827	0.241233	1
NM_013330	NME7	0.0770758	0.661701	1
NM_001677	ATP1B1	-0.193397	0.266366	1
NM_001204517	KIFAP3	-0.162699	0.204536	1
NM_001136107	NTMT2	0.052397	0.732648	1
NM_022716	PRRX1	-0.210257	0.0509636	1
NM_001204514	KIFAP3	0.00528741	0.909363	1
NM_001460	FMO2	0.130903	0.918869	1
NM_001185127	VAMP4	-0.0852312	0.497943	1
NM_002022	FMO4	-0.00297427	0.679188	1
NM_001300851	RC3H1	0.0653833	0.705739	1
NM_018122	DARS2	0.143537	0.0998521	1
NM_178527	SLC9C2	0.122778	0.377629	1
NM_014857	RABGAP1L	-0.0980318	0.644394	1
NM_001330989	RABGAP1L	-0.0936143	0.256107	1
NM_014412	CACYBP	-0.210424	0.22235	1
NM_001243763	RABGAP1L	-0.297043	0.071151	1
NM_001035230	RABGAP1L	-0.0310052	0.513309	1
NM_001007214	CACYBP	-0.188883	0.22235	1
NM_001328635	TNR	-0.163955	0.136963	1
NM_001286164	ASTN1	-0.021853	0.937915	1
NM_021936	PAPPA2	-0.0201498	0.723641	1
NM_001356506	CRYZL2P-SEC16B	-0.0546632	0.750772	1
NM_152663	RALGPS2	0.0698029	0.644394	1
NM_001324310	FAM20B	-0.246082	0.130654	1
NM_001324311	FAM20B	-0.175609	0.499323	1
NM_001168238	ABL2	-0.0894976	0.0878905	1
NM_014864	FAM20B	-0.23016	0.196023	1
NM_004841	RASAL2	0.120743	0.644394	1
NM_022347	TOR1AIP2	0.0348566	0.723641	1
NM_173533	TDRD5	-0.162527	0.339792	1
NM_014810	CEP350	-0.387903	0.00403747	1
NM_001329716	FAM163A	-0.0524337	0.769033	1
NM_001329714	FAM163A	0.0357432	0.918869	1
NM_144696	AXDND1	-0.143517	0.266366	1
NM_033343	LHX4	-0.411763	0.0279078	1
NM_001349933	TOR1AIP2	0.0494677	0.505596	1
NM_001194999	MR1	0.05736	0.438971	1
NM_004736	XPR1	0.0929948	0.909363	1
NM_001205294	CACNA1E	-0.0507794	0.705739	1
NM_001357	DHX9	0.311534	0.438971	1
NM_170706	NMNAT2	0.194727	0.12457	1
NM_002293	LAMC1	0.344996	0.467949	1
NM_015039	NMNAT2	0.143844	0.358401	1
NM_052965	TSEN15	0.0741637	0.985659	1
NM_015149	RGL1	0.171968	0.384176	1
NM_001297671	RGL1	-0.195141	0.200247	1
NM_052966	NIBAN1	-0.0916239	0.81522	1
NM_025191	EDEM3	0.448208	0.00387802	1
NM_001105518	SWT1	0.245023	0.236411	1
NM_017673	SWT1	0.235817	0.213311	1
NM_001164246	ODR4	-0.0808753	0.71467	1
NM_031935	HMCN1	-0.206615	0.521083	1
NM_001311193	PLA2G4A	0.195698	0.339792	1
NM_001317188	BRINP3	-0.0905357	0.627275	1
NM_199051	BRINP3	-0.0809215	0.536808	1
NM_130782	RGS18	-0.0224133	0.918869	1
NM_001319291		-0.367498	0.0481109	1
NM_024529	CDC73	0.1707	0.618788	1
NM_016066	GLRX2	0.192222	0.544757	1
NM_197962	GLRX2	-0.288227	0.0998521	1
NM_001243399	GLRX2	0.0830156	0.909363	1
NM_006684	CFHR4	0.000450212	0.364742	1
NM_198503	KCNT2	0.0662098	0.723641	1
NM_001195215	DENND1B	-0.0203548	0.995219	1
NM_001193640	CRB1	0.179445	0.200247	1
NM_001257965	CRB1	-0.0534198	0.947452	1
NM_080921	PTPRC	0.0350271	0.58535	1
NM_205860	NR5A2	-0.0796614	0.364742	1
NM_001276464	NR5A2	0.114853	0.28227	1
NM_203459	CAMSAP2	0.0707287	0.843251	1
NM_001164586	IGFN1	-0.190797	0.0603704	1
NM_014875	KIF14	-0.129816	0.610352	1
NM_001305792	KIF14	-0.00459848	0.928387	1
NM_000069	CACNA1S	0.0461532	0.618788	1
NM_004433	ELF3	-0.0177972	0.81522	1
NM_001167738	NAV1	-0.0888649	0.601966	1
NM_021636	LGR6	-0.0460439	0.661701	1
NM_001256129	ARL8A	0.375875	0.2769	1
NM_018085	IPO9	-0.218289	0.164531	1
NM_020443	NAV1	-0.211585	0.183739	1
NM_001193571	CSRP1	-0.0709684	0.58535	1
NM_001193570	CSRP1	-0.0701002	0.467949	1
NM_001193572	CSRP1	0.00177566	0.759886	1
NM_001017404	LGR6	-0.16285	0.0673967	1
NM_001017403	LGR6	0.133534	0.20889	1
NM_177402	SYT2	0.228653	0.113059	1
NM_006618	KDM5B	-0.0201533	0.899869	1
NM_032104	PPP1R12B	0.0576904	0.28771	1
NM_001304331	PPFIA4	0.106757	0.552764	1
NM_001319239	ZC3H11A	-0.0175128	0.995219	1
NM_001684	ATP2B4	0.0370379	0.805926	1
NM_005686	SOX13	-0.0239797	0.750772	1
NM_014935	PLEKHA6	0.0337881	0.352129	1
NM_015090	NFASC	-0.0715222	0.310163	1
NM_001199052	LEMD1	-0.0514301	0.63581	1
NM_199462	DSTYK	0.10169	0.627275	1
NM_201630	LRRN2	-0.0547184	0.339792	1
NM_006338	LRRN2	-0.0331006	0.333727	1
NM_001276320	YOD1	-0.182828	0.345926	1
NM_005449	FCMR	0.119957	0.431889	1
NM_001193338	FCMR	0.140299	0.241233	1
NM_182664	RASSF5	-0.0794286	0.505596	1
NM_025179	PLXNA2	-0.126671	0.143501	1
NM_175710	CR1L	0.0380487	0.778211	1
NM_000651	CR1	0.000402339	0.601966	1
NM_153262	SYT14	-0.0228208	0.966546	1
NM_001206696	IRF6	-0.138748	0.89039	1
NM_172362	KCNH1	0.0194716	0.732648	1
NM_001199809	INTS7	0.15893	0.241233	1
NM_014873	LPGAT1	0.1648	0.818709	1
NM_006243	PPP2R5A	-0.157676	0.31595	1
NM_001320808	LPGAT1	0.195434	0.601966	1
NM_001349671	RPS6KC1	0.055729	0.31595	1
NM_002763	PROX1	0.20428	0.0770977	1
NM_016343	CENPF	0.203053	0.304446	1
NM_005401	PTPN14	-0.0339654	0.431889	1
NM_001270616	PROX1	0.28657	0.0495203	1
NM_016121	KCTD3	-0.0326042	0.976101	1
NM_001017424	KCNK2	-0.230623	0.0326213	1
NM_014217	KCNK2	0.0276282	0.909363	1
NM_001438	ESRRG	-0.273817	0.0087252	1
NM_001243514	ESRRG	-0.115452	0.352129	1
NM_018040	GPATCH2	-0.113849	0.217797	1
NM_138796	SPATA17	-0.0339775	0.467949	1
NM_016052	RRP15	0.164218	0.127584	1
NM_001286128	MARK1	-0.308343	0.28227	1
NM_012414	RAB3GAP2	-0.0142565	0.833883	1
NM_022746	MTARC1	0.0685721	0.71467	1
NM_007207	DUSP10	0.0694345	0.528916	1
NM_032890	DISP1	-0.0205093	0.670422	1
NM_001324064	MIA3	-0.036482	1	1
NM_001300867	MIA3	-0.0361492	0.86205	1
NM_001143962	CAPN8	0.1467	0.217797	1
NM_005426	TP53BP2	-0.0788617	0.31595	1
NM_001037175	SUSD4	0.0957841	0.947452	1
NM_001322304	CNIH3	-0.0833566	0.769033	1
NM_001322305	CNIH3	0.0945346	0.58535	1
NM_018212	ENAH	0.192984	0.364742	1
NM_001130440	SRP9	0.16939	0.293219	1
NM_022735	ACBD3	0.394714	0.377629	1
NM_003607	CDC42BPA	0.867374	0.140203	0.185735
NM_020247	COQ8A	0.227335	0.18777	1
NM_002221	ITPKB	-0.366038	0.0288012	1
NM_001003665	STUM	0.326727	0.118706	1
NM_001098623	OBSCN	0.00147926	0.899869	1
NM_001323935	SNAP47	0.131666	0.0878905	1
NM_001323933	SNAP47	-0.0245363	0.81522	1
NM_033131	WNT3A	-0.209819	0.0570886	1
NM_001323934	SNAP47	-0.0387527	0.431889	1
NM_001323932	SNAP47	-0.196304	0.384176	1
NM_178549	ZNF678	0.0239094	0.899869	1
NM_004481	GALNT2	-0.336019	0.352129	1
NM_014777	URB2	-0.0846846	0.928387	1
NM_001258311	PGBD5	0.291165	0.928387	1
NM_001291866	GALNT2	0.0311092	0.411039	1
NM_175876	EXOC8	0.114675	0.490351	1
NM_024525	TTC13	-0.381294	0.0856409	1
NM_001300889	TRIM67	-0.0849536	0.475354	1
NM_001145036	COG2	0.0403039	0.833883	1
NM_001164537	DISC1	0.0648895	0.937915	1
NM_014801	PCNX2	0.107739	0.871479	1
NM_173508	SLC35F3	-0.298292	0.0403359	1
NM_001300845	SLC35F3	0.014629	0.824539	1
NM_001206794	ARID4B	-0.38725	0.0834067	1
NM_001098722	GNG4	-0.421955	0.0215724	1
NM_001098721	GNG4	-0.198723	0.172027	1
NM_031371	ARID4B	-0.417195	0.0570886	1
NM_152490	B3GALNT2	0.0652734	0.610352	1
NM_014765	TOMM20	-0.0321083	0.909363	1
NM_003193	TBCE	0.211252	0.0878905	1
NM_201545	LGALS8	0.187884	0.28771	1
NM_201544	LGALS8	0.175816	0.271598	1
NM_201543	LGALS8	0.0306443	0.871479	1
NM_080738	EDARADD	-0.147078	0.384176	1
NM_002508	NID1	0.416875	0.217797	1
NM_145861	EDARADD	-0.0475007	0.966546	1
NM_018072	HEATR1	-0.00576546	0.985659	1
NM_003272	GPR137B	-0.0737551	0.536808	1
NM_001035	RYR2	-0.06342	0.271598	1
NM_001347716	CHRM3	0.168159	0.304446	1
NM_000740	CHRM3	-0.0379265	0.661701	1
NM_001305424	FMN2	0.34731	0.231657	1
NM_144625	WDR64	0.0919246	0.31595	1
NM_003679	KMO	0.174309	0.85264	1
NM_152666	PLD5	-0.0631906	0.723641	1
NM_001195811	PLD5	-0.0968781	0.310163	1
NM_001206729	AKT3	0.145719	0.490351	1
NM_014812	CEP170	-0.0769759	0.708428	1
NM_001350246	SDCCAG8	0.0619649	0.909363	1
NM_181690	AKT3	0.166971	0.544757	1
NM_032328	EFCAB2	-0.165464	0.28227	1
NM_001290327	EFCAB2	-0.050869	0.200247	1
NM_001130957	CATSPERE	0.00356323	0.909363	1
NM_001297746	DESI2	-0.345651	0.196023	1
NM_001126	ADSS2	-0.0435425	0.899869	1
NM_033213	ZNF670	0.026058	0.880926	1
NM_001297569	ZNF124	0.20879	0.256107	1
NM_001323342	AHCTF1	0.218408	0.732648	1
NM_015446	AHCTF1	0.275083	0.231657	1
NM_001139459	CNST	0.238918	0.0925306	1
NM_001127462	NLRP3	-0.0889491	0.497943	1
NM_001304535	OR2L13	0.223915	0.150272	1
NM_001281853	GCSAML	0.087614	0.544757	1
NM_001281837	GCSAML	0.524361	0.0261916	0.0570948
NM_145278	GCSAML	-0.224156	0.0357597	1
NM_001127461	NLRP3	-0.0701181	0.705739	1
NM_001005484	OR4F5	-0.0653454	0.871479	1
NM_001005277	OR4F16	0.0385948	0.778211	1
NM_001005277	OR4F16	0.015411	0.241233	1
NM_152486	SAMD11	0.111236	0.750772	1
NM_001160184	PLEKHN1	0.109941	0.505596	1
NM_001291367	PERM1	-0.017174	0.661701	1
NM_015658	NOC2L	-0.121281	0.296721	1
NM_198317	KLHL17	-0.449723	0.0900906	1
NM_001205252	RNF223	-0.0100409	0.89039	1
NM_198576	AGRN	-0.309462	0.211784	1
NM_021170	HES4	-0.558776	0.126992	0.172107
NM_005101	ISG15	-0.137047	0.460608	1
NM_001130045	TTLL10	0.0494284	0.528916	1
NM_153254	TTLL10	0.103513	0.843251	1
NM_016176	SDF4	-0.242432	0.140203	1
NM_004195	TNFRSF18	-0.0154521	0.696847	1
NM_080605	B3GALT6	-0.168697	0.261202	1
NM_003327	TNFRSF4	0.0496767	0.741693	1
NM_017871	INTS11	-0.297968	0.0521103	1
NM_030649	ACAP3	0.0830541	0.86205	1
NM_001346116	PUSL1	0.0695194	0.659681	1
NM_152228	TAS1R3	-0.0173237	0.85264	1
NM_032348	MXRA8	-0.0684846	0.293219	1
NM_001127230	AURKAIP1	-0.316438	0.424873	1
NM_058167	UBE2J2	-0.208482	0.476622	1
NM_001127229	AURKAIP1	-0.308628	0.446119	1
NM_004421	DVL1	-0.217081	0.288384	1
NM_001282582	MXRA8	0.0912347	0.661701	1
NM_001282583	MXRA8	-0.0174517	0.769033	1
NM_001282585	MXRA8	-0.115679	0.12457	1
NM_001130413	SCNN1D	-0.0377231	0.966546	1
NM_001029885	CPTP	-0.31147	0.0458728	1
NM_022834	VWA1	-0.127138	0.521083	1
NM_001320153	CCNL2	-0.0989183	0.521083	1
NM_001145210	ANKRD65	-0.155337	0.653024	1
NM_001318485	MRPL20	0.10793	0.505596	1
NM_031921	ATAD3B	-0.253133	0.200247	1
NM_001350497	CCNL2	0.0238707	0.521083	1
NM_001146685	TMEM88B	-0.007432	0.601966	1
NM_001317238	ATAD3B	0.128335	0.200247	1
NM_001039211	ATAD3C	0.0594401	0.843251	1
NM_014188	SSU72	0.0880725	0.467949	1
NM_018188	ATAD3A	-0.36577	0.136963	1
NM_001170536	ATAD3A	-0.36568	0.136963	1
NM_001242659	FNDC10	0.551539	0.0481109	0.0843477
NM_001170689	MIB2	0.883447	0.00437406	0.0277248
NM_006983	MMP23B	-0.404954	0.0165133	1
NM_080875	MIB2	0.589984	0.059849	0.0990273
NM_001114748	TMEM240	-0.267841	0.113059	1
NM_001198995	NADK	-0.115997	0.327732	1
NM_001290264	SLC35E2B	0.171018	0.735531	1
NM_033529	CDK11A	-0.0769107	0.679188	1
NM_182838	SLC35E2A	0.413338	0.0458728	1
NM_001282538	GNB1	0.0875558	0.418592	1
NM_001304360	CFAP74	0.330963	0.0692533	1
NM_138705	CALML6	0.20007	0.110314	1
NM_178545	TMEM52	0.0722565	0.732648	1
NM_000815	GABRD	-0.13044	0.544757	1
NM_001146310	FAAP20	-0.162171	0.404222	1
NM_001256947	FAAP20	-0.242445	0.460608	1
NM_001282670	FAAP20	-0.00489936	0.63581	1
NM_002617	PEX10	0.132066	0.521083	1
NM_024848	MORN1	0.225381	0.490351	1
NM_007033	RER1	0.201224	0.358401	1
NM_001303013	PLCH2	0.228638	0.071151	1
NM_018216	PANK4	0.0768274	0.805926	1
NM_001303012	PLCH2	0.0133855	0.544757	1
NM_001010926	HES5	-0.0221595	0.805926	1
NM_152371	PRXL2B	0.566114	0.0770977	0.119414
NM_033467	MMEL1	0.0199804	0.976101	1
NM_080431	ACTRT2	-0.132286	0.261202	1
NM_014448	ARHGEF16	0.16457	0.327732	1
NM_182752	TPRG1L	0.271806	0.505596	1
NM_001126241	TP73	0.246716	0.0925306	1
NM_017818	WRAP73	-0.0231402	0.627275	1
NM_001204192	TP73	0.0142491	0.937915	1
NM_001204188	TP73	0.0574018	0.995219	1
NM_001163724	SMIM1	0.0824687	0.995219	1
NM_020710	LRRC47	0.200474	0.670422	1
NM_014704	CEP104	-0.390703	0.127584	1
NM_001288583	SMIM1	0.0905352	0.956996	1
NM_207356	C1orf174	0.0896405	0.947452	1
NM_207396	RNF207	0.0457019	0.71467	1
NM_015557	CHD5	0.0491819	0.81522	1
NM_000983	RPL22	0.118989	0.411039	1
NM_207370	GPR153	-0.311648	0.0655808	1
NM_181866	ACOT7	-0.0190956	0.918869	1
NM_181865	ACOT7	0.0663979	0.482821	1
NM_001024598	HES3	0.248654	0.231657	1
NM_001042665	PLEKHG5	0.0540196	0.85264	1
NM_001042664	PLEKHG5	-0.121719	0.153746	1
NM_148967	TNFRSF25	-0.086211	0.560828	1
NM_001265593	PLEKHG5	0.131477	0.880926	1
NM_019089	HES2	0.162618	0.71467	1
NM_020631	PLEKHG5	0.029577	0.880926	1
NM_001265594	PLEKHG5	-0.111721	0.172027	1
NM_031475	ESPN	-0.118435	0.241233	1
NM_024654	NOL9	0.0511763	0.593631	1
NM_138697	TAS1R1	-0.117518	0.513309	1
NM_001278648	ZBTB48	-0.0593392	0.371151	1
NM_014851	KLHL21	-0.469395	0.174736	1
NM_153812	PHF13	-0.608445	0.0396037	0.0739526
NM_138350	THAP3	0.0881197	0.71467	1
NM_001195753	THAP3	0.0754263	0.552764	1
NM_018198	DNAJC11	-0.0185797	0.333727	1
NM_001349619	CAMTA1	-0.238741	0.0907558	1
NM_001349618	CAMTA1	-0.129956	0.21535	1
NM_001349616	CAMTA1	-0.226404	0.0968067	1
NM_001349615	CAMTA1	-0.244466	0.0907558	1
NM_001349613	CAMTA1	-0.00162039	0.371151	1
NM_001349622	CAMTA1	-0.239535	0.0779669	1
NM_001349626	CAMTA1	-0.197397	0.161075	1
NM_004781	VAMP3	-0.330003	0.0440809	1
NM_021995	UTS2	0.0138151	0.899869	1
NM_006786	UTS2	-0.078193	0.759886	1
NM_007262	PARK7	-0.0402026	0.528916	1
NM_018948	ERRFI1	-0.410174	0.012964	1
NM_001042682	RERE	-0.469289	0.0134263	1
NM_001270501	CA6	-0.123236	0.153746	1
NM_001201483	ENO1	0.36326	0.976101	1
NM_001328619	SLC2A5	-0.137148	0.750772	1
NM_001328621	SLC2A5	-0.0396427	0.937915	1
NM_207420	SLC2A7	-0.0566552	0.705739	1
NM_025106	SPSB1	-0.261462	0.705739	1
NM_001130924	TMEM201	-0.0878413	0.31595	1
NM_032315	SLC25A33	-0.288832	0.446119	1
NM_005026	PIK3CD	0.0809547	0.796659	1
NM_001350235	PIK3CD	0.00398679	0.86205	1
NM_001350234	PIK3CD	0.229312	0.453331	1
NM_052960	RBP7	-0.0347005	0.732648	1
NM_001297778	NMNAT1	-0.0326483	0.687997	1
NM_022787	NMNAT1	-0.13481	0.183739	1
NM_001304452	PGD	0.345509	0.127584	1
NM_001304451	PGD	0.299927	0.159892	1
NM_001270517	CENPS-CORT	-0.0882248	0.78742	1
NM_001243768	CENPS-CORT	-0.0853278	0.696847	1
NM_004401	DFFA	0.0280314	0.81522	1
NM_001302	CORT	0.0996556	0.446119	1
NM_139208	MASP2	0.0257068	0.89039	1
NM_007375	TARDBP	0.152714	0.157281	1
NM_003132	SRM	0.112569	0.86205	1
NM_021146	ANGPTL7	-0.164271	0.271598	1
NM_001330350	UBIAD1	0.428041	0.0261916	1
NM_020780	DISP3	0.418834	0.0570886	1
NM_006341	MAD2L2	0.10975	0.39079	1
NM_001330355	FBXO44	-0.156013	0.404222	1
NM_012168	FBXO2	-0.147901	0.304446	1
NM_018438	FBXO6	-0.304382	0.0481109	1
NM_001127325	MAD2L2	-0.170462	0.453331	1
NM_001304791	FBXO44	-0.0352641	0.705739	1
NM_198545	DRAXIN	-0.142981	0.552764	1
NM_006172	NPPA	0.0363547	0.833883	1
NM_001330358	MTHFR	0.412962	0.00697268	1
NM_001286	CLCN6	0.356044	0.0692533	1
NM_002521	NPPB	-0.00586114	0.750772	1
NM_005957	MTHFR	0.348391	0.0692533	1
NM_001010881	C1orf167	-0.114962	0.593631	1
NM_001316320	PLOD1	0.12022	0.327732	1
NM_138346	KIAA2013	-0.0518004	0.772181	1
NM_021933	MIIP	0.0393017	0.71467	1
NM_001066	TNFRSF1B	-0.0421793	0.871479	1
NM_001324370	DHRS3	-0.0179541	0.490351	1
NM_004753	DHRS3	-0.00253432	0.358401	1
NM_001319225	DHRS3	-0.247477	0.102391	1
NM_001103170	AADACL3	0.0538298	0.732648	1
NM_001080830	PRAMEF12	0.148301	0.143501	1
NM_152290	CFAP107	-0.189254	0.0730906	1
NM_001146344	PRAMEF11	0.116888	0.191864	1
NM_023014	PRAMEF2	0.00514943	0.956996	1
NM_023013	PRAMEF1	-0.166458	0.824539	1
NM_001302551	HNRNPCL4	0.198712	0.0453918	1
NM_001146181	HNRNPCL3	0.198365	0.0495203	1
NM_001294139	PRAMEF1	0.0631705	0.377629	1
NM_001013631	HNRNPCL1	0.179006	0.071151	1
NM_001009611	PRAMEF4	-0.0513312	1	1
NM_001099850	PRAMEF18	-0.0396938	0.824539	1
NM_001300891	PRAMEF27	-0.0416903	0.404222	1
NM_001012277	PRAMEF7	-0.0648229	0.976101	1
NM_001010889	PRAMEF6	0.118053	0.298798	1
NM_001136561	HNRNPCL2	0.156771	0.175868	1
NM_001013407	PRAMEF5	0.0665746	0.71467	1
NM_001300891	PRAMEF27	-0.0216288	0.976101	1
NM_001013407	PRAMEF5	-0.0605905	0.475354	1
NM_001010889	PRAMEF6	-0.0534113	0.536808	1
NM_001024661	PRAMEF14	0.0715592	0.453331	1
NM_001099790	PRAMEF19	0.124135	0.404222	1
NM_001099851	PRAMEF17	-0.14222	0.153746	1
NM_001300891	PRAMEF27	-0.0434152	0.467949	1
NM_001098376	PRAMEF15	0.0187074	0.86205	1
NM_001291381	PRAMEF33	0.224916	0.20889	1
NM_001039361	PRAMEF10	0.222399	0.22235	1
NM_001012277	PRAMEF7	0.0488133	0.497943	1
NM_001099852	PRAMEF20	0.0739275	0.482821	1
NM_001012277	PRAMEF7	-0.0185405	0.759886	1
NM_001024661	PRAMEF14	-0.065091	0.928387	1
NM_001099852	PRAMEF20	-0.0394632	0.670422	1
NM_001099851	PRAMEF17	-0.129769	0.251081	1
NM_001300891	PRAMEF27	-0.0442233	0.544757	1
NM_001098376	PRAMEF15	0.00143738	0.871479	1
NM_001010847	LRRC38	-0.0579357	0.0770977	1
NM_006474	PDPN	-0.185779	0.0901869	1
NM_001006625	PDPN	0.0340229	0.490351	1
NM_015866	PRDM2	-0.0398083	0.490351	1
NM_001135610	PRDM2	-0.21584	0.85264	1
NM_001007257	PRDM2	0.136514	0.325508	1
NM_001278501	TMEM51-AS2	-0.113865	0.536808	1
NM_001136218	TMEM51	-0.0222657	0.78742	1
NM_001136217	TMEM51	0.0742282	0.327732	1
NM_001319665	TMEM51	-0.019245	0.81522	1
NM_024329	EFHD2	-0.413006	0.0139029	1
NM_007272	CTRC	0.263894	0.0170834	1
NM_001229	CASP9	-0.299889	0.121093	1
NM_015849	CELA2B	0.0562794	0.568947	1
NM_033440	CELA2A	-0.246523	0.0087252	1
NM_032996	CASP9	-0.405015	0.0326213	1
NM_032341	DDI2	-0.051205	0.364742	1
NM_024758	AGMAT	0.147936	0.438971	1
NM_006511	RSC1A1	0.0154688	0.759886	1
NM_015164	PLEKHM2	-0.0168792	0.627275	1
NM_207348	SLC25A34	0.156909	0.140203	1
NM_001350151	FBLIM1	-0.0443592	0.475354	1
NM_017556	FBLIM1	0.0644298	0.705739	1
NM_001024215	FBLIM1	-0.00242832	0.528916	1
NM_001013641	TMEM82	-0.216223	0.0973626	1
NM_001089591	UQCRHL	0.114746	0.339792	1
NM_001349685	HSPB7	-0.338495	0.00387802	1
NM_001349682	HSPB7	-0.109029	0.246123	1
NM_001257139	CLCNKA	-0.0985737	0.31595	1
NM_001242884	ZBTB17	0.157138	0.627275	1
NM_001165945	CLCNKB	-0.0224166	0.769033	1
NM_178840	SRARP	0.208658	0.0770977	1
NM_000085	CLCNKB	-0.0749973	0.28771	1
NM_004431	EPHA2	-0.127606	0.28771	1
NM_182623	FAM131C	0.392469	0.0901869	1
NM_030907	CPLANE2	-0.0850643	0.513309	1
NM_153213	ARHGEF19	0.0942611	0.653024	1
NM_001353349	SPATA21	0.145511	0.157281	1
NM_001114600	SZRD1	-0.25453	0.0603704	1
NM_001310155		-0.209511	0.0279078	1
NM_001310138		0.0312293	0.778211	1
NM_001271733	MST1L	0.0234065	0.552764	1
NM_001310138		0.0472087	0.417923	1
NM_014675	CROCC	-0.0259851	0.404222	1
NM_001141973	ATP13A2	-0.533786	0.0230276	0.0532998
NM_003000	SDHB	0.169811	0.31595	1
NM_012387	PADI4	-0.0975656	0.956996	1
NM_016233	PADI3	0.0206559	0.81522	1
NM_018715	RCC2	-0.0912465	0.460608	1
NM_001136204	RCC2	-0.0510535	0.372019	1
NM_207421	PADI6	0.21203	0.0453918	1
NM_152375	KLHDC7A	-0.105166	0.339792	1
NM_003748	ALDH4A1	0.0207372	0.833883	1
NM_152232	TAS1R2	0.17497	0.175868	1
NM_001161504	ALDH4A1	-0.132938	0.102391	1
NM_001348421	AKR7L	-0.218845	0.107622	1
NM_012067	AKR7A3	-0.137756	0.687997	1
NM_016183	MRTO4	0.127766	0.679188	1
NM_015047	EMC1	0.135993	0.58535	1
NM_001040125	SLC66A1	-0.295514	0.140203	1
NM_001320979	AKR7A2	-0.254195	0.172027	1
NM_001204088	MICOS10-NBL1	-0.198992	0.266366	1
NM_001204084	NBL1	0.0716262	0.417923	1
NM_001278165	NBL1	-0.106766	0.58535	1
NM_001278164	NBL1	-0.0491549	0.741693	1
NM_001204085	NBL1	0.0136443	0.521083	1
NM_001204086	NBL1	-0.254695	0.0495203	1
NM_005380	NBL1	0.0967925	0.627275	1
NM_001278166	NBL1	-0.0555989	0.937915	1
NM_000871	HTR6	-0.111092	0.204536	1
NM_019062	RNF186	-0.0453435	0.397472	1
NM_001349115	TMCO4	-0.0295006	0.696847	1
NM_001161729	PLA2G2A	-0.00764316	0.778211	1
NM_001161728	PLA2G2A	-0.0596607	0.490351	1
NM_015207	OTUD3	0.0167365	0.705739	1
NM_014589	PLA2G2E	0.00218547	0.85264	1
NM_012400	PLA2G2D	-0.0627534	0.58535	1
NM_000929	PLA2G5	-0.00329186	0.966546	1
NM_001316722	PLA2G2C	-0.198221	0.12457	1
NM_022819	PLA2G2F	-0.0505234	0.843251	1
NM_152376	UBXN10	0.311886	0.293219	1
NM_001039500	VWA5B1	0.127803	0.31595	1
NM_018584	CAMK2N1	0.00257066	0.741693	1
NM_024544	MUL1	-0.0658577	0.521083	1
NM_207334	FAM43B	0.117404	0.521083	1
NM_001785	CDA	0.161902	0.160876	1
NM_001103161	SH2D5	-0.376666	0.0415535	1
NM_020816	KIF17	-0.0465561	0.966546	1
NM_005216	DDOST	-0.0596247	0.618788	1
NM_001113349	ECE1	0.00658903	0.741693	1
NM_001113347	ECE1	0.171639	0.183739	1
NM_001397	ECE1	0.0442781	0.85264	1
NM_032264	NBPF3	-0.0591998	0.384176	1
NM_001350524	RAP1GAP	-0.106518	0.271598	1
NM_001145658	RAP1GAP	0.0903604	0.505596	1
NM_007352	CELA3B	-0.225074	0.102391	1
NM_005747	CELA3A	0.0468457	0.769033	1
NM_030761	WNT4	-0.28498	0.0509636	1
NM_020526	EPHA8	-0.182074	0.191864	1
NM_001347620	C1QC	-0.0158017	0.424873	1
NM_001347466	C1QA	-0.174186	0.107622	1
NM_001347465	C1QA	-0.0644538	0.627275	1
NM_000491	C1QB	0.0127808	0.899869	1
NM_001289974	LACTBL1	-0.0194287	0.759886	1
NM_001242521	TEX46	0.0434218	0.490351	1
NM_015013	KDM1A	0.1026	0.81522	1
NM_000864	HTR1D	0.195793	0.0570886	1
NM_001297620	HNRNPR	-0.324729	0.00357593	1
NM_030634	ZNF436	0.0472818	0.78742	1
NM_001077195	ZNF436	0.178834	0.241233	1
NM_017707	ASAP3	-0.0684711	0.384176	1
NM_001348075	MDS2	0.15827	0.377629	1
NM_002167	ID3	-0.206603	0.130654	1
NM_003198	ELOA	-0.0730832	0.601966	1
NM_001199802	RPL11	0.0675125	0.293219	1
NM_020362	PITHD1	0.190024	0.536808	1
NM_007260	LYPLA2	-0.188212	0.196023	1
NM_001841	CNR2	0.0996842	0.179772	1
NM_001166059	HMGCL	0.215698	0.0750726	1
NM_001127621	GALE	0.00130316	0.956996	1
NM_001008216	GALE	-0.0640846	0.805926	1
NM_000403	GALE	-0.0611478	0.78742	1
NM_000147	FUCA1	0.181493	0.200247	1
NM_001191009	SRSF10	-0.260697	0.153746	1
NM_017761	PNRC2	-0.0193101	0.909363	1
NM_152372	MYOM3	-0.104558	0.140203	1
NM_021258	IL22RA1	-0.00569159	0.78742	1
NM_198174	GRHL3	0.0434361	0.411039	1
NM_001195010	GRHL3	0.125782	0.164531	1
NM_001199013	STPG1	0.249984	0.0949223	1
NM_001199012	STPG1	-0.10278	0.58535	1
NM_021180	GRHL3	-0.0930425	0.339792	1
NM_013441	RCAN3	-0.674771	0.0062194	0.0324354
NM_001251980	RCAN3	0.00308778	0.976101	1
NM_001251979	RCAN3	-0.428639	0.103404	1
NM_001251978	RCAN3	-0.0757461	0.899869	1
NM_005839	SRRM1	-0.121261	0.28771	1
NM_001303449	SRRM1	-0.202856	0.22697	1
NM_004350	RUNX3	0.287739	0.778211	1
NM_001320672	RUNX3	0.043867	0.805926	1
NM_207170	SYF2	-0.08456	0.528916	1
NM_001282867	RHD	-0.113694	0.345926	1
NM_020317	RSRP1	0.340068	0.280271	1
NM_001321772	RSRP1	0.271126	0.0812795	1
NM_014313	TMEM50A	0.210764	0.200247	1
NM_015627	LDLRAP1	-0.0449351	0.769033	1
NM_178422	PAQR7	0.0676224	0.610352	1
NM_019557	MTFR1L	0.00947568	0.703945	1
NM_024037	AUNIP	-0.14174	0.417923	1
NM_020451	SELENON	-0.147115	0.431889	1
NM_001099627	MTFR1L	-0.0306213	0.679188	1
NM_001099626	MTFR1L	-0.00365299	0.937915	1
NM_203401	STMN1	-0.205462	0.071151	1
NM_203399	STMN1	0.10076	0.89039	1
NM_000437	PAFAH2	-0.324873	0.0208748	1
NM_152835	PDIK1L	-0.641231	0.164531	0.213166
NM_004455	EXTL1	-0.190146	0.0692533	1
NM_032513	SLC30A2	0.145026	0.438971	1
NM_001243532	PDIK1L	-0.562125	0.136963	0.183544
NM_032588	TRIM63	-0.0973542	0.327732	1
NM_015871	ZNF593	0.161073	0.20889	1
NM_024869	FAM110D	-0.141382	0.157281	1
NM_001297648	CNKSR1	-0.0980213	0.160876	1
NM_198137	CATSPER4	-0.20296	0.0620682	1
NM_001319944	CEP85	0.092082	0.28227	1
NM_001281518	CEP85	-0.0975158	0.424873	1
NM_001307925	ZNF683	0.158721	0.175868	1
NM_145345	UBXN11	-0.0883778	0.521083	1
NM_001803	CD52	-0.048823	0.593631	1
NM_183008	UBXN11	0.155592	0.179772	1
NM_001039775	CRYBG2	0.0222401	0.732648	1
NM_205861	DHDDS	-0.147614	0.417923	1
NM_005517	HMGN2	0.0743642	0.536808	1
NM_001006665	RPS6KA1	-0.176199	0.404222	1
NM_001202554	PIGV	0.291573	0.196023	1
NM_017837	PIGV	0.301617	0.157281	1
NM_006015	ARID1A	0.199408	0.450376	1
NM_021969	NR0B2	0.171714	0.0878905	1
NM_022078	GPATCH3	-0.0454922	0.909363	1
NM_032283	ZDHHC18	-0.18244	0.670422	1
NM_018066	GPN2	0.134099	0.644394	1
NM_006142	SFN	0.0992767	0.467949	1
NM_152365	KDF1	-0.0887672	0.333727	1
NM_052943	TENT5B	-0.0153493	0.778211	1
NM_001013642	TRNP1	0.0301654	0.759886	1
NM_003047	SLC9A1	-0.0125324	0.928387	1
NM_015023	WDTC1	0.0684605	0.653024	1
NM_004672	MAP3K6	0.21219	0.266366	1
NM_207397	CD164L2	0.0930979	0.411039	1
NM_032872	SYTL1	-0.0819364	0.271598	1
NM_005281	GPR3	0.0388536	0.947452	1
NM_003665	FCN3	0.0505507	0.899869	1
NM_005248	FGR	-0.011169	0.544757	1
NM_002038	IFI6	0.149441	0.310163	1
NM_001042747	FGR	0.00439222	0.696847	1
NM_001042729	FGR	-0.0254362	0.880926	1
NM_002713	PPP1R8	-0.106158	0.460608	1
NM_152660	FAM76A	0.173613	0.880926	1
NM_177424	STX12	-0.281681	0.0428016	1
NM_014110	PPP1R8	-0.156675	0.196023	1
NM_018053	XKR8	-0.349217	0.146043	1
NM_001286113	THEMIS2	-0.384712	0.0357597	1
NM_001286076	RPA2	-0.147451	0.593631	1
NM_014474	SMPDL3B	0.0385733	0.644394	1
NM_016311	ATP5IF1	0.0672709	0.86205	1
NM_014280	DNAJC8	0.236427	0.0770977	1
NM_001164723	PTAFR	-0.253779	0.0973626	1
NM_001164722	PTAFR	-0.0709435	0.446119	1
NM_031459	SESN2	0.213275	0.293219	1
NM_001127350	MED18	0.223642	0.213311	1
NM_023923	PHACTR4	-0.177784	0.568947	1
NM_017846	TRNAU1AP	0.111078	0.411039	1
NM_152304	RAB42	0.153488	0.377629	1
NM_001193532	RAB42	0.108841	0.58535	1
NM_001269	RCC1	-0.0944163	0.310163	1
NM_001319674	GMEB1	0.337718	0.0812795	1
NM_001172828	YTHDF2	-0.145606	0.39079	1
NM_016258	YTHDF2	-0.16943	0.200247	1
NM_001173128	YTHDF2	-0.169577	0.213311	1
NM_000911	OPRD1	-0.0593219	0.741693	1
NM_001171868	TMEM200B	0.556568	0.18777	0.236578
NM_001003682	TMEM200B	0.229809	0.732648	1
NM_001349717	MECR	-0.0498688	0.705739	1
NM_006762	LAPTM5	0.0040473	0.947452	1
NM_014654	SDC3	-0.251156	0.251081	1
NM_024522	NKAIN1	-0.0469338	0.521083	1
NM_016505	ZCCHC17	0.0522493	0.843251	1
NM_004814	SNRNP40	0.0199122	0.741693	1
NM_004102	FABP3	-0.0130048	0.966546	1
NM_018565	SERINC2	0.0287195	0.732648	1
NM_001199038	SERINC2	0.0540665	0.670422	1
NM_001199037	SERINC2	0.0831116	0.411039	1
NM_178865	SERINC2	0.0232325	0.805926	1
NM_001204414	TINAGL1	-0.0471139	0.759886	1
NM_001525	HCRTR1	-0.0879663	0.411039	1
NM_012392	PEF1	-0.212719	0.0692533	1
NM_001204415	TINAGL1	0.160714	0.236411	1
NM_001294335	ADGRB2	-0.394591	0.0750726	1
NM_001856	COL16A1	0.0140556	0.759886	1
NM_144569	SPOCD1	0.0941811	0.339792	1
NM_001319679	TMEM39B	0.0918729	0.871479	1
NM_001319677	TMEM39B	0.167942	0.136963	1
NM_005356	LCK	0.00488478	0.71467	1
NM_032648	FAM167B	0.157648	0.183739	1
NM_001301011	CCDC28B	0.0887994	0.404222	1
NM_175852	TXLNA	-0.0118758	0.741693	1
NM_019118	TMEM234	-0.226938	0.0587107	1
NM_018134	IQCC	-0.0416832	0.71467	1
NM_003757	EIF3I	-0.196201	0.0730906	1
NM_001099434	DCDC2B	-0.0439375	0.536808	1
NM_001042771	LCK	-0.244735	0.0143942	1
NM_001143888	BSDC1	0.106518	0.490351	1
NM_023009	MARCKSL1	0.28554	0.833883	1
NM_052841	TSSK3	0.0748211	0.687997	1
NM_001167676	FAM229A	0.0730599	0.618788	1
NM_001145720	ZBTB8B	0.154974	0.107622	1
NM_001308135	ZBTB8OS	-0.133128	0.204536	1
NM_005610	RBBP4	-0.3232	0.0139029	1
NM_001135256	RBBP4	-0.085314	0.293219	1
NM_020888	KIAA1522	0.325604	0.150272	1
NM_003680	YARS1	0.121613	0.601966	1
NM_001198972	KIAA1522	-0.0571551	0.723641	1
NM_153756	FNDC5	-0.126839	0.453331	1
NM_033504	TMEM54	-0.3138	0.00724113	1
NM_002143	HPCA	0.0358752	0.909363	1
NM_001171941	FNDC5	0.016119	0.947452	1
NM_001319143	AK2	-0.0627073	0.741693	1
NM_018207	TRIM62	-0.24632	0.333727	1
NM_001330483	TRIM62	0.0169126	0.871479	1
NM_001080438	A3GALT2	-0.0799929	0.384176	1
NM_004427	PHC2	0.0163604	0.460608	1
NM_152493	ZNF362	-0.0836158	0.638015	1
NM_145205	HMGB4	0.0234699	0.618788	1
NM_001352984	HMGB4	0.0391756	0.661701	1
NM_032884	C1orf94	-0.32489	0.0062194	1
NM_001134734	C1orf94	0.151827	0.475354	1
NM_005268	GJB5	-0.15809	0.110314	1
NM_024009	GJB3	-0.0173008	0.985659	1
NM_153212	GJB4	0.0399632	0.769033	1
NM_001005752	GJB3	-0.0105251	0.521083	1
NM_002060	GJA4	0.21629	0.0791665	1
NM_001320261	SMIM12	-0.0655423	0.750772	1
NM_001164825	SMIM12	-0.0163272	0.482821	1
NM_001164824	SMIM12	0.0155244	0.833883	1
NM_001195156	TMEM35B	-0.0710701	0.687997	1
NM_007167	ZMYM6	-0.0158437	0.985659	1
NM_001289089	ZMYM1	0.530233	0.000304618	0.0225012
NM_001289088	ZMYM1	-0.116801	0.191864	1
NM_014284	NCDN	0.337512	0.102391	1
NM_001199780	PSMB2	-0.21323	0.293219	1
NM_001199779	PSMB2	0.0722485	0.696847	1
NM_002794	PSMB2	0.102692	0.593631	1
NM_001190481	CLSPN	0.00649765	0.81522	1
NM_001348691	C1orf216	-0.0956499	0.377629	1
NM_152374	C1orf216	-0.118776	0.966546	1
NM_012199	AGO1	0.0610752	0.610352	1
NM_001317123	AGO1	0.276553	0.0555034	1
NM_017825	ADPRS	0.0360484	0.956996	1
NM_014466	TEKT2	-0.30402	0.0673967	1
NM_001286366	MAP7D1	-0.00239039	0.995187	1
NM_001270896	TRAPPC3	-0.229337	0.2769	1
NM_001270895	TRAPPC3	0.0151965	0.889663	1
NM_018166	EVA1B	0.571258	0.00724113	0.0336166
NM_024676	SH3D21	0.149633	0.899869	1
NM_001304762	EVA1B	0.474536	0.0230276	1
NM_001162530	SH3D21	0.0597265	0.796659	1
NM_032881	LSM10	0.110774	0.593631	1
NM_145047	OSCP1	0.11545	0.404222	1
NM_031280	MRPS15	-0.226714	0.0587107	1
NM_156039	CSF3R	0.210119	0.236411	1
NM_001323550	ZC3H12A	0.129729	0.661701	1
NM_001270876	MEAF6	-0.0615294	0.168248	1
NM_001323623	GNL2	0.016748	0.824539	1
NM_003462	DNALI1	-0.188867	0.115856	1
NM_001242908	RSPO1	0.0149403	0.705739	1
NM_173641	EPHA10	-0.123862	0.196023	1
NM_001350765	C1orf109	-0.210595	0.0555034	1
NM_017850	C1orf109	-0.0965917	0.384176	1
NM_001256875	CDCA8	-0.201116	0.0925306	1
NM_001113482	MANEAL	-0.200938	0.0297187	1
NM_152496	MANEAL	-0.0069157	0.577121	1
NM_198446	C1orf122	0.0657353	0.976101	1
NM_005955	MTF1	0.136084	0.505596	1
NM_001297434	INPP5B	0.0114394	0.843251	1
NM_001320830	SF3A3	-0.168433	0.241233	1
NM_002699	POU3F1	0.1917	0.482821	1
NM_004468	FHL3	-0.146744	0.196023	1
NM_016037	UTP11	-0.087249	0.536808	1
NM_017821	RHBDL2	0.0234496	0.89039	1
NM_012333	MYCBP	-0.268556	0.0603704	1
NM_001304746	RHBDL2	-0.0327692	0.568947	1
NM_030772	GJA9	0.0577132	0.364742	1
NM_024595	AKIRIN1	-0.425186	0.143501	1
NM_004552	NDUFS5	-0.029213	0.769033	1
NM_015038	KIAA0754	-0.0956844	0.490351	1
NM_003819	PABPC4	0.220462	0.411039	1
NM_014571	HEYL	0.258274	0.31595	1
NM_001195007	PPIE	0.0379318	0.928387	1
NM_001282397	HPCAL4	0.0315351	0.696847	1
NM_016257	HPCAL4	-0.0234472	0.89039	1
NM_022120	OXCT2	0.2667	0.371151	1
NM_032526	NT5C1A	0.127207	0.293219	1
NM_005376	MYCL	0.0544342	0.71467	1
NM_001312691	TRIT1	-0.101814	0.261202	1
NM_001136493	MFSD2A	-0.110257	0.497943	1
NM_001350482	CAP1	0.3288	0.127584	1
NM_001350479	CAP1	0.186471	0.536808	1
NM_001350481	CAP1	0.172982	0.397472	1
NM_001142604	PPT1	-0.0827132	0.679188	1
NM_005857	ZMPSTE24	0.0977603	0.345926	1
NM_001008740	TMCO2	-0.0838658	0.460608	1
NM_001852	COL9A2	-0.203736	0.191864	1
NM_001198980	SMAP2	-0.140961	0.266366	1
NM_001198978	SMAP2	0.0114421	0.81522	1
NM_022733	SMAP2	0.0747704	0.985659	1
NM_001198979	SMAP2	-0.0326008	0.661701	1
NM_001320179	ZFP69	0.459902	0.0062194	1
NM_022774	EXO5	-0.0105702	0.976101	1
NM_023070	ZFP69B	-0.0993486	0.505596	1
NM_152373	ZNF684	-0.0386304	0.750772	1
NM_014747	RIMS3	-0.0789078	0.976101	1
NM_001308115	NFYC	0.311447	0.0346865	1
NM_014223	NFYC	-0.0300663	0.63581	1
NM_001308114	NFYC	0.0775023	0.521083	1
NM_001142590	NFYC	-0.0307438	0.81522	1
NM_133467	CITED4	-0.35767	0.175868	1
NM_144990	SLFNL1	-0.0563964	0.796659	1
NM_001301237	CTPS1	0.0610115	0.453331	1
NM_001905	CTPS1	-0.059687	0.482821	1
NM_001291281	FOXO6	0.0103031	0.528916	1
NM_001302269	EDN2	-0.126135	0.0973626	1
NM_033553	GUCA2A	0.1607	0.110314	1
NM_007102	GUCA2B	-0.139439	0.153746	1
NM_001287508	PPCS	0.162003	0.22697	1
NM_001287507	PPCS	0.110111	0.521083	1
NM_001146192	ZMYND12	0.0676783	0.568947	1
NM_001080850	CCDC30	0.0393426	0.63581	1
NM_006347	PPIH	-0.101871	0.670422	1
NM_022356	P3H1	0.106051	0.976101	1
NM_024097	C1orf50	0.0896657	0.995219	1
NM_001185117	CLDN19	0.168998	0.168248	1
NM_004559	YBX1	0.101111	0.482821	1
NM_018538	ERMAP	0.187292	0.241233	1
NM_015911	ZNF691	-0.283214	0.0673967	1
NM_199342	SVBP	-0.0597816	0.8234	1
NM_001017922	ERMAP	0.145558	0.371151	1
NM_006516	SLC2A1	0.0284639	0.796659	1
NM_001159936	EBNA1BP2	0.0107669	0.937915	1
NM_001101376	FAM183A	0.350184	0.0154222	1
NM_006824	EBNA1BP2	0.0205233	0.723641	1
NM_144626	TMEM125	-0.0345008	0.505596	1
NM_182517	C1orf210	-0.111218	0.560828	1
NM_001164829	C1orf210	-0.113198	0.521083	1
NM_052877	MED8	0.241142	0.200247	1
NM_022821	ELOVL1	0.34741	0.13378	1
NM_005373	MPL	0.0343345	0.505596	1
NM_001255	CDC20	0.0127194	0.679188	1
NM_001256399	ELOVL1	0.24275	0.513309	1
NM_031207	HYI	-0.132493	0.732648	1
NM_014663	KDM4A	-0.219835	0.168248	1
NM_001136215	ARTN	0.0161146	0.20889	1
NM_201649	SLC6A9	-0.000559325	0.995219	1
NM_001319171	DPH2	-0.0859035	0.438971	1
NM_001349127	CCDC24	0.233593	0.130654	1
NM_030587	B4GALT2	-0.215251	0.0901869	1
NM_004047	ATP6V0B	-0.0713211	0.521083	1
NM_003780	B4GALT2	-0.144321	0.431889	1
NM_001328630	SLC6A9	0.040128	0.536808	1
NM_001328629	SLC6A9	0.136368	0.618788	1
NM_001349128	CCDC24	0.093309	0.653024	1
NM_001005417	B4GALT2	-0.194811	0.20889	1
NM_173484	KLF17	-0.0689823	0.78742	1
NM_001034024	DMAP1	0.0890211	0.618788	1
NM_001358438	KLF18	-0.0107295	0.81522	1
NM_001300747	TMEM53	-0.279167	0.0428016	1
NM_001145636	ARMH1	-0.217297	0.0770977	1
NM_001166292	PTCH2	0.0201478	0.89039	1
NM_004073	PLK3	0.391621	0.0485662	1
NM_001136537	BTBD19	0.109142	0.424873	1
NM_153274	BEST4	0.000188672	0.956996	1
NM_001013632	DYNLT4	0.102854	0.732648	1
NM_001012	RPS8	0.114096	0.833883	1
NM_024602	HECTD3	-0.151931	0.805926	1
NM_000374	UROD	-0.0923564	0.89039	1
NM_001128425	MUTYH	0.0523775	0.871479	1
NM_001293195	MUTYH	0.174749	0.293219	1
NM_001293196	MUTYH	0.160771	0.345926	1
NM_001048172	MUTYH	0.160771	0.345926	1
NM_032756	HPDL	-0.13087	0.0973626	1
NM_025077	TOE1	0.13926	0.544757	1
NM_001202431	PRDX1	-0.00436349	0.880926	1
NM_001330540	MMACHC	0.0849773	0.601966	1
NM_002574	PRDX1	0.0514921	0.928387	1
NM_001102601	CCDC163	0.0360558	0.899869	1
NM_001195193	NASP	0.0915153	0.750772	1
NM_153326	AKR1A1	0.187732	0.157281	1
NM_001114938	CCDC17	0.0995855	0.438971	1
NM_016486	TMEM69	0.292786	0.0925306	1
NM_001145349	IPP	0.170118	0.438971	1
NM_005727	TSPAN1	-0.0257301	0.843251	1
NM_001142548	RAD54L	-0.0147327	0.909363	1
NM_006369	LRRC41	0.00819991	0.899869	1
NM_001297565	UQCRH	-0.080412	0.723641	1
NM_001013615	LURAP1	-0.0844225	0.723641	1
NM_001256128	NSUN4	0.0148035	0.843251	1
NM_199044	NSUN4	-0.015623	0.610352	1
NM_001441	FAAH	-0.0971175	0.453331	1
NM_001357063	TMEM275	0.139159	0.217797	1
NM_147192	DMBX1	-0.0312585	0.985659	1
NM_001322255	KNCN	-0.0669404	0.475354	1
NM_001097611	KNCN	-0.0794668	0.513309	1
NM_014774	EFCAB14	0.0553927	0.78742	1
NM_001145474	TEX38	-0.152298	0.200247	1
NM_145279	MOB3C	-0.0611809	0.618788	1
NM_001243728	ATPAF1	0.023194	0.956996	1
NM_022745	ATPAF1	0.0711612	0.899869	1
NM_201403	MOB3C	-0.0930606	0.460608	1
NM_001319163	CYP4B1	0.0227151	0.880926	1
NM_000778	CYP4A11	-0.0717143	0.411039	1
NM_001320290	CYP4X1	0.0909986	0.304446	1
NM_178033	CYP4X1	0.215311	0.0336405	1
NM_001308102	CYP4A22	-0.0693742	0.732648	1
NM_001290406	TAL1	0.139292	0.528916	1
NM_001290405	TAL1	-0.0162385	0.976101	1
NM_005764	PDZK1IP1	-0.0206102	0.871479	1
NM_001287347	TAL1	0.00182107	0.513309	1
NM_001282937	STIL	-0.0968402	0.58535	1
NM_012186	FOXE3	-0.415675	0.03799	1
NM_004474	FOXD2	-0.0565568	0.741693	1
NM_001135181	SLC5A9	-0.127771	0.164531	1
NM_001349795	BEND5	-0.0884864	0.460608	1
NM_032110	DMRTA2	-0.00443663	0.723641	1
NM_078626	CDKN2C	0.142725	0.687997	1
NM_001262	CDKN2C	0.358006	0.175868	1
NM_001136508	C1orf185	0.0880046	0.266366	1
NM_001297666	TTC39A	0.0382455	0.966546	1
NM_014372	RNF11	-0.416118	0.00840859	1
NM_001159969	EPS15	0.0263073	0.63581	1
NM_001350210	OSBPL9	-0.266414	0.0998521	1
NM_138417	KTI12	-0.180455	0.670422	1
NM_015913	TXNDC12	-0.13211	0.63581	1
NM_001243767	BTF3L4	-0.143823	0.544757	1
NM_004153	ORC1	-0.14426	0.39079	1
NM_032864	PRPF38A	-0.117967	0.411039	1
NM_015696	GPX7	0.174372	0.339792	1
NM_023077	COA7	-0.101139	0.246123	1
NM_001042693	SHISAL2A	0.185298	0.601966	1
NM_001198961	ECHDC2	-0.162472	0.28227	1
NM_001319958	ECHDC2	-0.193388	0.153746	1
NM_006671	SLC1A7	-0.00449425	0.937915	1
NM_001199081	PODN	0.117853	0.723641	1
NM_001007250	SCP2	0.229003	0.298798	1
NM_017887	CZIB	-0.115615	0.298798	1
NM_001330589	CPT2	0.0126535	0.696847	1
NM_002370	MAGOH	-0.051731	0.560828	1
NM_033067	DMRTB1	-0.328513	0.0326213	1
NM_001039716	DIO1	-0.0431004	0.995219	1
NM_018982	YIPF1	-0.0687781	0.521083	1
NM_004872	TMEM59	0.0592406	0.497943	1
NM_052940	LRRC42	0.234947	0.880118	1
NM_001305049	TMEM59	0.0689507	0.778211	1
NM_001276395	LDLRAD1	-0.0496417	0.397472	1
NM_201546	CDCP2	0.0699303	0.505596	1
NM_016491	MRPL37	-0.434291	0.000808221	1
NM_001291332	MROH7	0.0675085	0.627275	1
NM_176782	FAM151A	0.10252	0.130654	1
NM_017904	TTC22	0.09284	0.871479	1
NM_001291333	TTC4	-0.096211	0.446119	1
NM_152607	LEXM	-0.0146592	0.778211	1
NM_152268	PARS2	-0.0556689	0.759886	1
NM_014762	DHCR24	-0.250738	0.102391	1
NM_174936	PCSK9	-0.0678394	0.217797	1
NM_057176	BSND	0.202439	0.0440809	1
NM_182532	TMEM61	0.158706	0.18777	1
NM_000562	C8A	-0.0575046	0.497943	1
NM_002353	TACSTD2	0.264313	0.0673967	1
NM_001085487	MYSM1	0.192291	0.271598	1
NM_002228	JUN	-0.172658	0.899869	1
NM_000775	CYP2J2	0.0418155	0.696847	1
NM_152377	C1orf87	0.0853138	0.593631	1
NM_032027	TM2D1	0.1994	0.28227	1
NM_019079	L1TD1	0.0679199	0.521083	1
NM_014495	ANGPTL3	0.0543055	0.956996	1
NM_012183	FOXD3	0.77211	0.110314	0.15459
NM_013339	ALG6	0.0588392	0.85264	1
NM_032437	EFCAB7	-0.144221	0.251081	1
NM_152489	UBE2U	-0.145208	0.217797	1
NM_001198681	LEPROT	0.0480916	0.431889	1
NM_001198683	LEPROT	0.118574	0.618788	1
NM_001037339	PDE4B	-0.0278613	0.769033	1
NM_001297442	PDE4B	0.12984	0.241233	1
NM_005478	INSL5	-0.119427	0.304446	1
NM_001146111	MIER1	-0.0182404	0.843251	1
NM_001077704	MIER1	0.0879496	0.653024	1
NM_001276352	C1orf141	0.174188	0.371151	1
NM_001319233	IL12RB2	-0.377176	0.0222898	1
NM_001199742	GADD45A	-0.0497115	0.610352	1
NM_004675	DIRAS3	-0.0350495	0.63581	1
NM_000329	RPE65	-0.119264	0.231657	1
NM_001350615	SRSF11	-0.365567	0.118706	1
NM_004768	SRSF11	0.0546517	0.552764	1
NM_001190463	CTH	-0.0281066	0.899869	1
NM_001036646	HHLA3	0.136203	0.256107	1
NM_005455	ZRANB2	-0.0751626	0.627275	1
NM_001134759	CRYZ	0.263141	0.0603704	1
NM_138467	TYW3	0.227049	0.140203	1
NM_001162916	TYW3	0.232466	0.140203	1
NM_001256114	LHX8	0.0930014	0.352129	1
NM_001001933	LHX8	-0.106941	0.327732	1
NM_004582	RABGGTB	-0.0356583	0.81522	1
NM_001127328	ACADM	-0.245277	0.071151	1
NM_080868	ASB17	-0.0949298	0.687997	1
NM_201626	USP33	0.126066	0.670422	1
NM_003902	FUBP1	-0.114466	0.397472	1
NM_001317103	DNAJB4	-0.136066	0.431889	1
NM_001317102	DNAJB4	-0.123429	0.364742	1
NM_001317099	DNAJB4	0.17318	0.759886	1
NM_001039585	PTGFR	0.0800595	0.505596	1
NM_006820	IFI44L	-0.0740236	0.696847	1
NM_006417	IFI44	0.106117	0.544757	1
NM_058248	DNASE2B	0.0774504	0.304446	1
NM_021233	DNASE2B	-0.0220795	0.880926	1
NM_004388	CTBS	0.0493021	0.89039	1
NM_025065	RPF1	-0.0378871	0.741693	1
NM_005274	GNG5	0.308471	0.0925306	1
NM_001310156	SPATA1	0.292588	0.183739	1
NM_001166294	SSX2IP	0.314481	0.377629	1
NM_001166295	SSX2IP	0.273565	0.627275	1
NM_018298	MCOLN3	0.0298214	0.89039	1
NM_032184	SYDE2	-0.0438513	0.899869	1
NM_001320715	BCL10	0.254892	0.102391	1
NM_001554	CCN1	0.352418	0.0481109	1
NM_001170670	ZNHIT6	0.196912	0.146857	1
NM_020729	ODF2L	-0.0715664	0.293219	1
NM_001285	CLCA1	-0.0684311	0.293219	1
NM_001206652	SH3GLB1	-0.24478	0.505596	1
NM_004261	SELENOF	-0.135017	0.127584	1
NM_006769	LMO4	0.129015	0.843251	1
NM_001514	GTF2B	0.0639448	0.85264	1
NM_019610	RBMXL1	-0.108721	0.918869	1
NM_001319181	GBP3	-0.195072	0.160876	1
NM_001349450	KYAT3	-0.16865	0.956996	1
NM_207398	GBP7	0.0951534	0.236411	1
NM_004120	GBP2	-0.0138326	0.966546	1
NM_052942	GBP5	0.042805	0.871479	1
NM_001320257	GBP6	-0.101439	0.168248	1
NM_001320185	ZNF326	0.133974	0.759886	1
NM_020063	BARHL2	0.00484779	1	1
NM_201269	ZNF644	0.0323083	0.824539	1
NM_016620	ZNF644	0.117276	0.947452	1
NM_003503	CDC7	0.0691869	0.404222	1
NM_001134420	CDC7	0.110576	0.397472	1
NM_001242810	BRDT	0.121722	0.2769	1
NM_173567	EPHX4	-0.0922913	0.298798	1
NM_001726	BRDT	0.0491506	0.653024	1
NM_015237	BTBD8	0.194799	0.204536	1
NM_183242	BTBD8	-0.133235	0.298798	1
NM_001287737	SETSIP	-0.0172093	0.956996	1
NM_001319683	GLMN	0.158729	0.769033	1
NM_001012425	C1orf146	0.274388	0.0176706	1
NM_005263	GFI1	-0.0297696	0.89039	1
NM_001127216	GFI1	0.0424028	0.86205	1
NM_001127215	GFI1	-0.200809	0.172027	1
NM_000969	RPL5	0.0824889	0.552764	1
NM_016040	TMED5	0.379294	0.207441	1
NM_001938	DR1	0.277264	0.146857	1
NM_001308251	BCAR3	-0.030886	0.536808	1
NM_001261410	BCAR3	-0.0057515	0.679188	1
NM_014597	DNTTIP2	0.202213	0.204536	1
NM_001328664	ARHGAP29	0.0472281	0.750772	1
NM_001328666	ARHGAP29	0.358929	0.593631	1
NM_001178096	F3	0.146544	0.871479	1
NM_001350223	SLC44A3	0.168778	0.251081	1
NM_001839	CNN3	-0.19943	0.377629	1
NM_001286056	CNN3	-0.0522014	0.528916	1
NM_144988	ALG14	0.388621	0.00101918	1
NM_152487	TLCD4	-0.186482	0.266366	1
NM_001199679	TLCD4	-0.0088201	0.63581	1
NM_001278248	RWDD3	0.0526286	0.653024	1
NM_001037317	PLPPR5	-0.110329	0.256107	1
NM_001013660	FRRS1	-0.0527413	0.696847	1
NM_000646	AGL	-0.0551116	0.741693	1
NM_000644	AGL	0.00330994	0.679188	1
NM_000642	AGL	-0.0483908	0.453331	1
NM_012243	SLC35A3	-0.096183	0.266366	1
NM_001271685	SLC35A3	-0.127711	0.179772	1
NM_001256387	LRRC39	0.151129	0.696847	1
NM_019083	TRMT13	-0.0838376	0.411039	1
NM_194292	SASS6	-0.0784003	0.490351	1
NM_003729	RTCA	0.0958152	0.460608	1
NM_022049	GPR88	-0.0384268	0.86205	1
NM_001439	EXTL2	-0.0923768	0.796659	1
NM_001144884	SLC30A7	0.107854	0.475354	1
NM_133496	SLC30A7	0.107854	0.475354	1
NM_015958	DPH5	0.132698	0.28227	1
NM_001400	S1PR1	0.00105612	0.78742	1
NM_001288821	OLFM3	0.155699	0.796659	1
NM_001286997	RNPC3-DT	-0.0493762	0.732648	1
NM_020978	AMY2B	0.142729	0.843251	1
NM_000699	AMY2A	-0.0772235	0.528916	1
NM_001346780	AMY1C	0.0118239	0.759886	1
NM_001346780	AMY1C	-0.0903117	0.490351	1
NM_004038	AMY1A	-0.0101068	0.871479	1
NM_004038	AMY1A	-0.12631	0.204536	1
NM_001008219	AMY1C	-0.0191333	0.85264	1
NM_001008219	AMY1C	-0.121523	0.22697	1
NM_001008218	AMY1B	0.00216537	0.918869	1
NM_001008218	AMY1B	-0.117565	0.256107	1
NM_001008221	AMY1A	0.014032	0.759886	1
NM_001008221	AMY1A	-0.0856985	0.521083	1
NM_018137	PRMT6	-0.180132	0.266366	1
NM_213651	SLC25A24	-0.124767	0.937498	1
NM_001143989	NBPF4	-0.190061	0.0440809	1
NM_013386	SLC25A24	-0.101024	0.560828	1
NM_001143988	NBPF6	0.157804	0.796659	1
NM_001010883	FAM102B	0.240312	0.0925306	1
NM_001349757	PRPF38B	0.0531057	0.956996	1
NM_144584	HENMT1	-0.076781	0.475354	1
NM_001144937	FNDC7	-0.113971	0.610352	1
NM_001102592	HENMT1	-0.0829373	0.364742	1
NM_152763	AKNAD1	0.012947	0.824539	1
NM_001048210	CLCC1	-0.0688631	0.928387	1
NM_001278203	CLCC1	-0.217097	0.833883	1
NM_001122961	CFAP276	-0.0243345	0.81522	1
NM_020141	TMEM167B	0.0662674	0.601966	1
NM_005645	TAF13	-0.0072183	0.995219	1
NM_001322248	TMEM167B	0.0706794	0.544757	1
NM_001330669	SARS1	0.0308986	0.899869	1
NM_032636	PSRC1	0.206359	0.127584	1
NM_001284353	ELAPOR1	-0.132544	0.200247	1
NM_001408	CELSR2	-0.0198334	0.644394	1
NM_001350237	PSRC1	0.212891	0.113059	1
NM_001205228	SORT1	0.439215	0.544757	1
NM_001199773	PSMA5	0.0660035	0.778211	1
NM_002790	PSMA5	0.064872	0.843251	1
NM_002959	SORT1	0.302229	0.183739	1
NM_001199774	PSMA5	0.0819679	0.976101	1
NM_031936	GPR61	-0.0189056	0.928387	1
NM_001350177	ATXN7L2	0.0724099	0.505596	1
NM_182580	CYB561D1	0.297369	0.110314	1
NM_020703	AMIGO1	-0.0933076	0.661701	1
NM_001134402	CYB561D1	0.300371	0.12457	1
NM_001040709	SYPL2	-0.0894818	0.976101	1
NM_001308170	AMPD2	0.0676535	0.86205	1
NM_004037	AMPD2	0.18933	0.661701	1
NM_001142368	GSTM2	0.0169964	0.482821	1
NM_203404	AMPD2	0.0396792	0.321806	1
NM_001257360	AMPD2	0.141073	0.723641	1
NM_001257361	AMPD2	0.216544	0.0170834	1
NM_005272	GNAT2	-0.200307	0.0357597	1
NM_147148	GSTM4	-0.0206451	0.750772	1
NM_001319952	EPS8L3	-0.0333174	1	1
NM_000851	GSTM5	-0.198353	0.136963	1
NM_000849	GSTM3	-0.185973	0.417923	1
NM_172212	CSF1	-0.105273	0.536808	1
NM_001242674	AHCYL1	-0.118402	0.339792	1
NM_006492	ALX3	-0.0270109	0.670422	1
NM_001270768	STRIP1	0.0327885	0.833883	1
NM_033088	STRIP1	-0.147957	0.39079	1
NM_001242673	AHCYL1	0.0796108	0.796659	1
NM_001242676	AHCYL1	-0.0503141	0.339792	1
NM_203412	UBL4B	0.0706875	0.31595	1
NM_001010898	SLC6A17	-0.0562311	0.696847	1
NM_032414	PROK1	-0.103021	0.358401	1
NM_004696	SLC16A4	-0.0499128	0.947452	1
NM_006402	LAMTOR5	-0.0886887	0.679188	1
NM_004974	KCNA2	-0.0888214	0.39079	1
NM_005549	KCNA10	-0.142917	0.164531	1
NM_002232	KCNA3	0.606485	0.18777	0.236578
NM_001040033	CD53	0.0221618	0.593631	1
NM_018372	LRIF1	-0.0556668	0.610352	1
NM_001320638	CD53	0.0330915	0.899869	1
NM_024901	DENND2D	-0.147226	0.261202	1
NM_001271833	DENND2D	-0.0306455	0.759886	1
NM_004000	CHI3L2	0.00485617	0.928387	1
NM_006090	CEPT1	0.141552	0.505596	1
NM_001330743	CEPT1	0.288493	0.153746	1
NM_001007794	CEPT1	0.281405	0.0750726	1
NM_001025199	CHI3L2	0.0906335	0.568947	1
NM_201653	CHIA	-0.0123404	0.460608	1
NM_001300831	PIFO	0.0363243	0.759886	1
NM_174896	C1orf162	-0.142429	0.246123	1
NM_024102	WDR77	0.0237067	0.976101	1
NM_002557	OVGP1	0.220433	0.687997	1
NM_001302679	ADORA3	0.0733854	0.384176	1
NM_001688	ATP5PB	0.12164	0.536808	1
NM_019099	INKA2	-0.157273	0.241233	1
NM_198926	INKA2	-0.0662764	0.618788	1
NM_007204	DDX20	-0.0125163	0.918869	1
NM_004185	WNT2B	-0.0596908	0.618788	1
NM_024494	WNT2B	0.0967151	0.327732	1
NM_020963	MOV10	-0.0289842	0.750772	1
NM_001321324	MOV10	0.0172066	0.778211	1
NM_001130079	MOV10	0.0289533	0.63581	1
NM_006135	CAPZA1	0.0170179	0.769033	1
NM_005167	PPM1J	-0.0640684	0.81522	1
NM_182759	TAFA3	-0.00287058	0.438971	1
NM_003051	SLC16A1	-0.11253	0.505596	1
NM_001166496	SLC16A1	-0.125891	0.490351	1
NM_001193431	PTPN22	-0.0476402	0.475354	1
NM_018364	RSBN1	-0.0876939	0.618788	1
NM_181358	HIPK1	-0.0455171	0.976101	1
NM_001253853	AP4B1	0.0531046	0.880926	1
NM_001253852	AP4B1	0.00705765	0.843251	1
NM_001319947	DCLRE1B	-0.0882458	0.490351	1
NM_001319946	DCLRE1B	0.0305993	0.947452	1
NM_001286352	OLFML3	-0.108233	0.446119	1
NM_198269	HIPK1	0.161524	0.627275	1
NM_198268	HIPK1	0.0666646	0.805926	1
NM_005872	BCAS2	-0.0329845	1	1
NM_002524	NRAS	-0.0176375	0.741693	1
NM_001242893	CSDE1	0.00447739	0.86205	1
NM_001172626	AMPD1	0.00709879	0.985659	1
NM_001102396	SIKE1	0.026606	0.995219	1
NM_001277991	TSHB	-0.0274522	0.985659	1
NM_000549	TSHB	-0.155294	0.143501	1
NM_001172411	VANGL1	0.0523883	0.601966	1
NM_001172412	VANGL1	-0.0155701	0.899869	1
NM_005599	NHLH2	0.0233305	0.759886	1
NM_001111061	NHLH2	-0.00485492	0.741693	1
NM_152367	MAB21L3	-0.0885332	0.339792	1
NM_001160234	ATP1A1	-0.0118562	0.833883	1
NM_001160233	ATP1A1	0.124462	0.985659	1
NM_001144822	CD58	-0.0181685	0.81522	1
NM_020440	PTGFRN	-0.365676	0.00751869	1
NM_025188	TRIM45	0.0383624	0.796659	1
NM_003594	TTF2	-0.0740156	0.63581	1
NM_017709	TENT5C	0.235384	0.397472	1
NM_017686	GDAP2	-0.0659526	0.928387	1
NM_152380	TBX15	-0.07248	0.384176	1
NM_001330677	TBX15	-0.133116	0.160876	1
NM_001166120	HSD3B2	-0.112281	0.453331	1
NM_001328615	HSD3B1	-0.00953441	0.81522	1
NM_000198	HSD3B2	-0.0520433	0.81522	1
NM_001080470	ZNF697	-0.129028	0.417923	1
NM_006623	PHGDH	0.0843017	0.560828	1
NM_001166107	HMGCS2	-0.0388036	0.417923	1
NM_001047980	NBPF7P	0.0295835	0.796659	1
NM_001159352	REG4	-0.105904	0.293219	1
NM_021794	ADAM30	-0.159798	0.217797	1
NM_001244910	FCGR1B	-0.136514	0.266366	1
NM_001123068	PPIAL4G	0.0772715	0.39079	1
NM_001287385	FAM72C	0.0580004	0.696847	1
NM_001346067	FAM72C	0.00367072	0.759886	1
NM_001345942	FAM72D	0.023429	0.536808	1
NM_207418	FAM72D	0.0691987	0.644394	1
NM_001135789	PPIAL4C	0.087277	0.384176	1
NM_001350520	PDE4DIP	-0.0432782	0.705739	1
NM_001002811	PDE4DIP	0.0396125	0.796659	1
NM_001330685	POLR3GL	-0.00837528	0.899869	1
NM_213652	HJV	0.145447	0.143501	1
NM_006472	TXNIP	0.152554	0.28771	1
NM_001313972	TXNIP	0.367507	0.0326213	1
NM_001039888	ANKRD34A	0.0254586	0.947452	1
NM_001303456	POLR3C	0.404013	0.130654	1
NM_144698	ANKRD35	-0.137917	0.475354	1
NM_005105	RBM8A	0.117126	0.251081	1
NM_006468	POLR3C	0.347666	0.102391	1
NM_001303041	ITGA10	0.204859	0.217797	1
NM_003846	PEX11B	0.134722	0.13378	1
NM_001184795	PEX11B	0.000888044	0.909363	1
NM_006099	PIAS3	-0.129659	0.404222	1
NM_001012758	NUDT17	0.0884847	0.536808	1
NM_007053	CD160	-0.072406	0.497943	1
NM_001097613	GPR89A	0.11747	0.213311	1
NM_001101663	NBPF11	-0.0568265	0.644394	1
NM_183372	NBPF11	-0.304706	0.679188	1
NM_005399	PRKAB2	0.482982	0.0587107	1
NM_001256336	CHD1L	-0.00928493	0.805926	1
NM_001348452	CHD1L	0.0648799	0.568947	1
NM_001323625	ACP6	-0.194871	0.153746	1
NM_016361	ACP6	-0.221446	0.0856409	1
NM_005266	GJA5	0.233861	0.0998521	1
NM_181703	GJA5	-0.000805779	0.871479	1
NM_005267	GJA8	-0.185384	0.179772	1
NM_001135789	PPIAL4C	0.175052	0.251081	1
NM_001164262	PPIAL4F	-0.0374134	0.618788	1
NM_015383	NBPF14	-0.00171311	0.778211	1
NM_001277444	NBPF9	-0.0224703	0.618788	1
NM_173638	NBPF15	0.0238847	0.778211	1
NM_001170755	NBPF15	-0.0458013	0.431889	1
NM_001164262	PPIAL4F	0.0229733	0.58535	1
NM_001355409	H3-2	0.0526671	0.358401	1
NM_003516	H2AC18	0.230593	0.271598	1
NM_021059	H3C14	-0.090197	0.687997	1
NM_001161334	H2BC18	-0.208503	0.143501	1
NM_003548	H4C14	0.00593278	0.769033	1
NM_001123375	H3C13	-0.08147	0.805926	1
NM_000566	FCGR1A	-0.0634612	0.528916	1
NM_003517	H2AC20	-0.102199	0.86205	1
NM_003516	H2AC18	0.179178	0.325522	1
NM_001328674	SV2A	-0.116968	0.333727	1
NM_001278719	SV2A	0.032377	0.750772	1
NM_001034077	H4C15	-0.0221861	0.610352	1
NM_181873	MTMR11	0.0588251	0.371151	1
NM_175065	H2AC21	-0.20433	0.217797	1
NM_016074	BOLA1	-0.0181812	0.417923	1
NM_005850	SF3B4	-0.127568	0.358401	1
NM_003528	H2BC21	0.0447965	0.599749	1
NM_021059	H3C14	0.226633	0.391717	1
NM_001145862	MTMR11	0.00598151	0.918869	1
NM_001280559	ANP32E	-0.0444482	0.271598	1
NM_001136479	ANP32E	0.251009	0.03799	1
NM_001304724	PLEKHO1	-0.36547	0.0834374	1
NM_001304723	PLEKHO1	-0.434054	0.0703697	1
NM_016274	PLEKHO1	-0.516018	0.0415535	0.076089
NM_001350529	PRPF3	-0.0769481	0.261202	1
NM_012113	CA14	0.057228	0.364742	1
NM_024579	C1orf54	-0.0361553	0.750772	1
NM_144697	CIART	0.170905	0.172027	1
NM_031901	MRPS21	-0.067554	0.339792	1
NM_001243772	APH1A	-0.0615561	0.909363	1
NM_001301042	C1orf54	-0.0368607	0.741693	1
NM_001301040	C1orf54	-0.109092	0.618788	1
NM_001300841	CIART	0.165553	0.231657	1
NM_182763	MCL1	-0.338028	0.0949223	1
NM_207047	ENSA	0.034557	0.995219	1
NM_019032	ADAMTSL4	0.277719	0.513309	1
NM_004425	ECM1	0.114946	0.384176	1
NM_032132	HORMAD1	0.111965	0.39079	1
NM_018178	GOLPH3L	0.0833733	0.460608	1
NM_001197325	ARNT	0.0809815	0.85264	1
NM_000396	CTSK	0.0918055	0.644394	1
NM_003568	ANXA9	-0.0657121	0.404222	1
NM_001243491	SETDB1	0.0267568	0.995219	1
NM_022075	CERS2	-0.339106	0.147724	1
NM_001319998	MINDY1	-0.112544	0.22697	1
NM_018379	MINDY1	-0.0502111	0.705739	1
NM_001163259	MINDY1	0.00112431	0.778211	1
NM_001040217	MINDY1	-0.0147689	0.78742	1
NM_001323913	GABPB2	0.116434	0.358401	1
NM_017860	C1orf56	-0.15845	0.20889	1
NM_144618	GABPB2	0.118321	0.339792	1
NM_001178062	SEMA6C	0.0250046	0.85264	1
NM_006818	MLLT11	-0.025761	0.81522	1
NM_001159642	BNIPL	-0.0191164	0.966546	1
NM_020239	CDC42SE1	-0.0225937	0.750772	1
NM_013353	TMOD4	0.0638172	0.544757	1
NM_001330689	PIP5K1A	-0.148176	0.577121	1
NM_001204848	TNFAIP8L2-SCNM1	0.124194	0.327732	1
NM_001271088	VPS72	0.043918	0.947452	1
NM_212551	LYSMD1	0.0647503	0.568947	1
NM_001204856	SCNM1	0.121578	0.304446	1
NM_001330692	PSMD4	-0.0842186	0.345926	1
NM_002810	PSMD4	-0.131681	0.20889	1
NM_001136543	LYSMD1	0.0663882	0.653024	1
NM_001258289	SELENBP1	0.083587	0.705739	1
NM_001330721	PI4KB	0.00946284	0.843251	1
NM_002796	PSMB4	-0.183787	0.231657	1
NM_001025603	RFX5	0.0979719	0.358401	1
NM_020770	CGN	0.109271	0.86205	1
NM_001004432	LINGO4	-0.127323	0.339792	1
NM_001144956	RIIAD1	-0.0277326	0.81522	1
NM_001291106	CELF3	0.163202	0.0856409	1
NM_001134939	OAZ3	-0.0696178	0.251081	1
NM_016178	OAZ3	-0.10533	0.310163	1
NM_001172648	CELF3	0.0541564	0.513309	1
NM_001301371	OAZ3	-0.0846834	0.327732	1
NM_031420	MRPL9	0.0874416	0.505596	1
NM_001083965	TDRKH	-0.165977	0.261202	1
NM_053055	THEM4	0.273769	0.127584	1
NM_182578	THEM5	-0.0186864	0.843251	1
NM_001136003	C2CD4D	0.0908937	0.377629	1
NM_005620	S100A11	-0.0768009	0.741693	1
NM_002966	S100A10	0.04152	0.78742	1
NM_001310142	LOC100131107	-0.0496596	0.521083	1
NM_001122965	RPTN	-0.064	0.327732	1
NM_007113	TCHH	0.241917	0.0306609	1
NM_001008536	TCHHL1	-0.0130974	0.661701	1
NM_002016	FLG	0.00404498	0.918869	1
NM_001009931	HRNR	-0.165745	0.172027	1
NM_016190	CRNN	-0.0233668	0.956996	1
NM_001014342	FLG2	-0.185768	0.653024	1
NM_019060	CRCT1	0.0260316	0.937915	1
NM_032563	LCE3D	0.0458249	0.741693	1
NM_178435	LCE3E	-0.158016	0.130654	1
NM_178438	LCE5A	0.134755	0.071151	1
NM_001024679	C1orf68	-0.0377576	0.81522	1
NM_014357	LCE2B	-0.0782887	0.618788	1
NM_178356	LCE4A	0.250174	0.505596	1
NM_178429	LCE2C	-0.0469446	0.78742	1
NM_178428	LCE2A	0.180184	0.12457	1
NM_178430	LCE2D	-0.0496289	0.568947	1
NM_178431	LCE3A	-0.102175	0.352129	1
NM_178434	LCE3C	0.12496	0.574414	1
NM_178433	LCE3B	-0.238075	0.29826	1
NM_001276331	LCE1C	-0.14851	0.153746	1
NM_001025231	KPRP	0.232799	0.0812795	1
NM_001128600	LCE6A	-0.184246	0.0316282	1
NM_178349	LCE1B	-0.155305	0.0346865	1
NM_178348	LCE1A	0.0815188	0.321806	1
NM_178354	LCE1F	0.0645147	0.618788	1
NM_178353	LCE1E	-0.0345977	0.593631	1
NM_178352	LCE1D	-0.123619	0.22697	1
NM_173080	SPRR4	0.072301	0.28771	1
NM_030663	SMCP	-0.103426	0.577121	1
NM_001199828	SPRR1A	-0.106119	0.251081	1
NM_005547	IVL	0.0323924	0.497943	1
NM_005416	SPRR3	-0.168372	0.321806	1
NM_001017418	SPRR2B	-0.0178141	0.568947	1
NM_003125	SPRR1B	-0.0669471	0.404222	1
NM_005988	SPRR2A	-0.109292	0.2769	1
NM_006945	SPRR2D	-0.0872195	0.261202	1
NM_001024209	SPRR2E	-0.138501	0.160876	1
NM_001014450	SPRR2F	-0.00618766	0.661701	1
NM_001195571	PRR9	-0.156888	0.0901869	1
NM_001014291	SPRR2G	-0.0421213	0.81522	1
NM_001010857	LELP1	-0.0102882	0.497943	1
NM_005621	S100A12	0.0232505	0.985659	1
NM_020393	PGLYRP4	0.135396	0.183739	1
NM_052891	PGLYRP3	0.0300937	0.759886	1
NM_002965	S100A9	-0.0469527	0.577121	1
NM_000427	LORICRIN	0.0899415	0.497943	1
NM_001319201	S100A8	-0.192163	0.246123	1
NM_001319198	S100A8	-0.0409235	0.104981	1
NM_001319197	S100A8	-0.172127	0.482821	1
NM_002963	S100A7	0.0929903	0.536808	1
NM_176823	S100A7A	0.0511634	0.352129	1
NM_001045479	S100A7L2	-0.177358	0.0750726	1
NM_019554	S100A4	0.247177	0.0195377	1
NM_005978	S100A2	-0.0140199	0.985659	1
NM_006271	S100A1	0.0019383	0.81522	1
NM_080388	S100A16	-0.0889877	0.12457	1
NM_020672	S100A14	0.145197	0.0620682	1
NM_014624	S100A6	0.0737533	0.741693	1
NM_005979	S100A13	-0.0746255	0.687997	1
NM_002962	S100A5	-0.0329687	0.377629	1
NM_002960	S100A3	-0.0437881	0.723641	1
NM_001317008	S100A16	-0.00891826	0.670422	1
NM_001024213	S100A13	-0.147274	0.179772	1
NM_001024212	S100A13	-0.0792414	0.497943	1
NM_001024211	S100A13	-0.194741	0.143501	1
NM_001024210	S100A13	0.0266453	0.544757	1
NM_004515	ILF2	0.257805	0.150272	1
NM_001324475	INTS3	0.113468	0.446119	1
NM_012437	SNAPIN	0.0107074	0.880926	1
NM_000906	NPR1	-0.105128	0.115856	1
NM_001255979	CREB3L4	0.153582	0.13378	1
[truncated: 24,598 more rows]

## Sheet: GO of All Diff in T13
ONTOLOGY	ID	Description	GeneRatio	BgRatio	pvalue	p.adjust	qvalue	geneID	Count	definition
BP	GO:0010506	regulation of autophagy	13/193	317/18723	2.63457e-05	0.0737153	0.0683047	ATP13A2/EIF4G1/PRKAA1/DHRSX/WAC/SIRT1/TPCN1/TLK2/FOXK2/CDK5R1/TP53INP2/SOGA1/KLHL22	13	Any process that modulates the frequency, rate or extent of autophagy. Autophagy is the process in which cells digest parts of their own cytoplasm.
CC	GO:0030496	midbody	9/207	196/19550	0.000249535	0.0419124	0.0390686	PKP4/BIRC6/YPEL5/GNAI2/KLHL9/PTCH1/ANXA2/CYLD/BCL3	9	A thin cytoplasmic bridge formed between daughter cells at the end of cytokinesis. The midbody forms where the contractile ring constricts, and may persist for some time before finally breaking to complete cytokinesis.
CC	GO:0005637	nuclear inner membrane	5/207	61/19550	0.000466155	0.0419124	0.0390686	LMNB1/CBX3/SIGMAR1/SIRT1/MAJIN	5	The inner, i.e. lumen-facing, lipid bilayer of the nuclear envelope.
CC	GO:0005912	adherens junction	8/207	170/19550	0.000467261	0.0419124	0.0390686	PKP4/DLG1/VEGFA/FERMT2/TJP1/ANXA2/KIFC3/CDH1	8	A cell-cell junction composed of the epithelial cadherin-catenin complex. The epithelial cadherins, or E-cadherins, of each interacting cell extend through the plasma membrane into the extracellular space and bind to each other. The E-cadherins bind to catenins on the cytoplasmic side of the membrane, where the E-cadherin-catenin complex binds to cytoskeletal components and regulatory and signali…
CC	GO:0009898	cytoplasmic side of plasma membrane	8/207	172/19550	0.000504968	0.0419124	0.0390686	PKP4/DLG1/GNAI2/RASA3/FERMT2/CDH1/CYLD/TIAM1	8	The leaflet the plasma membrane that faces the cytoplasm and any proteins embedded or anchored in it or attached to its surface.
CC	GO:0098562	cytoplasmic side of membrane	8/207	197/19550	0.00122118	0.0810863	0.0755846	PKP4/DLG1/GNAI2/RASA3/FERMT2/CDH1/CYLD/TIAM1	8	The side of a membrane that faces the cytoplasm.

## Sheet: KEGG of All Diff in T13
ID	Description	GeneRatio	BgRatio	pvalue	p.adjust	qvalue	geneID	Count
hsa05219	Bladder cancer	6/128	73/11118	0.000187557	0.0350731	0.0339576	O00716/P15692/A0A024RD33/B3GN61/P12830/A0A0U2ZQU7	6
hsa00062	Fatty acid elongation	4/128	37/11118	0.000824909	0.0692835	0.06708	A0A024QZV3/Q9NXB9/E9KL42/Q86TX2	4
hsa01040	Biosynthesis of unsaturated fatty acids	4/128	40/11118	0.0011115	0.0692835	0.06708	A0A024QZV3/Q9NXB9/E9KL42/Q86TX2	4
hsa00760	Nicotinate and nicotinamide metabolism	4/128	52/11118	0.00296097	0.138425	0.134023	Q9NXA8/A0A024R012/Q96EB6/A0A024QZQ1	4
hsa03022	Basal transcription factors	4/128	59/11118	0.00467983	0.175026	0.169459	A8K9W7/P78347/Q499G6/X5DR09	4

## Sheet: GO of Upgrade in T13
ONTOLOGY	ID	Description	GeneRatio	BgRatio	pvalue	p.adjust	qvalue	geneID	Count	definition
MF	GO:0042393	histone binding	6/70	244/18368	0.000333042	0.0616127	0.0564418	TSPY4/TSPY10/TSPY8/SIRT1/NAP1L4/ING1	6	Binding to a histone, any of a group of water-soluble proteins found in association with the DNA of eukaroytic chromosomes. They are involved in the condensation and coiling of chromosomes during cell division and have also been implicated in nonspecific suppression of gene activity.

## Sheet: GO of Downgrade in T13
ONTOLOGY	ID	Description	GeneRatio	BgRatio	pvalue	p.adjust	qvalue	geneID	Count	definition
BP	GO:0010506	regulation of autophagy	11/125	317/18723	9.20086e-06	0.0208124	0.0190603	ATP13A2/EIF4G1/DHRSX/WAC/TPCN1/TLK2/FOXK2/CDK5R1/TP53INP2/SOGA1/KLHL22	11	Any process that modulates the frequency, rate or extent of autophagy. Autophagy is the process in which cells digest parts of their own cytoplasm.
BP	GO:0034332	adherens junction organization	5/125	49/18723	1.84477e-05	0.0208644	0.0191079	VEGFA/FERMT2/TJP1/KIFC3/CDH1	5	A process that is carried out at the cellular level which results in the assembly, arrangement of constituent parts, or disassembly of an adherens junction. An adherens junction is a cell-cell junction composed of the epithelial cadherin-catenin complex at which the cytoplasmic face of the plasma membrane is attached to actin filaments.
BP	GO:0050767	regulation of neurogenesis	11/125	364/18723	3.30965e-05	0.023653	0.0216618	SPEN/SEMA3F/MAN2A1/VEGFA/HEY1/CAPRIN2/RGMA/METRN/CDK5R1/ANKRD27/ADNP	11	Any process that modulates the frequency, rate or extent of neurogenesis, the generation of cells in the nervous system.
BP	GO:0051960	regulation of nervous system development	12/125	443/18723	4.18266e-05	0.023653	0.0216618	SPEN/SEMA3F/DLG1/MAN2A1/VEGFA/HEY1/CAPRIN2/RGMA/METRN/CDK5R1/ANKRD27/ADNP	12	Any process that modulates the frequency, rate or extent of nervous system development, the origin and formation of nervous tissue.
BP	GO:0031330	negative regulation of cellular catabolic process	9/125	262/18723	6.67733e-05	0.0302082	0.0276652	ATP13A2/EIF4G1/PAIP1/WAC/PANO1/ANXA2/TLK2/FOXK2/KLHL22	9	Any process that stops, prevents, or reduces the frequency, rate or extent of the chemical reactions and pathways resulting in the breakdown of substances, carried out by individual cells.
BP	GO:0034331	cell junction maintenance	4/125	35/18723	8.44532e-05	0.0318388	0.0291586	DLG1/FERMT2/TJP1/KIFC3	4	The organization process that preserves a cell junction in a stable functional or structural state. A cell junction is a specialized region of connection between two cells or between a cell and the extracellular matrix.
BP	GO:0045217	cell-cell junction maintenance	3/125	15/18723	0.000124651	0.0379361	0.0347426	FERMT2/TJP1/KIFC3	3	The maintenance of junctions between cells.
BP	GO:1903363	negative regulation of cellular protein catabolic process	5/125	75/18723	0.000145394	0.0379361	0.0347426	ATP13A2/WAC/PANO1/ANXA2/TLK2	5
BP	GO:1901163	regulation of trophoblast cell migration	3/125	16/18723	0.00015267	0.0379361	0.0347426	ACVR1C/VEGFA/AGO2	3
BP	GO:0001701	in utero embryonic development	10/125	367/18723	0.000178264	0.0379361	0.0347426	ACVR1C/MAN2A1/VEGFA/SBDS/HEY1/PTCH1/ANKS6/LMX1B/E2F8/ARMC5	10	The process whose specific outcome is the progression of the embryo in the uterus over time, from formation of the zygote in the oviduct, to birth. An example of this process is found in Mus musculus.
BP	GO:0061450	trophoblast cell migration	3/125	17/18723	0.000184482	0.0379361	0.0347426	ACVR1C/VEGFA/AGO2	3	Trophoblast cell migration that is accomplished by extension and retraction of a pseudopodium. Trophoblast cells line the outside of the blastocyst.
BP	GO:0060976	coronary vasculature development	4/125	46/18723	0.000248706	0.0468811	0.0429346	SEC24B/VEGFA/SMAD6/ZBTB14	4	The process whose specific outcome is the progression of the blood vessels of the heart over time, from its formation to the mature structure.
BP	GO:0009895	negative regulation of catabolic process	9/125	320/18723	0.000299947	0.0521907	0.0477972	ATP13A2/EIF4G1/PAIP1/WAC/PANO1/ANXA2/TLK2/FOXK2/KLHL22	9	Any process that stops, prevents, or reduces the frequency, rate or extent of the chemical reactions and pathways resulting in the breakdown of substances.
BP	GO:0045216	cell-cell junction organization	7/125	200/18723	0.000393626	0.0635987	0.0582448	PKP4/DLG1/VEGFA/FERMT2/TJP1/KIFC3/CDH1	7	A process that is carried out at the cellular level which results in the assembly, arrangement of constituent parts, or disassembly of a cell-cell junction. A cell-cell junction is a specialized region of connection between two cells.
BP	GO:0007566	embryo implantation	4/125	53/18723	0.000430507	0.0649204	0.0594553	ACVR1C/VEGFA/AGO2/HMX3	4	Attachment of the blastocyst to the uterine lining.
BP	GO:0050770	regulation of axonogenesis	6/125	154/18723	0.000589295	0.0833116	0.0762982	SEMA3F/VEGFA/RGMA/METRN/CDK5R1/ADNP	6	Any process that modulates the frequency, rate or extent of axonogenesis, the generation of an axon, the long process of a neuron.
BP	GO:0043954	cellular component maintenance	4/125	61/18723	0.000736341	0.0979766	0.0897287	DLG1/FERMT2/TJP1/KIFC3	4	The organization process that preserves a cellular component in a stable functional or structural state.
BP	GO:0050769	positive regulation of neurogenesis	7/125	225/18723	0.000792324	0.0995687	0.0911868	SPEN/MAN2A1/VEGFA/CAPRIN2/METRN/ANKRD27/ADNP	7	Any process that activates or increases the frequency, rate or extent of neurogenesis, the generation of cells within the nervous system.
BP	GO:0061387	regulation of extent of cell growth	5/125	110/18723	0.000856397	0.0998503	0.0914446	SEMA3F/VEGFA/RGMA/CDK5R1/ADNP	5	Any process that modulates the extent of cell growth.
BP	GO:0010720	positive regulation of cell development	8/125	298/18723	0.00088285	0.0998503	0.0914446	SPEN/MAN2A1/VEGFA/CAPRIN2/FERMT2/METRN/ANKRD27/ADNP	8	Any process that increases the rate, frequency or extent of the progression of the cell over time, from its formation to the mature structure. Cell development does not include the steps involved in committing a cell to a specific fate.
CC	GO:0005912	adherens junction	8/134	170/19550	2.27967e-05	0.00640586	0.00607111	PKP4/DLG1/VEGFA/FERMT2/TJP1/ANXA2/KIFC3/CDH1	8	A cell-cell junction composed of the epithelial cadherin-catenin complex. The epithelial cadherins, or E-cadherins, of each interacting cell extend through the plasma membrane into the extracellular space and bind to each other. The E-cadherins bind to catenins on the cytoplasmic side of the membrane, where the E-cadherin-catenin complex binds to cytoskeletal components and regulatory and signali…
CC	GO:0030496	midbody	7/134	196/19550	0.000410715	0.0565597	0.0536041	PKP4/YPEL5/KLHL9/PTCH1/ANXA2/CYLD/BCL3	7	A thin cytoplasmic bridge formed between daughter cells at the end of cytokinesis. The midbody forms where the contractile ring constricts, and may persist for some time before finally breaking to complete cytokinesis.
CC	GO:0005911	cell-cell junction	11/134	494/19550	0.000603841	0.0565597	0.0536041	PKP4/DLG1/VEGFA/SH3KBP1/KCNJ11/FERMT2/CDC42BPB/TJP1/ANXA2/KIFC3/CDH1	11	A cell junction that forms a connection between two or more cells in a multicellular organism; excludes direct cytoplasmic intercellular bridges, such as ring canals in insects.
CC	GO:0005637	nuclear inner membrane	4/134	61/19550	0.000813805	0.0571698	0.0541823	LMNB1/CBX3/SIGMAR1/MAJIN	4	The inner, i.e. lumen-facing, lipid bilayer of the nuclear envelope.
CC	GO:0009898	cytoplasmic side of plasma membrane	6/134	172/19550	0.00120566	0.0677578	0.064217	PKP4/DLG1/RASA3/FERMT2/CDH1/CYLD	6	The leaflet the plasma membrane that faces the cytoplasm and any proteins embedded or anchored in it or attached to its surface.
MF	GO:0015280	ligand-gated sodium channel activity	3/127	12/18368	6.78535e-05	0.0253094	0.0229988	ASIC5/ASIC1/TPCN1	3	Enables the transmembrane transfer of a sodium ion by a channel that opens when a specific ligand has been bound by the channel complex or one of its constituent parts.
MF	GO:0015276	ligand-gated ion channel activity	6/127	143/18368	0.000478693	0.0595175	0.0540839	ASIC5/GRID1/KCNJ11/ASIC1/TPCN1/RASA3	6	Enables the transmembrane transfer of an ion by a channel that opens when a specific ligand has been bound by the channel complex or one of its constituent parts.
MF	GO:0022834	ligand-gated channel activity	6/127	143/18368	0.000478693	0.0595175	0.0540839	ASIC5/GRID1/KCNJ11/ASIC1/TPCN1/RASA3	6	Enables the transmembrane transfer of a solute by a channel that opens when a specific ligand has been bound by the channel complex or one of its constituent parts.

## Sheet: KEGG of Upgrade in T13
ID	Description	GeneRatio	BgRatio	pvalue	p.adjust	qvalue	geneID	Count
hsa04068	FoxO signaling pathway	6/46	200/11118	0.000161693	0.0195648	0.0175309	Q13131/O00141/Q96EB6/A0A024QZQ1/O95166/Q6IAW1	6
hsa03018	RNA degradation	4/46	104/11118	0.000871898	0.0527498	0.0472661	Q9Y4Y9/A0A090N8Y5/Q5VX58/Q9H361	4
hsa04727	GABAergic synapse	4/46	132/11118	0.00210609	0.0849458	0.076115	B3KP24/P04899/O95166/Q6IAW1	4
hsa03040	Spliceosome	4/46	184/11118	0.00689258	0.175847	0.157566	B2R6F3/P84103/Q9Y4Y9/A0A090N8Y5	4
hsa04722	Neurotrophin signaling pathway	4/46	190/11118	0.00770511	0.175847	0.157566	A0A024QZD2/B3KNV5/B4DLN5/Q9NRF2	4
hsa04213	Longevity regulating pathway - multiple species	3/46	104/11118	0.00901868	0.175847	0.157566	Q13131/Q96EB6/A0A024QZQ1	3
hsa00062	Fatty acid elongation	2/46	37/11118	0.010173	0.175847	0.157566	E9KL42/Q86TX2	2
hsa01040	Biosynthesis of unsaturated fatty acids	2/46	40/11118	0.0118211	0.178795	0.160207	E9KL42/Q86TX2	2

## Sheet: KEGG of Downgrade in T13
ID	Description	GeneRatio	BgRatio	pvalue	p.adjust	qvalue	geneID	Count
hsa05219	Bladder cancer	5/82	73/11118	0.000195694	0.0240704	0.0230713	P15692/A0A024RD33/B3GN61/P12830/A0A0U2ZQU7	5
hsa03022	Basal transcription factors	4/82	59/11118	0.000919169	0.0565289	0.0541826	A8K9W7/P78347/Q499G6/X5DR09	4
hsa04520	Adherens junction	5/82	119/11118	0.00182751	0.0749279	0.0718179	Q6MZU1/Q07157/B3GN61/P12830/A0A0U2ZQU7	5
